# Supplementary material for: Click-to-lead design of a picomolar ABA receptor antagonist with potent activity in vivo
Source: PubMed Central journal article supplement — Proc Natl Acad Sci U S A. 2021 Sep 16;118(38):e2108281118. doi: 10.1073/pnas.2108281118 (PMC8463862; doi:10.1073/pnas.2108281118), 2021-09-16
Supplement: pnas.2108281118.sapp.pdf [file pnas.2108281118.sapp.pdf]

Supplementary Information for

**Click-to-lead design of a picomolar ABA receptor antagonist with potent activity *in vivo***

Aditya S. Vaidya<sup>1,2</sup>, Francis C. Peterson<sup>3</sup>, James Eckhardt<sup>1,2</sup>, Zenan Xing<sup>1,2</sup>, Sang-Youl Park<sup>1,2</sup>, Wim Dejonghe<sup>1,2</sup>, Jun Takeuchi<sup>4,5</sup>, Oded Pri-Tal<sup>6</sup>, Julianna Faria<sup>1,2</sup>, Dezi Elzinga<sup>1,2</sup>, Brian F. Volkman<sup>3</sup>, Yasushi Todoroki<sup>4,5</sup>, Assaf Mosquna<sup>6</sup>, Masanori Okamoto<sup>7</sup>, Sean R. Cutler<sup>1,2</sup>.

**Affiliations**

1. Institute for Integrative Genome Biology, University of California, Riverside, CA, USA, 92521
2. Botany and Plant Sciences, University of California, Riverside, CA, USA, 92521
3. Biochemistry, Medical College of Wisconsin, Milwaukee, WI, USA, 53226
4. Faculty of Agriculture, Shizuoka University, Shizuoka 422-8529, Japan
5. Research Institute of Green Science and Technology, Shizuoka University, Shizuoka 422-8529.
6. The Robert H. Smith Institute of Plant Sciences and Genetics in Agriculture, Hebrew University of Jerusalem, Rehovot 7610001, Israel.
7. Center for Bioscience Research and Education, Utsunomiya University, 350 Mine, Utsunomiya, Tochigi 321-8505, Japan.

Corresponding author: Sean R. Cutler  
Email: cutler@ucr.edu

**This PDF file includes:**

Supplementary text  
Figures S1 to S13  
Tables S1  
Legends for Datasets S1-S2  
SI References

**Other supplementary materials for this manuscript include the following:**  
Datasets S1-S2

## Supplementary Materials and Methods

**Model click reactions using OPZ and 4-ethynyltoluene.** Prior to synthesizing a library of OP-4-triazoles we conducted model click reactions to establish the feasibility and efficiency of using unpurified reaction mixtures directly in ABA receptor activation assays. These reactions were performed using OPZ and 4-ethynyltoluene as follows: we mixed OPZ (4  $\mu$ L, 25 mM), alkyne (10  $\mu$ L, 10 mM), sodium ascorbate (2  $\mu$ L, 20 mM), BTAA (2  $\mu$ L, 20 mM) and copper(II) sulfate (2  $\mu$ L, 10 mM) in a 200  $\mu$ L PCR tube and incubated the reaction at 37°C for 48 hr. The reaction was monitored using TLC. In parallel, we ran a scaled-up synthesis of the triazole using similar ratios of the reagents and conditions, followed by precipitation of the product by the addition of 2N HCl and subsequent filtration to yield triazole **T1** (Supplementary Fig. 2A) from 4-ethynyltoluene as white powder in quantitative yields. The purified triazole and unpurified click reaction were both tested in receptor-mediated phosphatase inhibition assays. We also tested the effects of the individual click reagents on PP2C activity by running PP2C assays in the presence of sodium ascorbate (50  $\mu$ M), BTAA ligand (100  $\mu$ M), copper (II) sulfate (50  $\mu$ M), or a combination of all the click-reaction reagents. The Arabidopsis receptors and PP2C  $\Delta$ N-HAB1 used for this assay were expressed and purified using previously described expression clones and methods (1, 2). Phosphatase assays were conducted in an assay buffer (100 mM Tris-HCl -pH7.9, 100 mM NaCl, 30  $\mu$ g/ml BSA, 0.1% 2-mercaptoethanol) supplemented with 100 nM PYR1 (active receptor-titrated against HAB1), 25 nM  $\Delta$ N-HAB1, 50  $\mu$ M test compound (triazole product or OPZ precursor), in the presence or absence of 5  $\mu$ M ABA. Reactions were mixed, equilibrated for 20 minutes, substrate added (4-methylumbelliferyl phosphate, 1 mM final), and fluorescence data were collected ( $\lambda$  exc = 360 nm,  $\lambda$  emm = 460 nm) using a Tecan Infinite F200 Pro fluorimeter. PP2C activity was calculated relative to solvent-only control wells (i.e. receptors and PP2C in assay buffer, but no test compound); compounds were tested in duplicate.

**Synthesis and screening of a 4002 member OP-4-triazole library.** 4002 commercially available alkynes were purchased from Enamine, Asinex, Chembridge, and Urosy and solvated in DMSO as 10 mM stocks in 96-well Matrix plates (80 compounds per plate); these stock solutions were used directly in click reactions. Reactions were performed as follows (per well): OPZ (4  $\mu$ L, 25 mM, solution in DMSO) was mixed with library alkyne (10  $\mu$ L, 10 mM, solution in DMSO), freshly prepared-sodium ascorbate (2  $\mu$ L, 20 mM, solution in water), BTAA (2  $\mu$ L, 20 mM, solution in DMSO), and copper(II) sulfate (2  $\mu$ L, 10 mM, solution in water) in a 96-well polypropylene PCR plate, which was covered with sealing tape and incubated at 37°C for 48 hours. Plates were stored at -20 °C prior to their use in receptor activation assays. The crude reactions were diluted 100-fold for receptor-mediated phosphatase inhibition assays (~50  $\mu$ M OP-4-triazole, assuming quantitative conversion) in 96-well plates and conducted in presence of (PYR1 and HAB1 at 25 nM) in a volume of 100  $\mu$ L. Both ABA (5  $\mu$ M) and mock PP2C controls (no ABA) were included in each plate. Duplicate measurements of %-PP2C activity were averaged and wells that enabled recovery of PP2C activity to  $\geq$  90% relative to mock PP2C control were classified as hits. A total of 204 hits were obtained, which were combined into a small sub-library and retested for antagonist activity at a 10-fold lower concentration using receptors from the three receptor subfamilies: PYR1 (25 nM), PYL4 (100 nM), or PYL8 (50 nM), using assays conditions that were otherwise identical to those described above (**S. Data file 1**). To gauge the efficiency of library synthesis, LC-MS analyses of the 204 hit reactions were conducted to estimate OPZ consumption, which indicated an average reaction efficiency of 86% ( $\pm$  11%); however this subset is biased towards reactions that were successful.

**Arabidopsis receptor-mediated phosphatase inhibition assays.** Recombinant Arabidopsis PYR/PYL proteins and  $\Delta$ N-HAB1 used for phosphatase assays were expressed and purified using previously described expression clones and methods. (1–3). The PYR/PYL proteins were titrated against  $\Delta$ N-HAB1 to determine active concentration (see detailed description in section-determination of active receptor). Phosphatase assays were conducted in an assay buffer (100 mM Tris-HCl –pH7.9, 100 mM NaCl, 30  $\mu$ g/ml BSA, 0.1% 2-mercaptoethanol) supplemented with 25 nM PYR/PYL proteins (active receptors-titrated against HAB1), 25 nM  $\Delta$ N-HAB1, different concentrations of test chemicals ranging from 100  $\mu$ M to 4 nM, in the presence of 5  $\mu$ M ABA. Reactions were mixed, equilibrated for 20 minutes, substrate (4-methylumbelliferyl phosphate, 1 mM final) added, and fluorescence data were collected ( $\lambda$  exc = 360 nm,  $\lambda$  emm = 460 nm) using a Tecan Infinite F200 Pro fluorimeter. PP2C activity was calculated relative to solvent-only control wells (i.e. receptors and PP2C in assay buffer, but no test compound); compounds were tested in triplicate. Dose response data fitted to a single site log-logistic model using the drc (dose response curves) package to obtain EC<sub>50</sub> values in nM (effective concentrations at which 50% recovery in phosphatase activity is observed).

#### **Synthesis and characterization of a focused combinatorial propargyl amide library**

Solid phase coupling reagents were used to rapidly synthesize a 106 member library of diverse aryl/heteroaryl propargyl amides by coupling diverse carboxylic acids (obtained from Combiblocks) with propargyl amine in presence of polymer supported EDCI. Reactions were carried out in a 10 mL glass vial fitted with a small stir bar. Polymer supported EDCI (2 equiv, with labeling of 1.4 mmol/g, Sigma Aldrich) was weighed into siliconized vials (coated with Sigmacote) and 2 mL of anhydrous chloroform was added to swell the resin as it was being stirred. Carboxylic acid (1 equiv) was added to the polymer suspension and the resultant mixture stirred at RT for 30 mins, after which propargyl amine (1 equiv) was added and the reaction stirred for 48 hrs at RT. The reaction mixture was subsequently filtered through a polypropylene syringe filter to separate the resin from the reaction, and the resin washed with 3 mL anhydrous chloroform. The filtrate was concentrated under vacuum to yield the crude propargyl amides, which were used directly (without further purification) as a 10 mM stock in DMSO to react with OPZ as described using click conditions described earlier. The *in situ* formed triazoles were then tested at ~50  $\mu$ M OP-4-triazole, assuming quantitative conversion in phosphatase assays as described earlier in presence of 5  $\mu$ M ABA and PYR1, PYL4 or PYL8 at 25 nM with  $\Delta$ N-HAB1 at 25 nM. Hits that gave 90% recovery in phosphatase activity were resynthesized and tested for antagonistic activity *in vitro* using Arabidopsis receptor mediated phosphatase inhibition assays as described in previous section and *in vivo* in Arabidopsis thaliana seedling establishment assays as described in the following sections (**S. Data file 2**). These efforts produced a quinoline derivative (**4d**) which was modified to incorporate fluorine to improve hydrophobicity, yielding ligand **4o** or **Antabactin (ANT)**.

**Arabidopsis thaliana seedling establishment assays.** Greening experiments were performed in 96-well polystyrene petri plates using surface sterilized Arabidopsis (Col) seeds plated (20–25 seeds per well) on to 0.7% agar medium containing 1/2-X MS salts, 0.5% sucrose, 1  $\mu$ M ABA, and one of the 204 click reactions products (~10  $\mu$ M). Each experiment also included ABA (1  $\mu$ M ABA, no antagonist) and mock (no ABA) controls. After 4 days of stratification (4 °C), the plates were transferred to a growth chamber under 16 hour day/8 hour night illumination and photographed 4 days later. Green pixel counts were quantified using ImageJ (v1.53c) through Hue, Saturation and Brightness thresholding parameters (H: 38,79; S: 134, 255; B: 42, 255) selected to include only green cotyledons. The resulting pixel count was used to calculate greening area per seed and

the greening area per seed in each well was normalized to mock greening per seed to obtain % greening. Purified triazoles were evaluated for their ability to block the effects of exogenous ABA in inhibiting seed germination/greening alongside PanMe, AA1, and OPZ at concentrations ranging from 200 nM to 50000 nM in triplicate in presence of 1  $\mu$ M ABA. Green pixel area (normalized to mock control) was fitted to log(inhibitor) vs. response-(variable slope) model using non-linear regression to infer the EC<sub>50</sub>s (concentration at which 50% of green area is observed relative to mock controls), using GraphPad Prism 6.0.

**X-ray crystallography & structure determination.** PYL10<sup>25-183</sup> was expressed in *E. coli* and purified as described previously (4). Purified protein was stored at -80 °C in a buffer containing 20 mM HEPES (pH 7.6), 50 mM sodium chloride, 10 mM DTT and 30% glycerol. Purified PYL10<sup>25-183</sup> was exchange into a buffer containing 20 mM HEPES (pH 7.6), 50 mM sodium chloride, 10 mM dithiothreitol, and 5 mM magnesium chloride, mixed with a 5-fold molar excess of **4a** and concentrated to 25 mg/mL. Crystallization of the PYL10<sup>25-183</sup>:**4a** complex was conducted by sitting drop vapor diffusion at 19 °C. Drops were formed by mixing equal volumes of the Purified PYL10<sup>25-183</sup>:**4a** complex with well solution containing 200 mM tribasic ammonium citrate (pH 7.0) and 20% (w/v) PEG 3,350. The resulting crystals were flash frozen after passing through a cryoprotection solution consisting of well solution plus 20% glycerol. The PYL10<sup>25-183</sup>:ANT complex was prepared by mixing a 5-fold molar excess of ANT with PYL10<sup>25-183</sup> in a buffer containing 20 mM HEPES (pH 7.6), 50 mM sodium chloride, 10 mM dithiothreitol, and 5 mM magnesium chloride and concentrating to 25 mg/mL. Crystallization was conducted by hanging drop vapor diffusion at 19 °C by mixing equal volumes of the PYL10<sup>25-183</sup>:ANT complex with well solution containing 200 mM tribasic ammonium citrate (pH 7.0) and 22% (w/v) PEG 3,350. Crystals were flash frozen after passing through a cryoprotection solution consisting of 200 mM tribasic ammonium citrate (pH 7.0), 25% (w/v) PEG 3,350 and 20% glycerol. X-ray diffraction data for each complex were gathered from a single crystal. Diffraction data was collected at 100 K using a Rigaku MicroMax-007 X-ray generator equipped with VariMax-HF optics and a R-Axis 4++ detector. Diffraction data were indexed, integrated, and scaled using HKL2000 software package (5). The PYL10<sup>25-183</sup>:**4a** and PYL10<sup>25-183</sup>:ANT complexes were solved by molecular replacement using a PYL10<sup>25-183</sup>:hexabactin complex (PDB ID 6NWB) devoid of ligand and water molecules as the search model to evaluate the initial phases. Phenix.AutoMR solved the initial phases and automatically built the majority of residues for both complexes (6). The resulting models were completed through iterative rounds of manual model building in Coot (7) and refinement with Phenix.refine (6) using translational libration screw-motion (TLS) and individual atomic displacement parameters. Phenix topology files for novel **4a** and ANT ligands were generated using the PRODRG server (<http://davapc1.bioch.dundee.ac.uk/cgi-bin/prodrg/>). Geometry of the final structures were validated using Molprobity (8). Data collection and refinement statistics for the final models are listed in Supplementary Table 1 and the coordinates for PYL10<sup>25-183</sup>:**4a** and PYL10<sup>25-183</sup>:ANT complexes deposited in the Protein Data Bank, PDB IDs 7MLC and 7MLD, respectively. PYL10<sup>25-183</sup>:**4a** collection date: 2019-5-23, PYL10<sup>25-183</sup>:ANT collection date: 2019-7-1. Ligand-protein contacts were determined and visualized using PLIP (9, 10) and Ligplot+ (11). The structure images shown in Figure 3 were rendered in Cinema 4D (Maxon) using OctaneRender (OTOY) after importing scenes generated using ANT/PYL10 coordinates and PLIP analyses from Pymol (Schroedinger).

**Fluorescence polarization assays.** FP assays were conducted in a buffer of 100 mM Tris-HCl, pH 7.9, 100 mM NaCl, 0.1%v/v 2-mercaptoethanol, 0.1mg/mL BSA, and 0.006%

v/v Tween 20 at 25 °C in black, non-binding 96 well microplates (100 µL; 1%v/v DMSO). Fluorescence polarization was quantified using a Tecan Infinite Pro 200 with  $\lambda_{exc} = 535$  nm,  $\lambda_{emm} = 590$  nm (G factor-1). Fraction bound was determined according to the equation  $\Theta = (FP_{max} - FP) / (FP_{max} - FP_{min})$ , where  $FP_{max}$  is the maximum FP signal (signal obtained at highest receptor concentration tested),  $FP_{min}$  is the minimum FP signal (signal from no receptor control) and FP is the signal obtained at a certain protein concentration.

To establish conditions for conducting equilibrium binding measurements, titration experiments were performed with 2.5, 5, and 10 nM TAMRA-ANT with receptor concentrations ranging from 0.4 to 100 nM; FP was measured at regular intervals over 120 minutes. Based on these experiments, dissociation constants were inferred in FP experiments using 5 nM TAMRA-ANT equilibrated with receptors for either 30 mins (PYR1) or 60 mins (PYL5 and PYL8) prior to measurements. To estimate dissociation constants, titration data were fit to the following quadratic equation in GraphPad Prism:

$$\text{Fraction bound} = \frac{([L]_{total} + [P]_{total} + K_d) - \sqrt{([L]_{total} + [P]_{total} + K_d)^2 - (4 \times [L]_{total} \times [P]_{total})}}{2 \times [L]_{total}}$$

Where,  $[L]_{total}$  = total concentration of probe and  $[P]_{total}$  is total concentration of protein.  $[P]_{total}$  was determined by titration experiments of each receptor preparation assay using TAMRA-ANT as described by Jarmoskite *et al.* (12).

**Determination of active receptor concentrations by titration.** The concentration of active Arabidopsis receptors used in each biochemical assay was determined by one of two titration methods. In the first method, the active receptor concentration was inferred from  $IC_{50}$  values for inhibition of  $\Delta N$ -HAB1. To ascertain this, HAB1 (25 nM) was titrated with different concentrations of total ABA receptor protein (6.25 nM - 400 nM) in presence of 10 µM ABA in PP2C assays, as described above. Reactions were mixed, substrate added, and phosphatase activity data were collected. PP2C activity was calculated relative to no receptor control wells. The dose response data fit using non-linear regression (4 parameter logistic model) to determine the receptor concentration that gives 50% inhibition ( $IC_{50}$ ). The fraction of active receptors was determined by dividing theoretical  $IC_{50}$  (12.5 nM) by the experimental  $IC_{50}$ . In the second method, receptors were titrated against TAMRA-ANT, to identify the concentration at which FP saturates (which occurs when active receptor concentration matches TAMRA-ANT concentration). ABA receptors (7.8 nM to 500 nM) were incubated for 90 minutes at 25 °C for 90 mins in the buffer described above and FP data collected and used to infer fraction, as described above by breakpoint analysis (12), see supplemental Figure 9C. Using this method, we determined the percent active receptors used in our FP experiments to be 85% for PYR1, 71% for PYL5, and 67% PYL8.

**FP-based TAMRA-ANT competition Assays** In case of competition experiments (n = 3), 10 nM of PYR/PYL protein were chosen as it produced a dynamic range of  $\geq 100$  mP with Z factor 0.6-0.7. Different concentrations of antagonists/competitors (0.97 nM - 10000 nM for ANT) and (9.7 nM to 100000 nM for AA1) were incubated with probe (5 nM) and PYR/PYL protein (10 nM) at 25 °C for 120 mins (total reaction volume-100 µL with 2%v/v DMSO).

**Isothermal titration calorimetry (ITC).** The ITC experiments were performed with an iTC<sub>200</sub> calorimeter (Microcal, GE Healthcare Bio-Sciences AB) as described previously (13). Briefly, His<sub>6</sub>-tagged PYL5 was assayed at a concentration of 50 µM with AA1 and ABA stock solutions in the injection syringe at a concentration of 500 µM. All titrations

were carried out via a series of 25 injections of 1.25  $\mu\text{L}$  each. The data were corrected by subtracting the mixing enthalpies for the AA1 or ABA solutions into protein-free solutions and fitted by Origin for ITC (GE Healthcare Bio-Sciences AB) with a 1/1 binding model.

**Wheat receptor-mediated PP2C inhibition assays.** Wheat ABA receptor (TaPYL) and PP2C4 proteins were obtained as previously described (14). The concentration of enzymatically active TaPP2C4 protein was determined by titration against AtPYL10 protein in the presence of saturating 10  $\mu\text{M}$  ABA. Subsequently active wheat ABA receptor concentrations were estimated using various concentrations of active TaPP2C4 protein in the presence of ABA. For PP2C activity assays, purified proteins were preincubated in 80  $\mu\text{l}$  of buffer containing 12.5 mM  $\text{MnCl}_2$ , 0.125% 2-mercaptoethanol, 3  $\mu\text{g}$  BSA and test compounds at 30  $^\circ\text{C}$  for 10 min. Reactions containing 25 nM TaPP2C4 and 50 nM TaPYL proteins were started by adding 20  $\mu\text{l}$  of substrate buffer (165 mM Tris-acetate, pH 7.9, 330 mM potassium acetate, 1 mg/mL BSA and 5 mM 4-methylumbelliferyl phosphate) (13). Fluorescence intensities were immediately measured using 360 nm excitation filter and 465 nm emission filter on a SPARK 10M (TECAN).  $\text{EC}_{50}$  values were calculated for recovery of PP2C activities in the presence of 5,000 nM ABA with different concentrations of test compound using a model using the drc (dose response curves) package (9).

**Brachypodium receptors mediated phosphatase inhibition assays.** Recombinant proteins were purified as described previously (15) and were used for PP2C inhibition assay. Each reaction contained 1.2  $\mu\text{M}$  recombinant PP2C and 3.6  $\mu\text{M}$  recombinant receptor in 33 mM Tris acetate (pH 7.9), 66 mM potassium acetate, 0.1% bovine serum albumin, 10 mM  $\text{MnCl}_2$ , 0.1%  $\beta$ -ME, 50 mM pNPP, 0.25  $\mu\text{M}$  +ABA and increasing concentrations of AA1 (0, 1, 5, 10, 25, and 50  $\mu\text{M}$ ). The reaction was monitored for pNPP hydrolysis at  $A_{405}$ . Recombinant GST-BdPP2C44 activity (as a percentage) was measured in the presence of recombinant 6XHIS-BdPYL1, 6XHIS-BdPYL2 and GST-BdPYL3. The activity of BdPP2C44 was measured for 10 minutes and phosphatase activity was calculated during 2 minutes in the linear phase of the reaction with three replicates. All reactions were analysed three minutes after the reaction started. Values represent percentage activity compared with phosphatase activity in the presence of a receptor only (without ABA or AA1).

**Yeast two-hybrid assays with Brachypodium receptors.** *Arabidopsis* receptors were examined for PP2C interactions by using X-gal staining to monitor  $\beta$ -galactosidase reporter gene expression levels. Individual clones were spotted onto SD–LT glass round plates containing 1  $\mu\text{M}$  ABA, 1  $\mu\text{M}$  ABA with 50  $\mu\text{M}$  AA1 and 0.1% Mock control (DMSO). Following incubation at 28  $^\circ\text{C}$  for 2 days, colonies were chloroform lysed and stained to estimate  $\beta$ -galactosidase accumulation, as described previously (4).

**In vitro pull-down assays.** GST-HAB1 used in this assay was expressed and purified as previously described (4). Reaction mixtures including 25  $\mu\text{g}$  of His6-Pyr1 and 250  $\mu\text{g}$  of GST-HAB1 (1.05 and 3.05  $\mu\text{M}$  each) in 1ml of TBS buffer with 1 mM  $\text{MnCl}_2$  and chemicals were incubated at RT for 1.5 hr and extended incubation with 30mg of His-tagged protein purification resin (PrepEase, USB) for 30min. The resin was collected by brief centrifugation and washed 5 times with TBS containing 1 mM  $\text{MnCl}_2$ . Proteins were released by boiling with SDS sample buffer and analyzed by SDS PAGE. ABA and ANT reactions included 10  $\mu\text{M}$  each, and ABA/ANT ratio was 10:50 in  $\mu\text{M}$  respectively.

**Arabidopsis ABA-reporter gene analyses.** For ABA-responsive reporter gene analyses, transgenic *Arabidopsis* expressing  $\beta$ -glucuronidase (GUS) under the control of the

AtMAPKKK18 promoter were used as previously described (3). Seedlings were grown on agar plates containing 1/2 MS and 0.5% sucrose for 6 days at 22°C and an 18/6-h light/dark cycle. Transgenic seedlings were transferred to an incubation solution containing 1/2 MS and 0.5% sucrose and acclimated in the incubation solution overnight before chemical treatment. For ABA agonist and antagonist analyses, a single chemical or a mixture was added to the incubation solution with seedlings and then incubated for 6 h under the 22°C light condition. For osmotic stress analysis, seedlings were transferred to 400 mM mannitol solution containing 1/2 MS, 0.5% sucrose and chemicals, and incubated for 6 h under the 22°C light condition. GUS detection was performed in reaction buffer containing 50 mM sodium phosphate (pH 7.0), 0.05% Tween-20, 5 mM potassium ferrocyanide, 5 mM potassium ferricyanide and 1 mM 5-bromo-4-chloro-3-indolyl- $\beta$ -D-glucuronide (X-gluc) at 37°C. The reaction was stopped by adding ethanol (EtOH), and the chlorophyll pigment of the seedlings was bleached with 70% EtOH at 65°C. GUS staining was observed using stereo and optical microscopes.

**Arabidopsis qRT-PCR experiments.** Eight-day-old seedlings of *Arabidopsis thaliana* wild-type (Col-0) were pretreated with 1/2 Murashige-Skoog (MS) liquid medium (0.25% sucrose, pH 5.7) supplemented with either DMSO control or 25  $\mu$ M ANT for 4 hours, and then exposed to either DMSO or 25  $\mu$ M ANT in the presence or absence of 20% PEG for another 6 hours. Each treatment was conducted in biological triplicate. The total RNA was extracted using the RNeasy Plant Mini Kit (QIAGEN, Cat No. 74904), and cDNA was synthesized by QuantiTect Reverse Transcription Kit (QIAGEN, Cat No. 205311). Quantitative RT-PCR was performed with CFX Connect Real-Time PCR Detection System using Maxima SYBR Green/Fluorescein qPCR Master Mix (Thermo Scientific, Cat No. K0242). The relative expression level of the ABA-responsive genes was normalized against the reference gene *AtPEX4* by  $\Delta C_T$  Method. Statistical tests were performed using the raw  $\Delta C_T$  values, the two-way ANOVA test was performed to test the significance of the differences between all the treatments, different lowercase letters indicate significant differences as assessed by the pairwise Tukey test.

The primers used in the experiments are listed as follows.

*AtPEX4*: 5'CAGTCCTCTTAAGTGGCGACTC3', 5'GGCGAGGCGTGATACATTT3'  
*AtMAPKKK18*: 5'CACACTTGTCTGGTGAGTTCG3', 5'GGAGAGATGGACAGCGAGTC3'  
*AtRD29B*: 5'TGGTGGGGAAAGTTAAAGGA3', 5'GGAATCCGAAAACCCCATAGTCC3'

**Wheat qRT-PCR experiments.** Wheat (cv. Chinese Spring) seeds were imbibed in water for 2 days at 4°C, and subsequently placed under the light condition at 22°C for 2 days. Germinated seeds were hydroponically cultivated in 1/10 $\times$  Hoagland's solution at 22/18 °C (day/night) under a 14-h light/10-h dark photoperiod in a growth chamber. Root parts of seven-day-old seedlings were soaked in 1/10 $\times$  Hoagland's solution containing each 5  $\mu$ M compound for 12h. The shoot and root parts were cut off, and frozen in liquid nitrogen and then ground to a powder with Mixer Mill MM 400 (Verder Scientific). Total RNA was extracted using a Plant Total RNA purification kit (GMBiolab, Taichung, Taiwan) and was reverse-transcribed using RevTra Ace qPCR RT Master Mix with gDNA Remover (Toyobo). qRT-PCR was performed on a LightCycler 96 System (Roche) using KOD SYBR qPCR Mix (Toyobo). The relative amounts of target transcripts were determined using the relative standard curve method and were normalized by the relative amount of internal control transcripts. *TaActin* (forward primer 5'-CCTCTCTGCGCCAATCGT-3', reverse primer 5'-TCAGCCGAGCGGGAAATTGT-3') was used as internal standards, whereas *TaLEA* (forward primer 5'-GACAACACCATCACCACCAAGGACA-3', reverse primer 5'-TAATACAGAACCGGACACGAGGAGT-3'), *TaPP2C6* (forward primer 5'-

ACGAGTGCCTGATCCTAGCCAG-3', reverse primer 5'-GGAGATGTTGTCCGAGCTGTTCTT-3') were used as ABA responsive genes. Significance was determined using Tukey's test.

**Thermoinhibition assays.** To establish if ANT blocks thermoinhibition, we conducted assays as follows. Surface sterilized Arabidopsis seeds ( $n > 25$  seeds; seeds were harvested six months prior to the experiment) were plated in 24 well polystyrene petri plates on 0.7% agar medium containing 1/2-x MS salts, 0.5% sucrose, and 30  $\mu\text{M}$  ANT, fluridione, or mock untreated control (0.3% v/v DMSO). After 96hrs of stratification at 4°C, the plates were either heat treated at 37°C (in darkness for 48 hrs), or transferred directly to an imaging cabinet used to acquire images at regular intervals. After heat treatment, the plates were transferred to the imaging cabinet and photographed every 5h. Germination was scored as positive based on radicle emergence and the  $\text{ET}_{50}$  (time at which 50% of seeds have germinated) values were inferred by fitting the germination data over time to a 4 parameter log-logistic model in the drc (dose response curves) package (9). Continuous monitoring of germination was conducted under dim illumination (under LED illumination at 12  $\mu\text{mol}/\text{m}^2/\text{s}$ ) at room temperature (25 °C).

**Seed germination rate ( $\text{ET}_{50}$ ) measurements.** Experiments examining the effects of ANT on germination were conducted as follows. Surface sterilized seeds were plated onto polystyrene petri plates on 0.7% agar medium containing 1/2X- MS salts and carrier solvent (DMSO; 0.2% v/v) or ANT (Arabidopsis 50  $\mu\text{M}$ , tomato 25  $\mu\text{M}$ , barley 100  $\mu\text{M}$ ). All experiments were completed in triplicate with 15 tomato and barley seeds per replicate. Plates were immediately transferred to a growth chamber with 22°C under 16 hour day/8hr night illumination. Germination was manually quantified and the  $\text{ET}_{50}$  (time at which 50% of seeds have germinated) was calculated using a log-logistic model using the drc (dose response curves) package in R.

**Thermography experiments.** Chemicals were directly applied to soil in case of Arabidopsis or as aerosols in case of tomato in a solution composed of 0.2 v/v% DMSO and 0.02% v/v Silwet-77 (Lehle seeds) for Arabidopsis or 0.05% Silwet-77 for experiments with tomato and wheat. Pot positions within each experiment were randomized to control for microenvironmental differences in the growth cabinet. Leaf temperatures were obtained using a FLIR T62101 camera and averaged from 10-15  $\sim 1 \text{ cm}^2$  leaf area spots per replicate pot using FLIR software. Col-0 seeds were either plated on 1/2 MS, 0.5% w/v sucrose, 0.7% agar plates containing no chemical (mock treated) or 100  $\mu\text{M}$  ANT. Simultaneously abi1C seeds were also plated on 1/2 MS, 0.5% w/v sucrose, 0.7% agar plates. After 4 days of stratification at 4°C, plates were grown in a light chamber with controlled humidity for another 7 days, after which seedlings were transferred to soil in 4 inch pots (2 plants per pot;  $n = 12$  pots per treatment). Seedlings germinated on ANT were continuously exposed to ANT by addition of 2.5 mL of solutions of ANT (100  $\mu\text{M}$  in water + 0.2% v/v DMSO) every other day directly to the soil for three weeks, while mock treated seedlings were exposed identically to 2.5 mL mock solution treatment (water + 0.2% v/v DMSO). Plants were grown under 18 hour days at  $\sim 25$  °C. For a single treatment experiment, Col-0 seeds were plated on 1/2 MS, 0.5% w/v sucrose, 0.7% agar plates with or without added test chemical. After 4 days of stratification at 4°C, plates were grown in a light chamber with controlled humidity for another 7 days, after which seedlings were transferred to soil in 4 inch pots (2 plants per pot;  $n = 10$  pots per treatment) and grown until the plants were 3 weeks old. Plants were sprayed with 20 mL of 100  $\mu\text{M}$  ANT solution and images after 48 hr. Experiments conducted on tomato (UC82) used  $\sim 6$  week old seedlings (1 plant per pot,  $n=8$  for per treatment) and 20 mL solution of 100  $\mu\text{M}$  ANT.



Experiments conducted on wheat (Patwin 515) used ~3 week old seedlings (10 - 15 plants per pot, n = 9 for per treatment) and 20 mL solution of 100uM ANT. Plants were grown under continuous exposure to light (under LED illumination at  $120 \mu\text{mol}/\text{m}^2/\text{s}$  ) at  $\sim 25^\circ\text{C}$  and photographed after 2 hr.

**Chemicals & syntheses.** Target molecules were synthesized according to the schemes depicted in (**Supplemental Figure 1 and 3**). Reactions were carried out under an atmosphere of argon in oven-dried glassware, unless otherwise stated. Indicated reaction temperatures refer to those of the reaction bath, while room temperature (rt) is noted as 25 °C. All solvents were of anhydrous quality purchased from Aldrich Chemical Co. and used as received. Pure reaction products were typically dried under high vacuum. Commercially available starting materials and reagents were purchased from Aldrich, TCI, Fisher Scientific, Combiblocks and AK Scientific and used as received. Analytical thin layer chromatography (TLC) was performed on 60 Å, 250 µm silica TLC plates. <sup>1</sup>H NMR and <sup>13</sup>C NMR spectra were recorded on a Bruker 700 MHz NMR and chemical shifts reported in ppm using the solvent resonance as internal standard ([DMSO-d<sub>6</sub> 2.5 ppm] for <sup>1</sup>H, <sup>13</sup>C respectively). NMR data are reported as follows: chemical shift, multiplicity (s = singlet, d = doublet, dd = doublet of doublet, t = triplet, q = quartet, br = broad, m = multiplet), number of protons, and coupling constants. Product exact masses were obtained by analysis on an Agilent 6224 ESI TOF in positive ion mode after LC separation. All compounds used for biological testing were ≥ 95% pure. (+)-ABA was purchased from BioSynth, AA1 was purchased from Life Chemicals and its structure confirmed by <sup>1</sup>H NMR, which we collected after we observed numerous biochemical results that were inconsistent with previous reports of AA1-mediated antagonism of ABA receptor activity (16); our analytical data confirming the identity of AA1 are shown below along with analytical section for newly synthesized compounds. TAMRA-5-azide was purchased from LumiProbe, BTAA was purchased from Click Chemistry Tools and PanMe was synthesized according to an established procedure (17).

## Syntheses

**Methyl (4-amino-3,5-dibromophenyl)acetate (1a).** To a solution of Methyl (*p*-aminophenyl)acetate (5 g, 30.26 mmoles, 1 equiv) in anhydrous methanol was added ammonium bromide (5.93 g, 60.52 mmoles, 2 equiv) followed by oxone (9.21 g, 60.52 mmoles, 2 equiv) portion wise and the reaction stirred overnight. After completion of reaction (TLC), the reaction was concentrated in vacuo, adsorbed on silica and purified by silica gel flash chromatography using hexane/ethyl acetate gradient to yield 4.63 g of **1a** as a pale yellow solid in 48% yield.

**Methyl (4-amino-3,5-dicyclopropylphenyl)acetate (1b).** To a solution of **1a** (3.72 g, 11.52 mmoles, 1 equiv) in toluene/water (12 ml toluene: 600 µL water) was added K<sub>3</sub>PO<sub>4</sub> (8.56 g, 40.31 mmoles, 3.5 equiv), P(Cy)<sub>3</sub> (323 mg, 1.15 mmoles, 0.1 equiv), Pd(OAc)<sub>2</sub> (129.3 mg, 0.578 mmoles, 0.05 equiv) and cyclopropyl boronic acid (2.47 g, 28.8 mmoles, 2.5 equiv) and heated in a pressure vessel at 110°C for 3 hours. After completion of reaction (TLC), the reaction was concentrated in vacuo, adsorbed on silica and purified by silica gel flash chromatography using hexane/ethyl acetate gradient to yield 2.63 g of **1b** as a off white crystalline solid in 93 % yield.

**(4-Amino-3,5-dicyclopropylphenyl)acetic acid (1c).** To a solution of **1b** (2.63 g, 10.73 mmoles, 1 equiv) in 20 mL of methanol/water (1:1 v/v) was added lithium hydroxide (2.57 g, 107.3 mmoles, 10 equiv) and stirred at room temperature for 24 hr. After completion of reaction (TLC), the reaction, 2N HCl was added to precipitate the product, **1c** as a white solid (near quantitative yield) which was filtered, dried and used in the next step without further purification.

**(4-Azido-3,5-dicyclopropylphenyl)acetic acid (1d).** To an ice cold solution of **1c** (0.9 g, 3.89 mmoles, 1 equiv) in acetonitrile/water (1:1) was added concentrated hydrochloric acid dropwise 5 mL, followed by a cold aqueous solution of sodium nitrite (0.4 g, 5.84 mmoles, 1.5 equiv). The reaction stirred at 0°C for 20 min. Thereafter a cold aqueous solution of sodium azide (0.76g, 11.67 mmoles, 3 equiv) was added dropwise so as to control the effervescence of nitrogen gas observed. The reaction was stirred at 0°C for a further 1 hr and left to attain room temperature overnight. After completion of reaction (TLC), 2N HCl was added to the reaction mixture, and the reaction extracted three times with ethyl acetate (30 mL). The organic extracts were combined and dried over anhydrous sodium sulfate and concentrated in vacuo. The residue was adsorbed on silica gel and purified by flash chromatography using a hexane/ethyl acetate gradient to yield 0.82 g of **1d** as an off white solid in 83% yield.

**Methyl 1-[2-(4-azido-3,5-dicyclopropylphenyl)acetylamino]cyclohexanecarboxylate (2a).** To an ice cold solution of **1d** (0.82 g, 3.18 mmoles, 1 equiv) in anhydrous dichloromethane was added 1-aminocyclohexanoate (0.6 g, 3.82 mmoles, 1.2 equiv), EDCI (0.91 g, 4.77 mmoles, 1.5 equiv) and DMAP (0.58g, 4.77 mmoles, 1.5 equiv) and the reaction stirred overnight at room temperature. After completion of reaction (TLC), the reaction was concentrated in vacuo, adsorbed on silica and purified by silica gel flash chromatography using hexane/ethyl acetate gradient to **2a** as a off white solid in near quantitative yield.

**1-[2-(4-Azido-3,5-dicyclopropylphenyl)acetylamino]cyclohexanecarboxylic acid (2b; OPZ).** To a solution of **2a** (0.4 g, 1.01 mmoles, 1 equiv) in methanol/water 20 mL (1:1 v/v) was added lithium hydroxide (0.48 g, 20.2 mmoles, 20 equiv) and stirred at RT for 24 hr. After completion of the reaction (TLC), 2N HCl was added to the reaction mixture to precipitate the product as a white solid in near quantitative yields. The product is extremely light sensitive and stored at -20°C until further use.

**N-2 Propynyl-6-fluoro-2-quinolinecarboxamide (3o).** To a solution of the precursor acid (250 mg, 1.31 mmoles, 1 equiv) in anhydrous DCM at 0°C was added propargyl amine (86.4 mg, 1.57 mmoles, 1.2 equiv). To this mixture were added EDCI (376 mg, 1.96 mmoles, 1.5 equiv) and DMAP (192 mg, 1.57 mmoles, 1.2 equiv) and the reaction allowed to come to room temperature and further stirred for 12 hrs. After completion of reaction, brine was added to the reaction and extracted three times with dichloromethane, the organic extracts were combined and dried over anhydrous sodium sulfate and concentrated *in vacuo*. The residue was purified using flash chromatography using a hexane/ethyl acetate gradient to yield the corresponding amides **3n** as a white powder. Similar protocol was applied for synthesis of propargyl amides **3a-3p** which were obtained in 70-90 % yields as solid powders.

**Synthesis of ANT (4o).** To a solution of the OPZ (75 mg, 0.19 mmoles, 1 equiv) in DMSO/Water (4:1 v/v) at RT was added propargyl amides **3o** (44.7 mg, 0.19 mmoles, 1 equiv). To this mixture was added BTAA (33.7 mg, 0.078 mmoles, 4 equiv), sodium ascorbate (23.3 mg, 0.12 mmoles, 0.6 equiv) and copper sulfate (6.3 mg, 0.039 mmoles, 0.2 equiv) the reaction stirred at room temperature and stirred for further 48 hrs. After completion of reaction, 2N HCl was added to the reaction and the precipitated triazole antagonist filtered through a sintered funnel. The solid was thoroughly washed (3-5 times the reaction volume) with distilled water and dried in the oven to yield solid white powder **4o**. Similar protocol was applied for synthesis of other triazole antagonists **4a-4p** which were obtained in 80-90 % yields as solid powders.

**Synthesis of alkyne 4q.** Aryl bromide **4p** (400 mg, 0.6 mmoles, 1 equiv), CuI (22.8 mg, 0.12 mmoles, 0.2 equiv) and Palladium(II)bis(triphenylphosphine) dichloride (84.2 mg, 0.12 mmoles, 0.2 equiv) were added to oven-dried schlenk flask. The schlenk flask was evacuated and refilled with argon, this process repeated thrice. 5 mL of anhydrous DMF, trimethylsilylacetylene (294 mg, 3 mmoles, 5 equiv) and triethylamine (183 mg, 1.8 mmoles, 3 equiv) were added to the flask and the reaction mixture stirred in a heated oil bath at 60°C overnight. After completion of reaction, brine was added to the reaction and extracted three times with ethyl acetate, the organic extracts were combined and dried over anhydrous sodium sulfate and concentrated *in vacuo*. The residue so obtained was dissolved in anhydrous methanol (10 mL) and treated with catalytic quantities of potassium carbonate (~5-10 mg) at room temperature for 3 hrs to effect deprotection of trimethylsilyl group. After completion of the reaction, silica gel was directly added to the reaction and the reaction concentrated *in vacuo*. The product was purified using flash chromatography using a hexane/ethyl acetate gradient to yield 180 mg of a yellow solid- alkyne **4q** in 49 % yield over two steps.

**Synthesis of TAMRA-ANT (4r).** Commercially available TAMRA-5-azide (100 mg, 0.19 mmoles, 1 equiv) was dissolved in DMSO (3 mL) and added to a small glass vial covered with aluminum foil to protect from light. To this a solution of alkyne **4q** (120 mg, 0.19 mmoles, 1 equiv) in DMSO (1 mL) was added followed by BTTAA (67 mg, 0.16 mmoles, 0.8 equiv). To this was added a solution of sodium ascorbate (31 mg, 0.16 mmoles, 0.8 equiv) in 500 µL water followed by a solution of copper sulfate (12.5 mg, 0.08 mmoles, 0.4 equiv) in 500 µL water. The dark-pink reaction was protected from light and stirred at room temperature for 48 hrs. After completion of reaction distilled water (20 mL) was added to the reaction to precipitate the triazole which was filtered through a sintered funnel and washed 5 times with distilled water (10 mL) and subsequently dried to give the pure triazole as a dark pink powder in near quantitative yields. The product is light sensitive and stored at -20°C until further use.

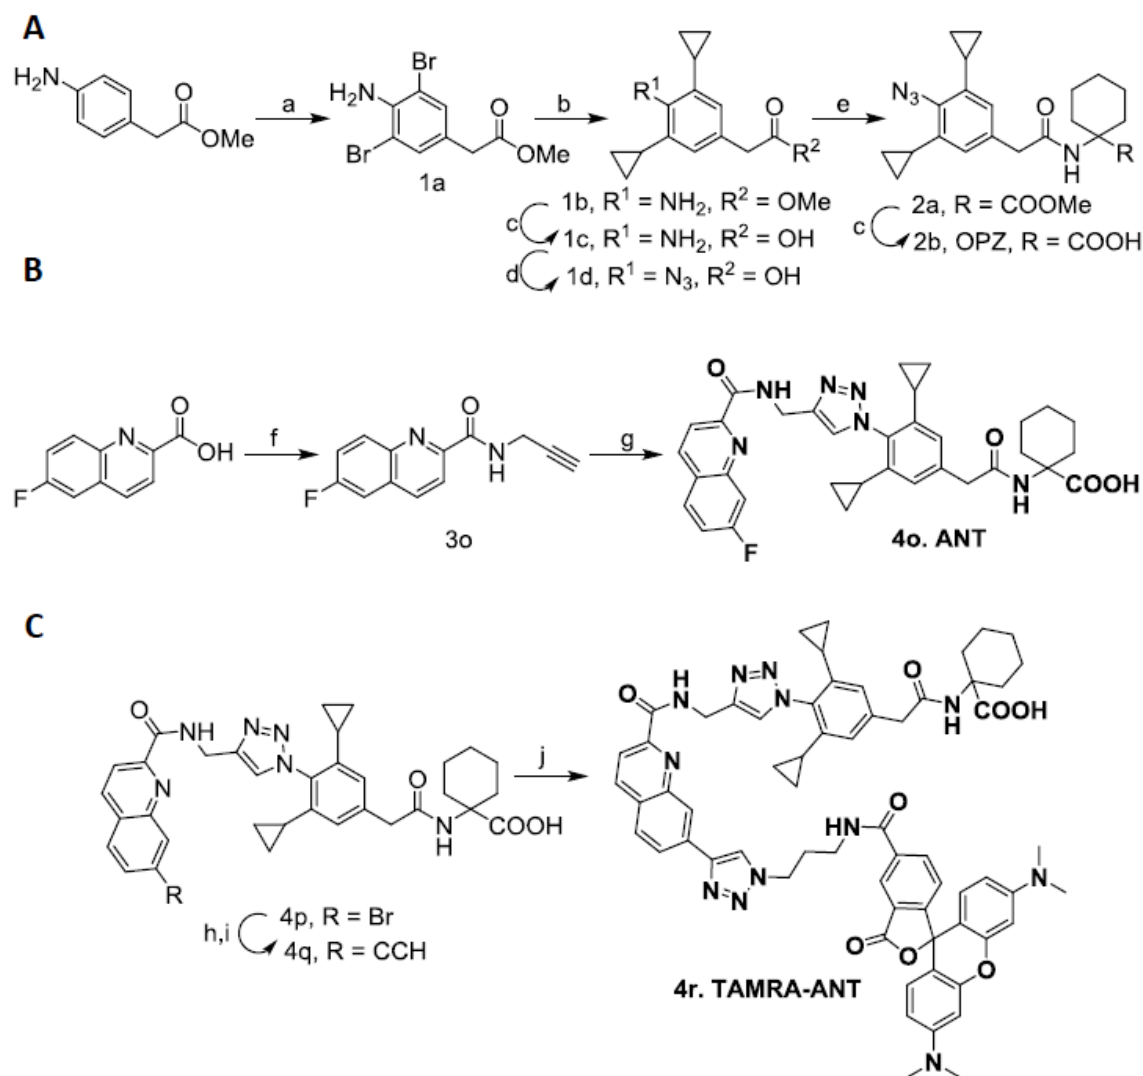

**Fig. S1. Synthesis of OPZ (A), ANT (B) and TAMRA-ANT (C).** Reagents and conditions: (a) Ammonium bromide, oxone, MeOH, 12 hr; (b) Cyclopropyl boronic acid, K<sub>3</sub>PO<sub>4</sub>, P(Cy)<sub>3</sub>, Pd(OAc)<sub>2</sub>, Toluene/water, 110°C, 3 hr; (c) LiOH, MeOH/H<sub>2</sub>O, RT, 24 hr; (d) NaNO<sub>2</sub>, HCl, NaN<sub>3</sub>, 0°C-RT, 12 hr; (e) Methyl 1-aminocyclohexanoate, EDCI, DMAP, DCM, 0°C-RT, 12 hr; (f) EDCI, DMAP, DCM, 0-RT, 12 hr; (g) OPZ, BTTAA, sodium ascorbate, copper (II) sulfate, DMSO/H<sub>2</sub>O, RT, 48 hr; (h) Aryl bromide-**4p**, Cu(I), Palladium (II)bis(triphenylphosphine)dichloride, trimethylsilylacetylene, 60°C, 12 hr; (i) catalytic potassium carbonate, MeOH, RT, 3 hrs. (j) TAMRA-5-azide, BTTAA, sodium ascorbate, copper (II) sulfate, DMSO/H<sub>2</sub>O, RT, 48 hr.

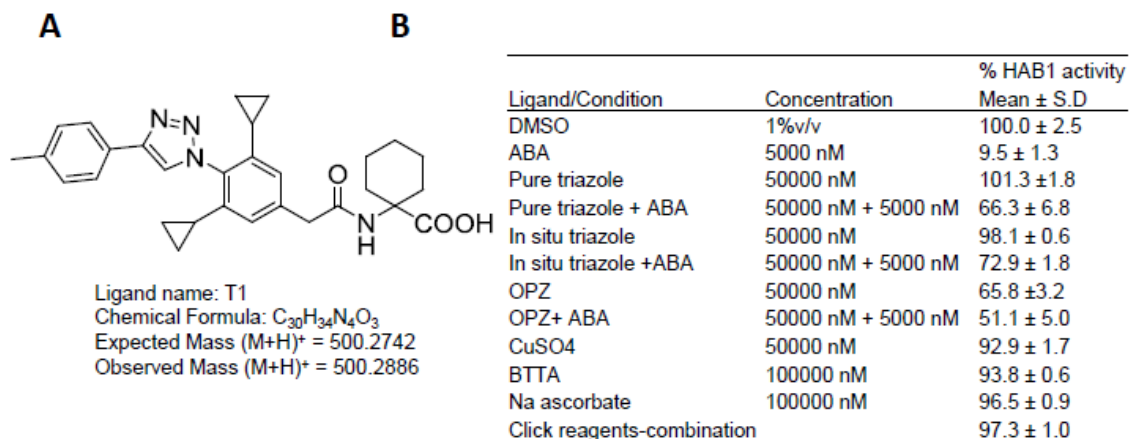

**Fig. S2:** (A) Structure and observed HRMS data for triazole T1 (detailed NMR characterization are provided in analytical section); (B) ABA/PYR1-mediated PP2C activity in different conditions tested: *in situ* generated versus purified OP-4-triazole, OPZ, and different click reagents on their own or combinations.

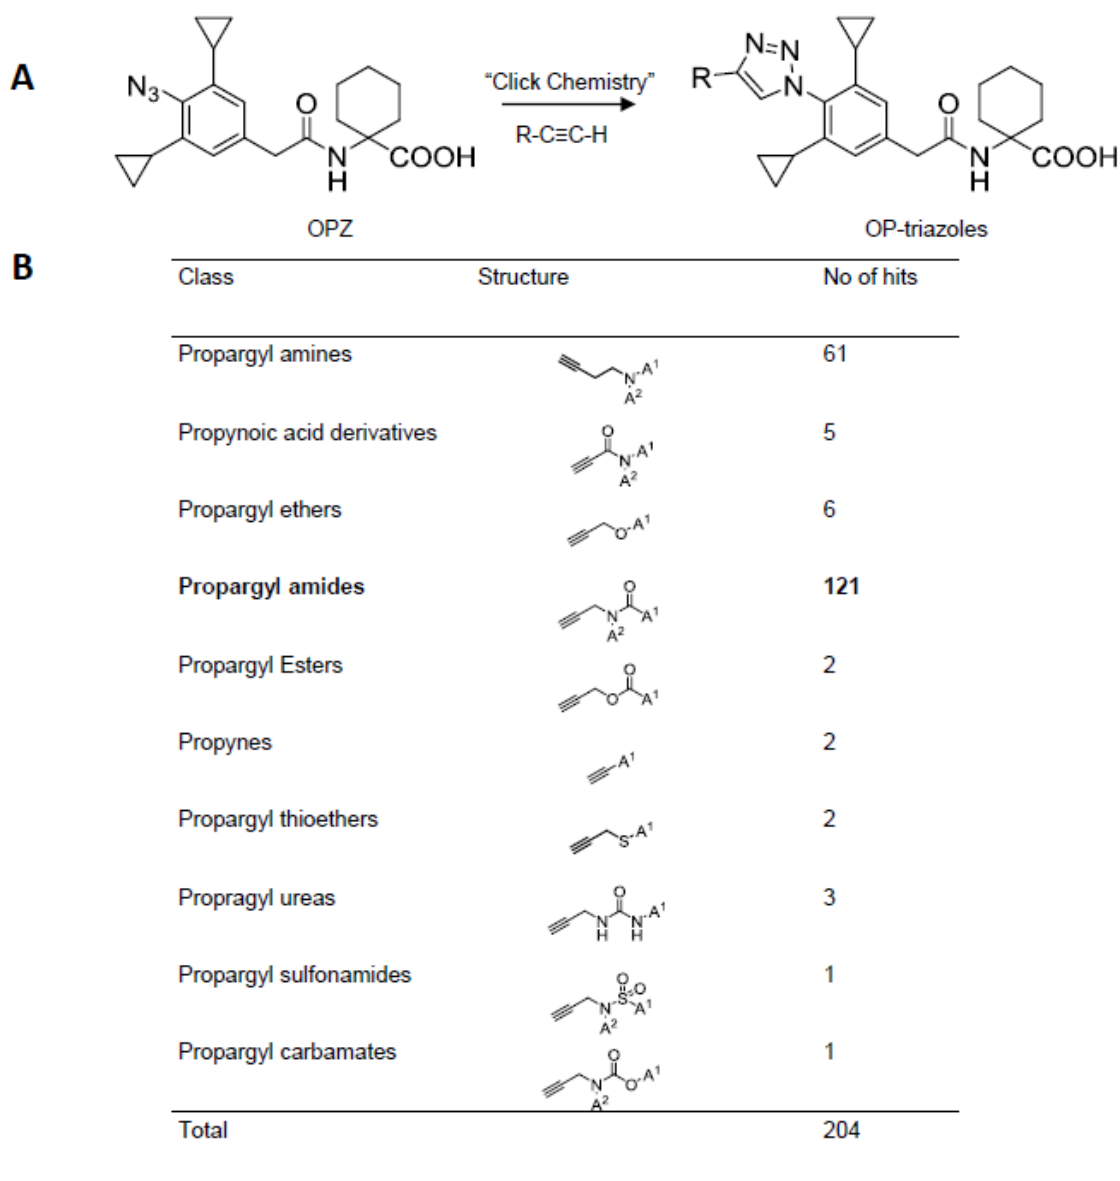

**Fig. S3. Structural diversity of R-groups identified as OP-4-triazole antagonists.** (A) General scheme for the synthesis of 4-OP-triazoles by clicking OPZ against a collection of alkynes. (B) Classification of alkyne building blocks that produced PYR1 antagonist hits; propargyl amides, which produce OP-4-peptidotriazoles after clicking with OPZ, produced the most frequent hits. A1 and A2 represent aryl/alkyl substituents or hydrogen atoms. Building block structures, screening data, and details on specific hit molecules that were resynthesized are available in **S. Data file 1**.

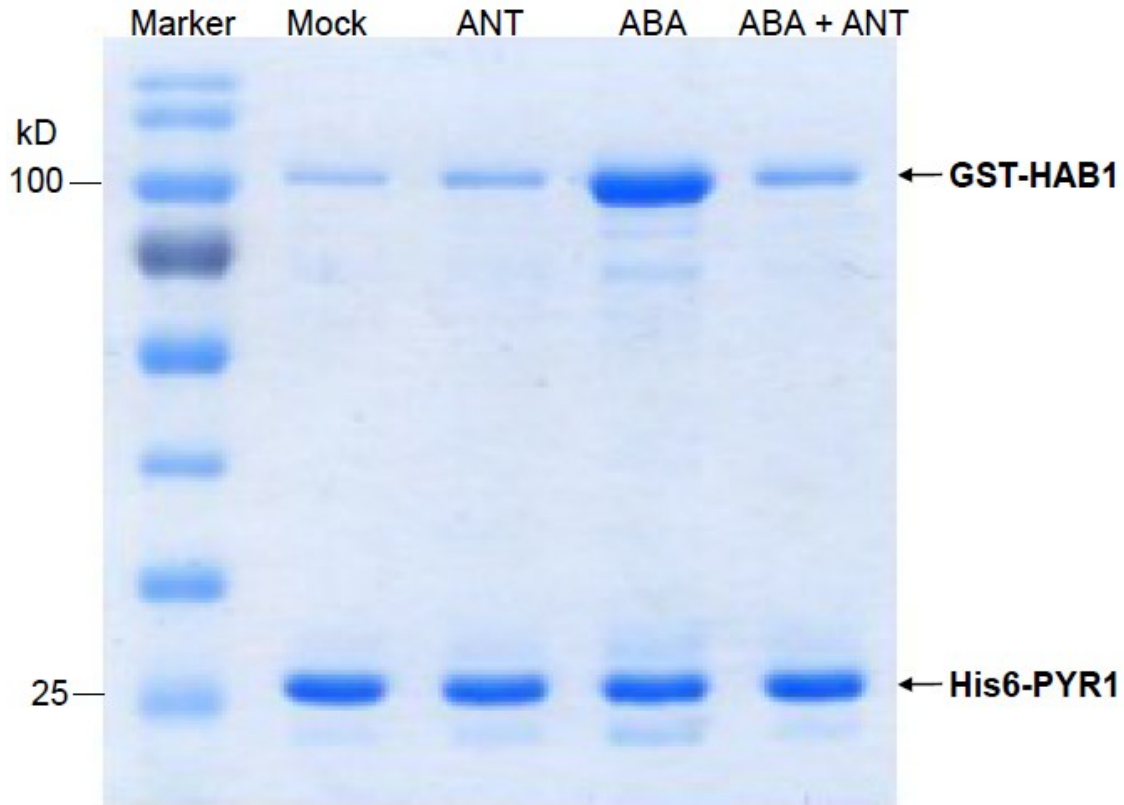

**Fig. S4. ANT blocks the physical interaction between recombinant Arabidopsis PYR1 and HAB1 *in vitro*.** Reaction mixtures including 25  $\mu\text{g}$  of 6xHis-PYR1 and 250  $\mu\text{g}$  of GST-HAB1 (1.05 and 3.05  $\mu\text{M}$  each) in 1 ml of TBS buffer with 1 mM  $\text{MnCl}_2$  and chemicals (ABA -10 $\mu\text{M}$  or ANT-10 $\mu\text{M}$  or their combination ABA(10 $\mu\text{M}$ ) +ANT(50 $\mu\text{M}$ )) were incubated at room temperature for 1.5 hr, after which 30 mg of His-tagged protein purification resin (PrepEase, USB) was added for an additional 30 min. The resin was collected by brief centrifugation and washed 5 times with TBS containing 1 mM  $\text{MnCl}_2$ . Proteins were released by boiling with SDS sample buffer and analyzed on SDS-PAGE



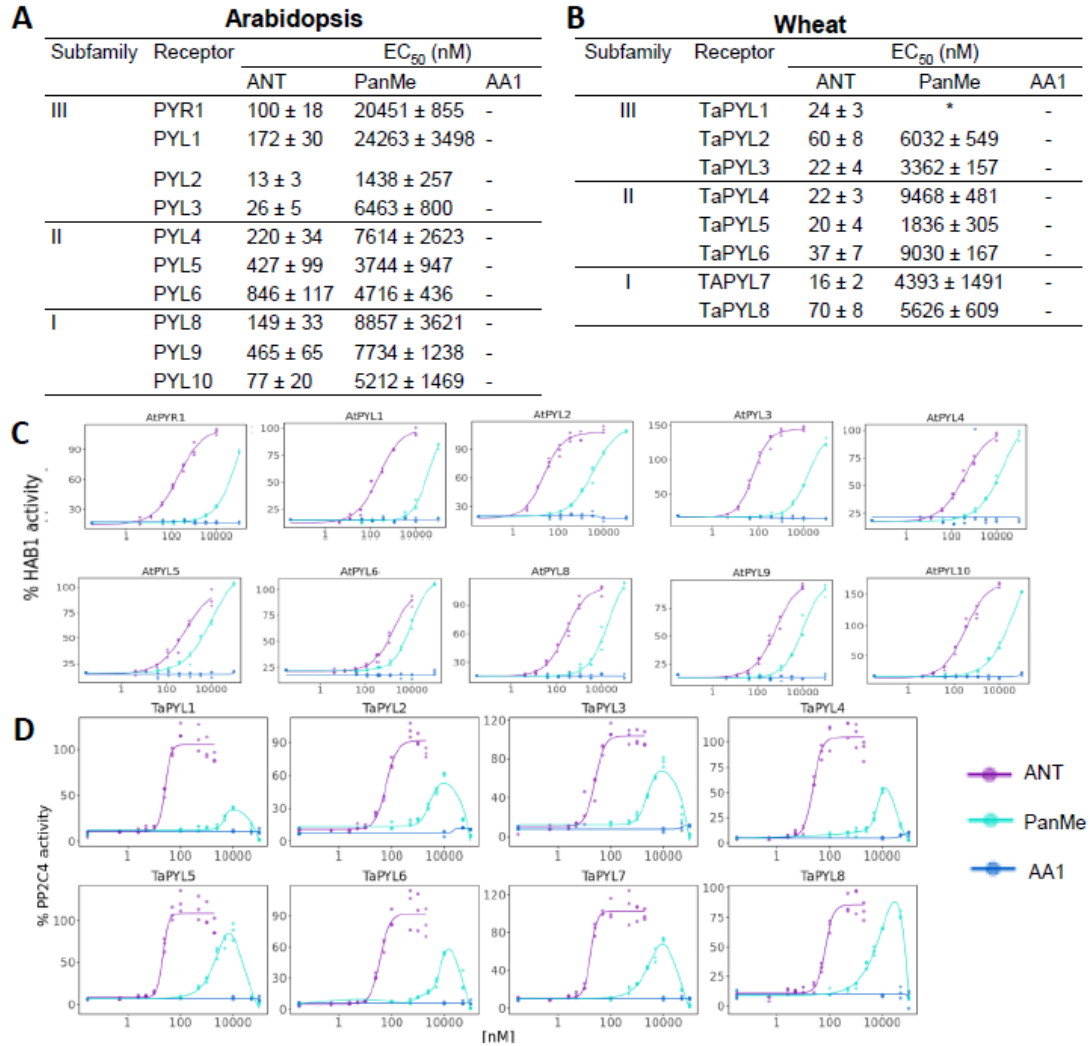

**Fig. S5. ANT potently antagonizes effects of ABA mediated receptor activation in Arabidopsis and Wheat.** (A) and (B) Quantification of antagonist-mediated recovery of Arabidopsis HAB1 or wheat PP2C4 activity for different ABA receptors at saturating ABA concentrations (5000 nM). Arabidopsis ABA receptors were tested at 25 nM, wheat receptors at 50 nM, PP2Cs tested 50 nM. The EC<sub>50</sub> values indicate the concentration of antagonist (nM) at which 50% recovery of phosphatase activity is observed. Errors indicate the standard deviation of triplicate measurements. “-” indicates that no statistically significant change in HAB1 activity was observed up to 100 μM; “\*” indicates that the maximal PP2C recovery does not exceed 50%. (C and D) Dose response curves from which EC<sub>50</sub> values were obtained. EC<sub>50</sub> values were inferred by fitting the dose response data to the 4 parameter log-logistic equation using the drc R package. These data show the complete dose response data collected for Arabidopsis and wheat receptors; a subset of these data (for Arabidopsis PYR1, PYL5, and PYL8) are plotted and shown in Fig. 2 of the main text.

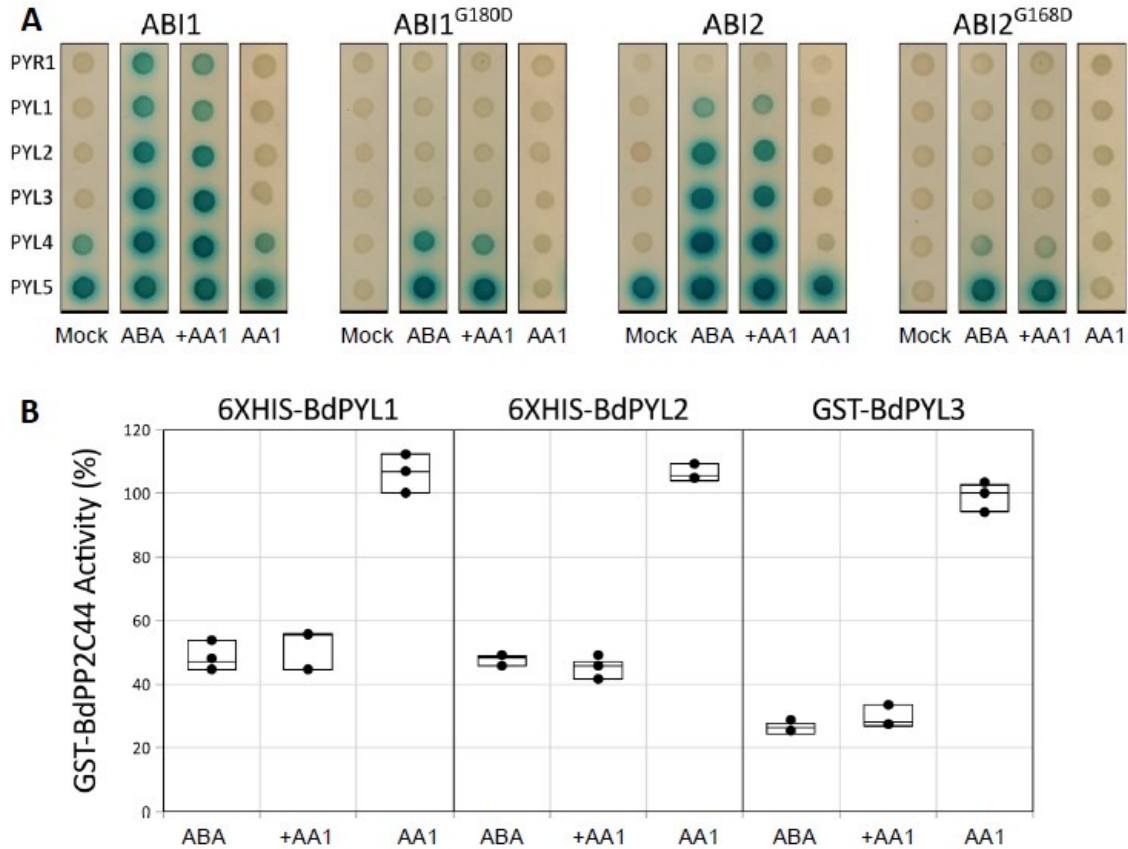

**Fig. S6. AA1 does not antagonize *Brachypodium* ABA receptors. (A)** AA1 has no effect on ABA-induced interaction between *Arabidopsis* receptors and PP2Cs as measured using a yeast two-hybrid assay. Binding domain fused receptors were tested for interaction with activating domain fused PP2C in yeast. Interactions were tested in the presence of AA1 (50  $\mu$ M), ABA (0.25  $\mu$ M), AA1 + ABA (50/0.25  $\mu$ M; lane “+AA1”), or mock control. **(B)** AA1 has no effect on *Brachypodium* PP2C44 ABA-induced phosphatase activity inhibition. The phosphatase activity (% control) of recombinant GST-BdPP2C44 was measured in the presence of BdPYL recombinant receptors (6XHIS-BdPYL1, 6XHIS-BdPYL2, and GST-BdPYL3) and 5  $\mu$ M AA1, 0.25  $\mu$ M ABA or combination of the two and is presented relative to a no-agonist/antagonist mock control. GST-BdPP2C44 was measured using p-nitrophenyl phosphate(pNPP) substrate over 10 minutes with three technical replicates. Error bars represent  $\pm$  1 SE.

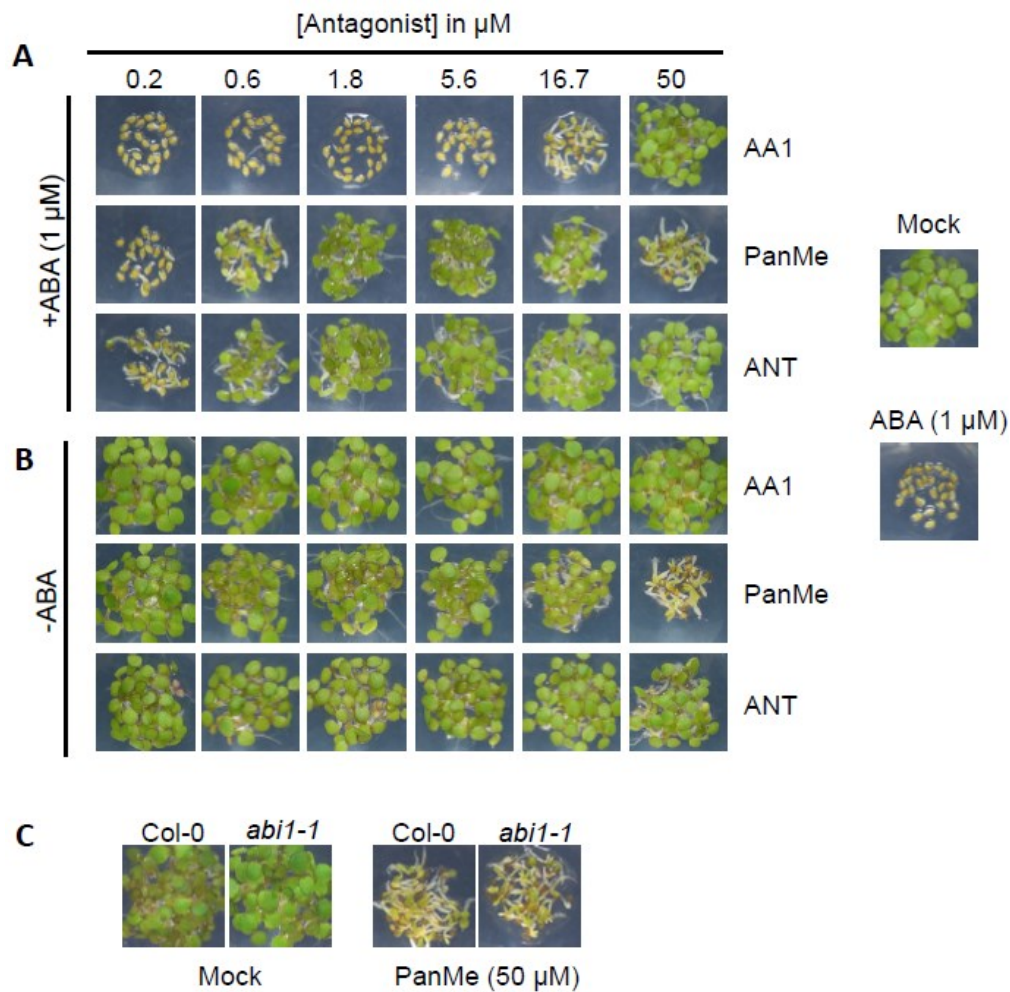

**Fig. S7. ANT reverses the inhibitory effect of ABA on Arabidopsis seedling establishment.** Dose-dependent effects of AA1, PanMe, and ANT on Columbia seedling establishment in the presence **(A)** or absence **(B)** of ABA (1  $\mu\text{M}$ ). **(C)** PanMe inhibits seedling establishment at high concentrations and its inhibitory effects are independent of ABA signaling. Seeds were sown on 1/2 $\times$  MS agar plates containing chemicals, stratified at 4  $^{\circ}\text{C}$  for 4 days, and then transferred to a growth chamber at 22  $^{\circ}\text{C}$  under 16 hour days. Photographs were taken after 4 days. The high-concentration growth inhibitory effects of PanMe are evident in both *Col-0* and *abi1-1*, suggesting that PanMe has phytotoxicity unrelated to ABA signaling.

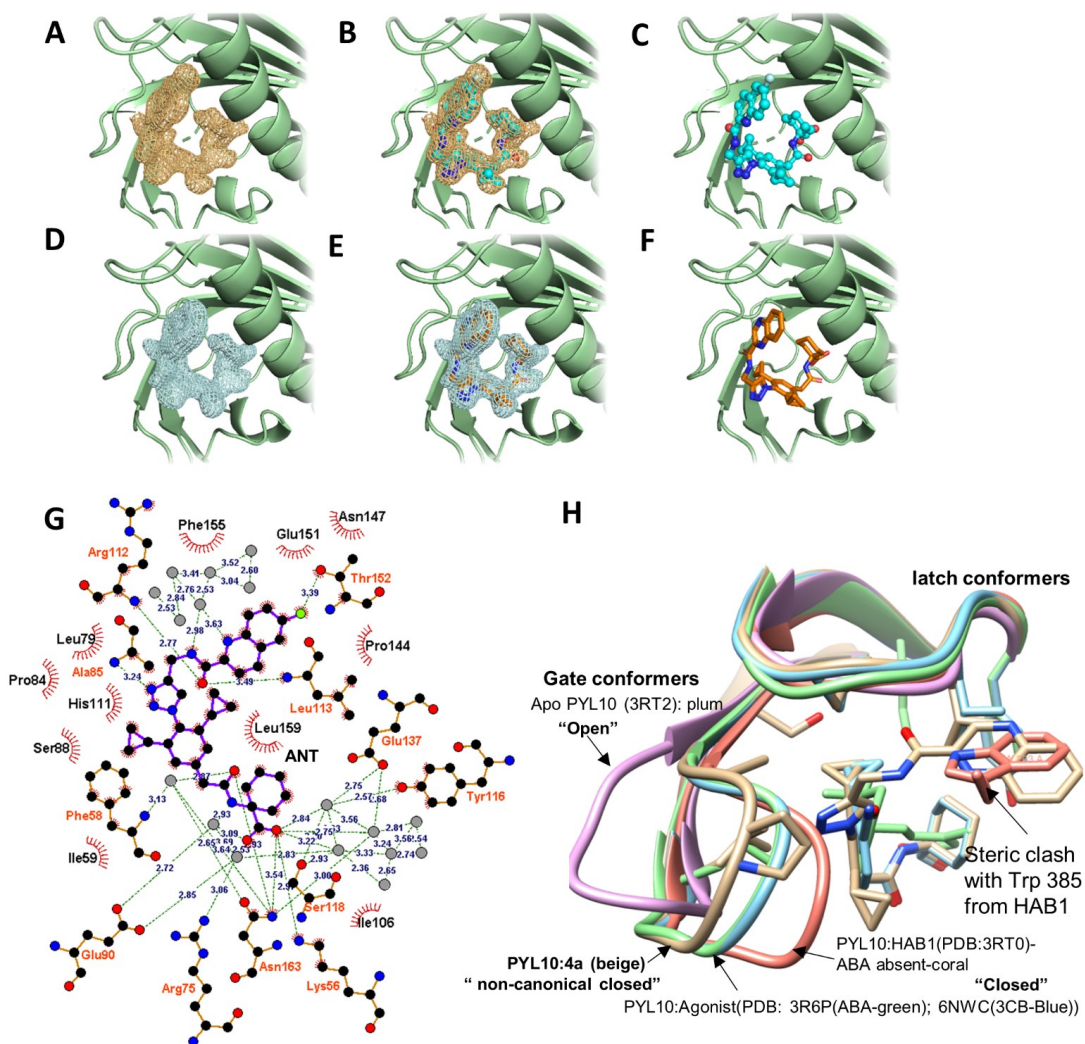

**Fig. S8.** Unbiased electron density in the PYL10 binding pocket. Omit maps contoured at 2 sigma show clear ligand density present in PYL10's ligand-binding pocket after several rounds of refining the **(A)** PYL10<sup>24-183</sup>:ANT and **(D)** PYL10<sup>24-183</sup>:4a structural models in the absence of ligand. The envelope of unbiased electron density allowed the unambiguous placement of **(B)** ANT and **(E)** 4a in the PYL10<sup>24-183</sup> binding pocket. Correct ligand placement is supported by real-space correlation coefficients of 0.97 and 0.97 calculated between the unbiased density and the modeled ligand for ANT and 4a, respectively. Placement of **(C)** ANT and **(F)** 4a in the PYL10<sup>24-183</sup> binding pocket. **(G)** Ligplot (48) of ANT interactions with PYL10 in the binary complex. Grey circles represent water molecules, values indicate H-bond distances **(H)** Conformations of the gate & latch loops in PYL10 in complex in presence/absence of different ligands i.e. ABA (green), 3CB (blue) (21) with HAB1 (coral)-closed conformation (49), ANT/4a (beige)-semi-open conformation and Apo PYL10 (plum)-open conformation. ANT's (quinoline ring)/4a (quinoxaline ring) is placed to block interaction with conserved Trp from PP2Cs by creating a steric clash. RMSD between open conformer/apo-PYL10 (PDB:3RT2) and ABA bound closed conformer (PDB:3R6P), between open conformer/apo-PYL10 (PDB:3RT2) and ANT bound non-canonical closed conformer and between ABA bound closed conformer (PDB:3R6P) and ANT bound non-canonical closed conformer are 1.4 Å, 1.2 Å and 0.6 Å respectively.

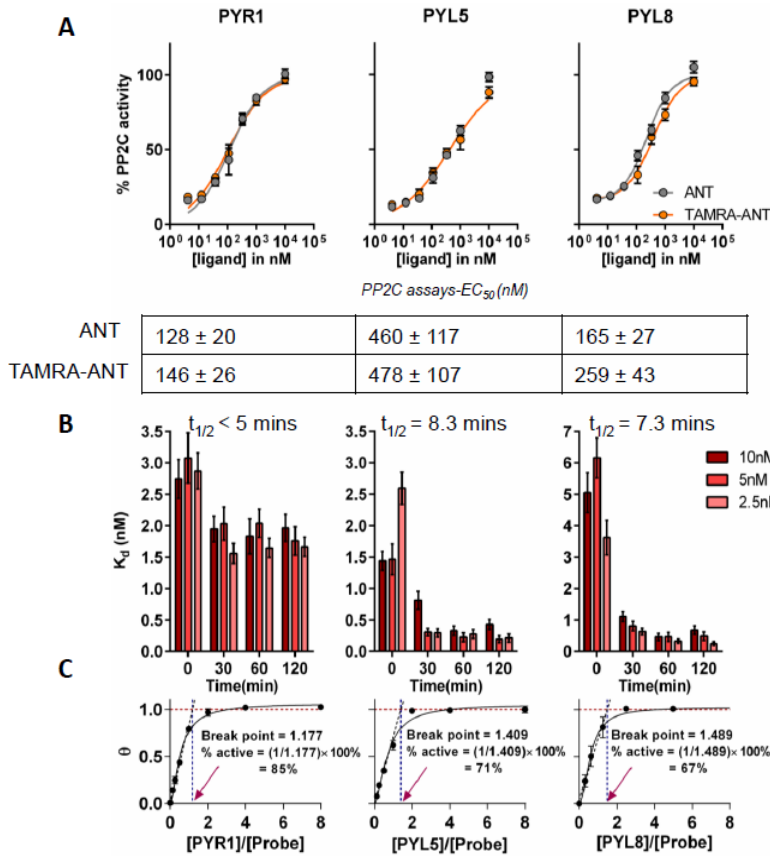

**Fig. S9. TAMRA-ANT binds to ABA receptors with high affinity. (A)** TAMRA-ANT and ANT are equipotent in antagonizing ABA receptors. Graphs show chemical dependent recovery of Arabidopsis HAB1 (25 nM) for the receptors shown (25 nM), at 5000 nM ABA. The  $EC_{50}$  values in the table below and were estimated by non-linear fits to the dose response data in the drc R package; SDs reported by drc are shown ( $n = 3$ ). **(B)**

Time-dependent binding of TAMRA-ANT to ABA receptors. TAMRA-ANT (10, 5 and 2.5 nM) was incubated with different concentrations of ABA receptors (shown) and incubated for different times in the FP assay buffer at 25 °C. FP data were fit to the quadratic Morrison equation of ligand binding and dissociation constant ( $k_d$  shown in nM) plotted versus time for different probe concentrations. Inset values indicate half-lives of binding of probe to ABA receptors, as deduced by fitting  $k_d$  vs time for reactions with 5 nM TAMRA-ANT to a one-phase exponential decay in Graph Pad Prism; ( $n = 4$ , s.e.m shown). **(C)** Inference of the percent active receptors in receptor samples. Active receptor concentration was determined by extrapolation of the x-intercept to determine the receptor:probe ratio at which 100% occupancy occurs (as estimated by breakpoint method (43)). If a given receptor sample contained fully active receptors, 100% occupancy would occur at 1:1 ratio; deviations from this ratio are used to correct for the presence of inactive sub-populations of receptors in test samples. 50 nM of probe incubated with different amounts of ABA receptors in FP assay buffer at 25 °C for 90 mins. Fraction bound ( $\theta$ ) plotted against the ratio of receptor/probe ( $n = 12$ ). Error bars represent SD. The reciprocal of the breakpoint shown indicates the fraction of active protein.

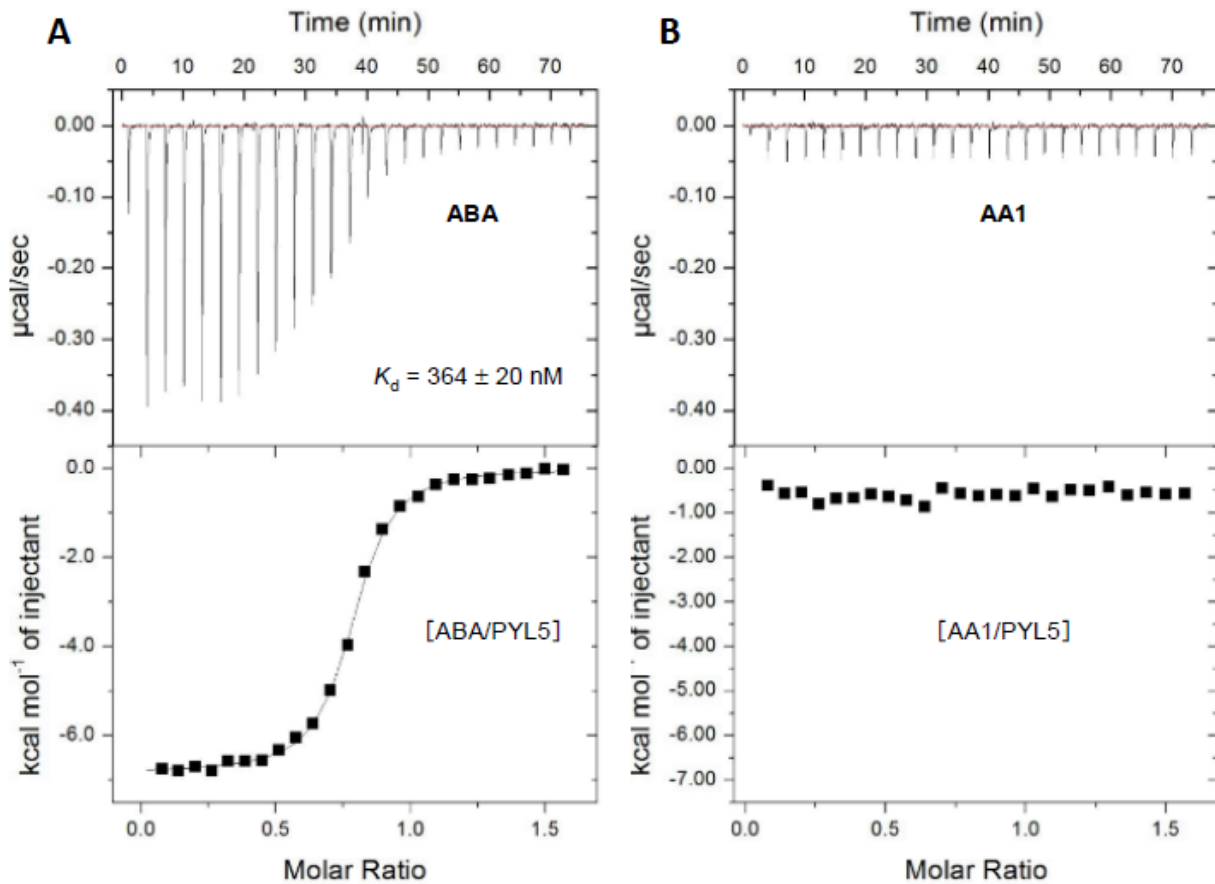

**Fig. S10. Isothermal titration calorimetry profiles and thermodynamic data for ABA/AA1-PYL5 binding experiments (A and B).** (Top two panels) Raw data for 25 sequential injections of 1.25  $\mu\text{L}$  of 0.5 mM ABA (left top) or AA1 (right top) stock solution into cells containing 50  $\mu\text{M}$  6 $\times$ His-tagged PYL5 in 0.1 M phosphate buffer, pH 8.0. Injections were performed over a period of 5 sec. with 3 min intervals between injections. (Bottom two panels) Plot of heat evolved (kcal) per mole of ABA (left bottom) or AA1 (right bottom) dilution, against the molar ratio of ABA or AA1 to PYL5. Data were fitted using the software's 'one set of sites' and the solid line represents the best fit.

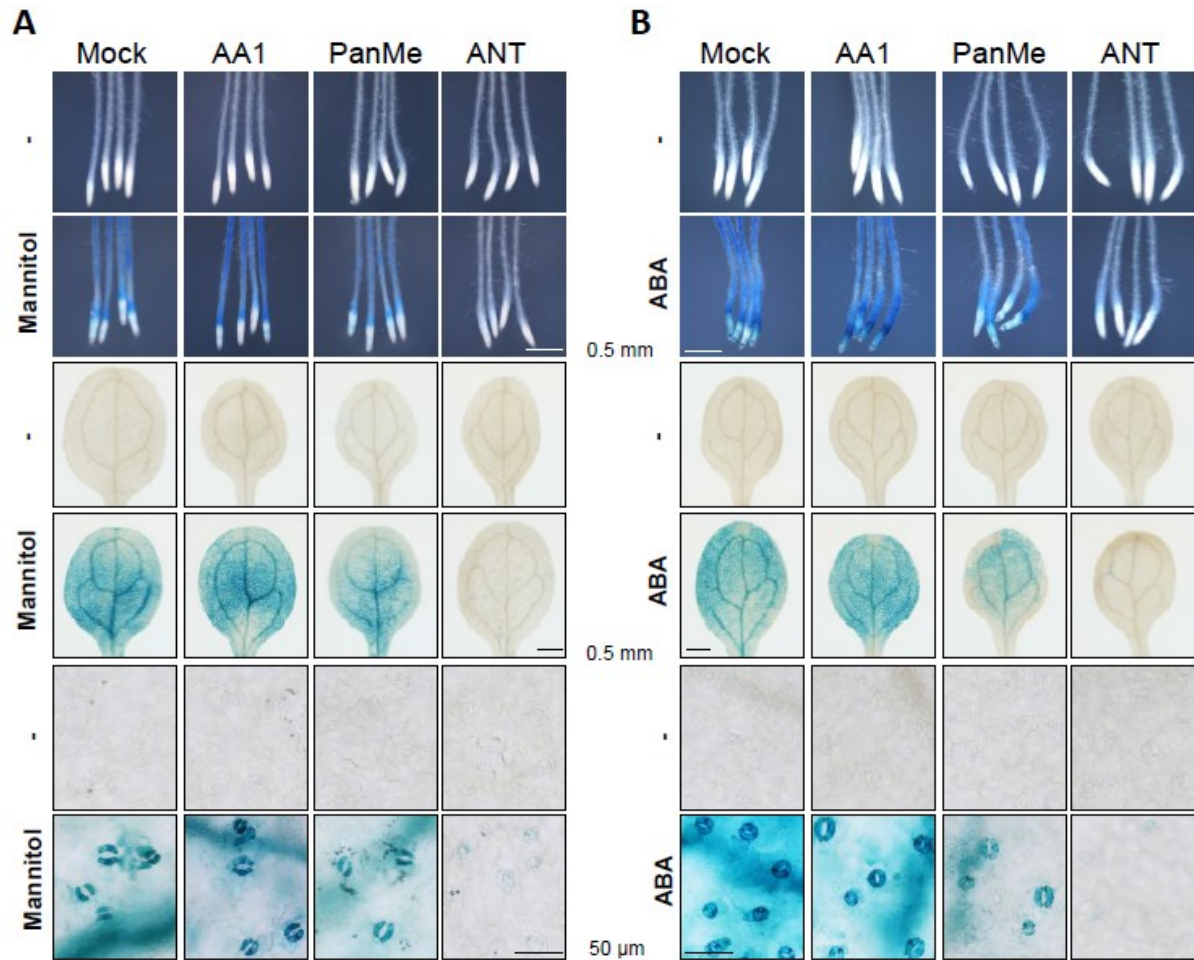

**Fig. S11. Spatial expression pattern of *MAPKKK18* after treatment with osmotic stress or exogenous ABA in presence of different antagonists. (A)** Five-day-old seedlings of *MAPKKK18p::GUS* transgenic *Arabidopsis* were incubated in 400 mM mannitol solution containing ABA antagonists (2.5 μM) for 6 h at 22°C in light conditions. Scale bars = 0.5 mm (root and leaf) and 50 μm (epidermis). **(B)** Five-day-old seedlings of promoter-*MAPKKK18::GUS* transgenic *Arabidopsis* were incubated in a chemical solution (each 2.5 μM & equimolar concentration of ABA) for 6 h at 22°C in light conditions. Scale bars = 0.5 mm (root and leaf) and 50 μm (epidermis). The leaf data shown in the middle panels are identical to that shown in Fig. 5C.

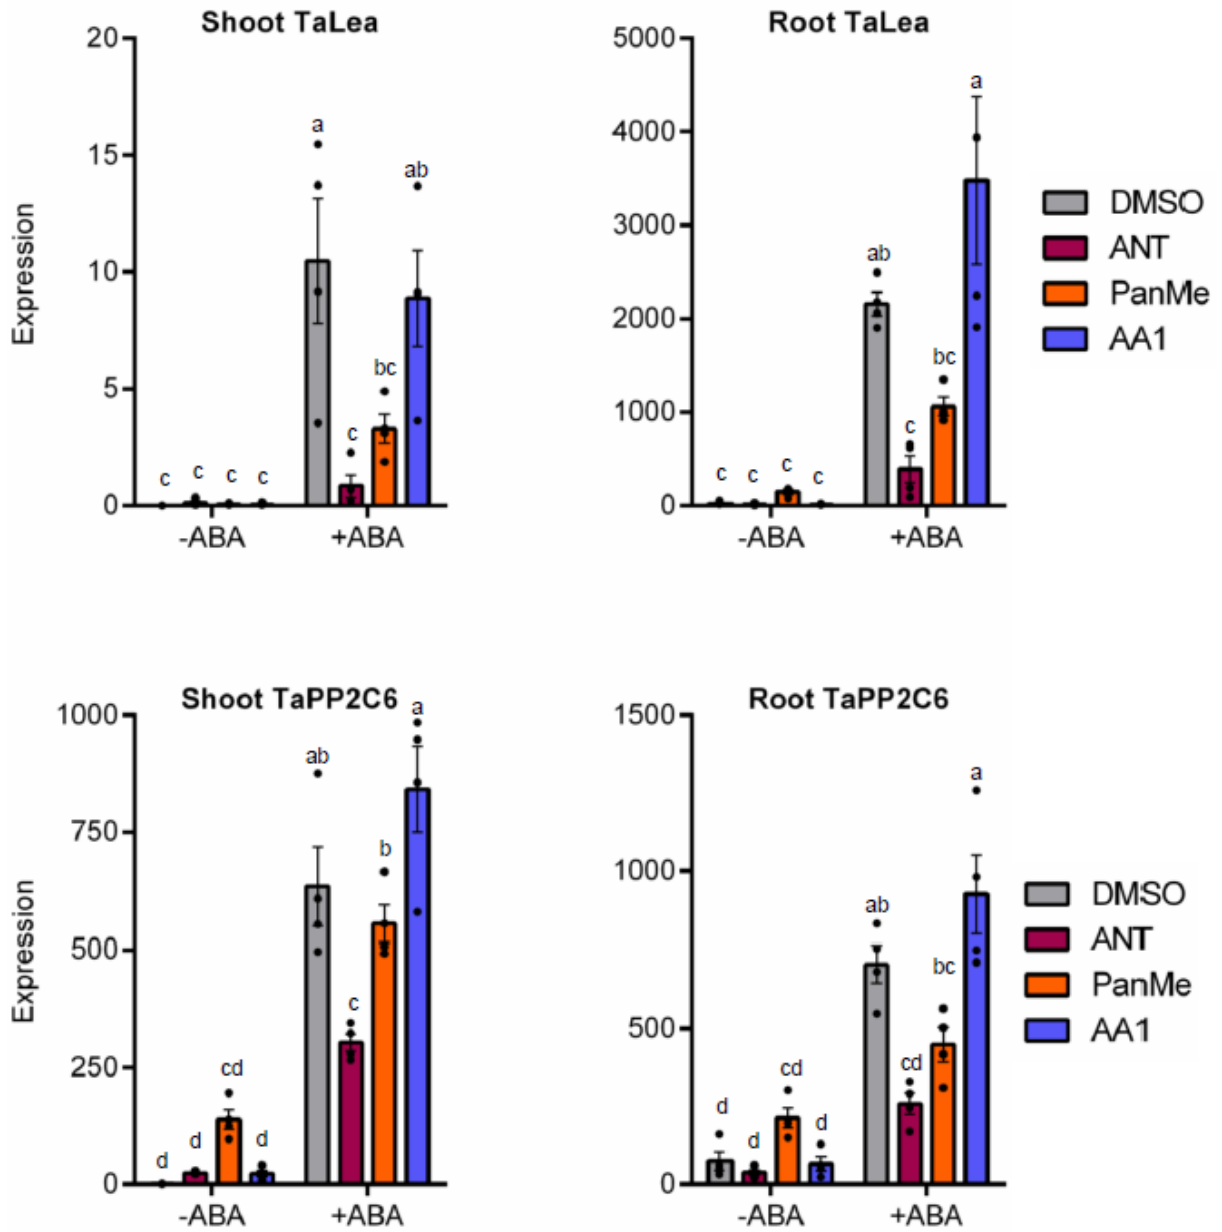

**Fig. S12. ANT reduces ABA mediated transcriptional responses in wheat.** Comparison of transcript levels for *TaLea* (A) and *TaPP2C6* (B) after treatment with individual antagonists (5  $\mu$ M) or in co-application with ABA (5  $\mu$ M) in 7-day-old wheat seedlings (samples prepared 12 hours post-application). Letters indicate different significance levels as determined by using the Tukey's hsd test (n = 4 biological replicates); error bars show s. e. m. Black circles indicate individual data points.



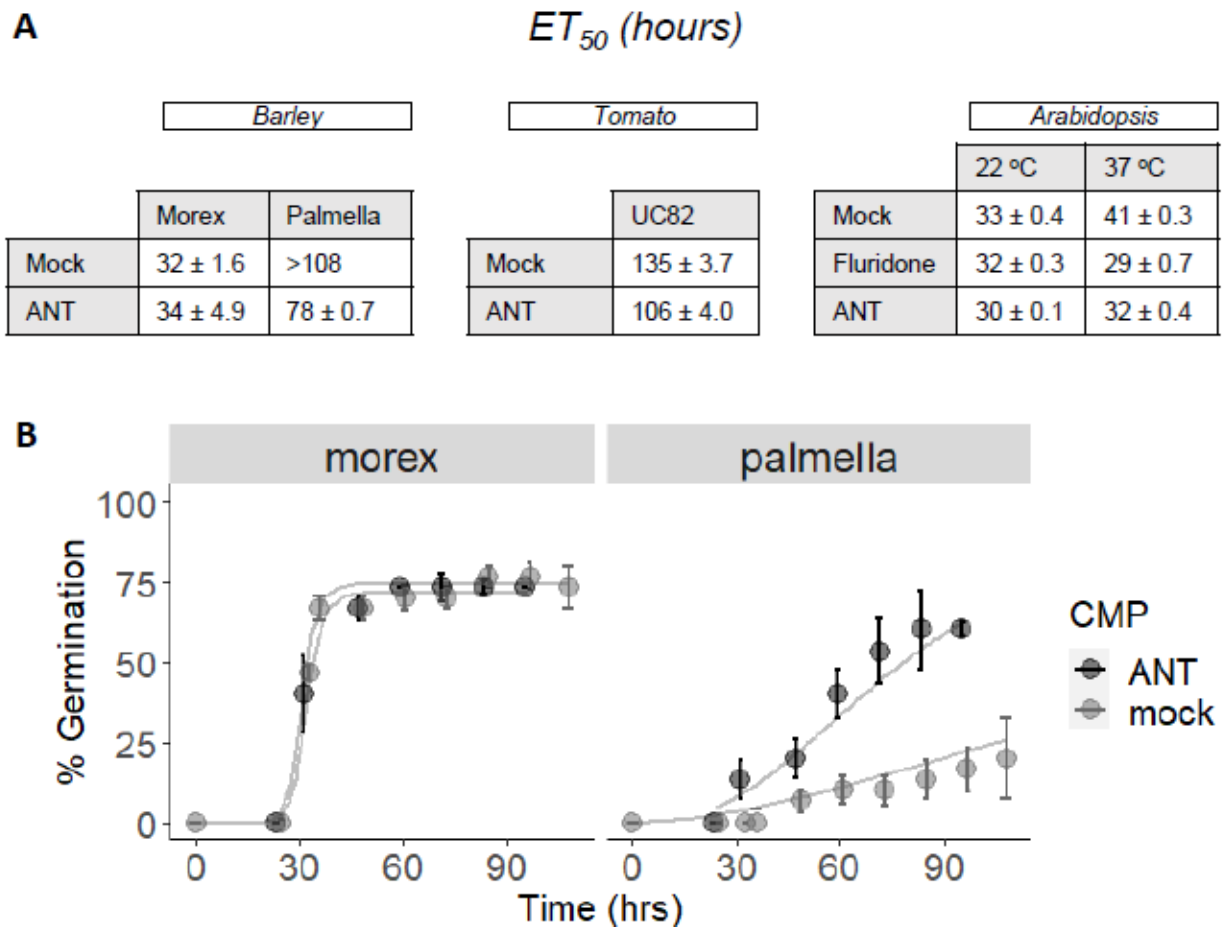

**Fig. S13. ANT accelerates germination in multiple species.** (A) Seed germination was monitored over time for seeds plated on  $\frac{1}{2}$  MS, 0.7% agar plates containing DMSO (mock-treated) or 100  $\mu$ M ANT (barley), 25  $\mu$ M ANT (tomato), and 30  $\mu$ M ANT (Arabidopsis). Time-response data were fit to a log-logistic model using the drc package to infer  $ET_{50}$  values (time required to reach 50% germination). Time response data used for inferring the  $ET_{50}$  values shown are shown in Fig 5E & F. (B) Effects of ANT on barley are landrace dependent. Palmella data shown here is identical to that shown in Fig. 5E.

**Supplementary Table 1.** Data collection and refinement statistics

|                                      | PYL10 (25-183): <b>4a</b> | PYL10 (25-183): <b>4o/ANT</b> |
|--------------------------------------|---------------------------|-------------------------------|
| Data collection                      |                           |                               |
| Space group                          | C 1 2 1                   | C 1 2 1                       |
| Cell dimensions                      |                           |                               |
| a, b, c (Å)                          | 59.55, 64.39, 44.60       | 59.75, 64.39, 44.57           |
| $\alpha$ , $\beta$ , $\gamma$ (°)    | 90, 108.8, 90             | 90, 109.1, 90                 |
| Resolution (Å)                       | 50-1.77 (1.83-1.77)       | 50-1.80 (1.86-1.80)           |
| Total Reflections                    | 105,525 (7,916)           | 104,858 (6,927)               |
| Unique Reflections                   | 15,495 (1,467)            | 14,845 (1,429)                |
| $R_{\text{merge}}$                   | 0.046 (0.383)             | 0.051 (0.373)                 |
| $R_{\text{meas}}$                    | 0.049 (0.423)             | 0.055 (0.416)                 |
| $R_{\text{pim}}$                     | 0.019 (0.175)             | 0.020 (0.181)                 |
| CC1/2                                | 0.999 (0.916)             | 1.000 (0.912)                 |
| CC*                                  | 1.000 (0.978)             | 1.000 (0.977)                 |
| $I / \sigma I$                       | 22.7 (2.8)                | 25.3 (2.6)                    |
| Completeness (%)                     | 97.0 (84.8)               | 97.0 (86.8)                   |
| Redundancy                           | 6.8 (5.4)                 | 7.1 (4.8)                     |
| Refinement                           |                           |                               |
| Resolution (Å)                       | 42.43-1.77 (1.83-1.77)    | 42.46-1.80 (1.86-1.80)        |
| No. reflections                      | 15,099 (1,310)            | 14,462 (1,290)                |
| $R_{\text{cryst}} / R_{\text{free}}$ | 0.159/0.204               | 0.161/0.206                   |
| No. atoms                            | 1443                      | 1462                          |
| Protein                              | 1224                      | 1202                          |
| Ligand/ion                           | 50                        | 58                            |
| Water                                | 169                       | 202                           |
| B-factors                            |                           |                               |
| Protein                              | 31.0                      | 20.2                          |
| Ligand/ion                           | 32.6                      | 23.1                          |
| Water                                | 40.3                      | 28.0                          |
| R.m.s. deviations                    |                           |                               |
| Bond lengths (Å)                     | 0.005                     | 0.006                         |
| Bond angles (°)                      | 0.750                     | 0.820                         |
| Ramachandran Stats                   |                           |                               |
| Favored                              | 98.0%                     | 98.0%                         |
| Allowed                              | 2.0%                      | 2.0%                          |

**Analytical data.**

**Methyl (4-amino-3,5-dibromophenyl)acetate (1a)**

<sup>1</sup>H-NMR (700 MHz; DMSO-d<sub>6</sub>): δ 7.35 (s, 2H), 5.27 (s, 2H), 3.61 (s, 3H), 3.56 (s, 2H), 2.51 (t, *J* = 1.8 Hz, 3H). <sup>13</sup>C NMR (176 MHz; DMSO): δ 172.1, 142.1, 133.2, 125.1, 107.8, 52.2, 38.3.

**Methyl (4-amino-3,5-dicyclopropylphenyl)acetate (1b)**

<sup>1</sup>H-NMR (700 MHz; DMSO-d<sub>6</sub>): δ 6.62 (s, 2H), 4.76 (s, 2H), 3.57 (s, 3H), 3.41 (s, 2H), 1.68-1.66 (m, 2H), 0.88-0.85 (m, 4H), 0.47-0.44 (m, 4H). <sup>13</sup>C NMR (176 MHz; DMSO): δ 172.8, 145.8, 126.1, 125.4, 121.3, 115.0, 51.9, 11.8, 6.0.

**(4-Amino-3,5-dicyclopropylphenyl)acetic acid (1c)**

<sup>1</sup>H-NMR (700 MHz; DMSO-d<sub>6</sub>): δ 6.62 (s, 2H), 3.30 (s, 3H), 1.67 (tt, *J* = 8.3, 5.4 Hz, 2H), 0.88-0.85 (m, 4H), 0.46-0.44 (m, 4H). <sup>13</sup>C NMR (176 MHz; DMSO): δ 173.9, 145.6, 126.2, 125.3, 122.0, 11.8, 6.0.

**(4-Azido-3,5-dicyclopropylphenyl)acetic acid (1d)**

<sup>1</sup>H-NMR (700 MHz; DMSO-d<sub>6</sub>): δ 6.75 (s, 2H), 3.46 (s, 2H), 2.12-2.09 (m, 2H), 0.99-0.96 (m, 4H), 0.68-0.66 (m, 4H). <sup>13</sup>C NMR (176 MHz; DMSO): δ 173.0, 136.8, 136.6, 133.2, 125.4, 12.1, 8.4.

**Methyl 1-[(4-azido-3,5-dicyclopropylphenyl)methyl]carbonylamino}cyclohexanecarboxylate (2a)**

<sup>1</sup>H-NMR (700 MHz; DMSO-d<sub>6</sub>): δ 8.15 (s, 1H), 6.76 (s, 2H), 3.52 (s, 3H), 3.36 (s, 2H), 2.11 (tt, *J* = 8.4, 5.3 Hz, 2H), 1.90 (d, *J* = 13.4 Hz, 2H), 1.63 (td, *J* = 12.6, 3.3 Hz, 2H), 1.50 (ddt, *J* = 21.8, 13.5, 4.3 Hz, 3H), 1.44-1.39 (m, 2H), 1.25-1.18 (m, 1H), 1.00-0.97 (m, 4H), 0.67-0.65 (m, 4H). <sup>13</sup>C NMR (176 MHz; DMSO): δ 174.8, 170.2, 136.54, 136.50, 134.7, 124.7, 58.4, 52.1, 42.0, 32.2, 25.3, 21.4, 12.0, 8.4.

**1-[(4-Azido-3,5-dicyclopropylphenyl)methyl]carbonylamino}cyclohexanecarboxylic acid.(2b)**

<sup>1</sup>H-NMR (700 MHz; DMSO-d<sub>6</sub>): δ 8.00 (s, 1H), 6.77 (s, 2H), 2.10 (tt, *J* = 8.8, 4.7 Hz, 2H), 1.94 (d, *J* = 13.3 Hz, 2H), 1.61 (td, *J* = 12.7, 2.8 Hz, 2H), 1.53-1.47 (m, 3H), 1.40 (q, *J* = 12.4 Hz, 2H), 1.21 (dt, *J* = 18.9, 8.9 Hz, 1H), 0.99-0.96 (m, 4H), 0.66 (q, *J* = 5.2 Hz, 4H). <sup>13</sup>C NMR (176 MHz; DMSO): δ 176.0, 170.0, 136.52, 136.42, 134.9, 124.7, 58.2, 42.2, 32.1, 25.4, 21.5, 12.0, 8.4.

**N-2-Propynyl-2-quinoxalinecarboxamide (3a)** <sup>1</sup>H-NMR (700 MHz; DMSO-d<sub>6</sub>): δ 9.48-9.45 (m, 2H), 8.22-8.20 (m, 2H), 8.01 (ddt, *J* = 5.9, 4.0, 1.9 Hz, 2H), 4.15 (dd, *J* = 5.9, 2.5 Hz, 2H), 3.15 (t, *J* = 2.5 Hz, 1H). <sup>13</sup>C NMR (176 MHz; DMSO): δ 163.5, 144.5, 144.1, 143.5, 140.3, 132.5, 131.8, 129.9, 129.6, 81.4, 73.4, 28.9.

**N-2-Propynyl-4-bromo-2-furamide (3b)** <sup>1</sup>H-NMR (700 MHz; DMSO-d<sub>6</sub>): δ 8.70 (t, *J* = 5.4 Hz, 1H), 8.27 (s, 1H), 6.94 (s, 1H), 4.01 (dd, *J* = 5.6, 2.5 Hz, 2H), 3.15 (t, *J* = 2.5 Hz, 1H). <sup>13</sup>C NMR (176 MHz; DMSO): δ 160.5, 147.8, 125.1, 123.3, 111.0, 81.4, 73.6, 28.4.

**N-2-Propynyl-6-methyl-2-pyridinecarboxamide (3c)** <sup>1</sup>H-NMR (700 MHz; DMSO-d<sub>6</sub>): δ 8.96 (t, *J* = 5.7 Hz, 1H), 7.86 (dt, *J* = 20.0, 9.2 Hz, 2H), 7.47 (d, *J* = 7.6 Hz, 1H), 4.08 (dd, *J* = 6.1, 2.3 Hz, 2H), 3.10-3.09 (m, 1H), 2.56 (s, 3H). <sup>13</sup>C NMR (176 MHz; DMSO): δ 164.2, 157.7, 149.4, 138.3, 126.6, 119.5, 81.7, 73.1, 28.7, 24.3.

**N-2-Propynyl-2-quinolinecarboxamide (3d)** <sup>1</sup>H-NMR (700 MHz; DMSO-d<sub>6</sub>): δ 9.29 (t, *J* = 5.9 Hz, 1H), 8.58 (d, *J* = 8.5 Hz, 1H), 8.16 (dd, *J* = 11.0, 8.6 Hz, 2H), 8.09 (d, *J* = 8.2 Hz, 1H), 7.89 (dd, *J* = 8.2, 7.1 Hz, 1H), 7.73 (t, *J* = 7.5 Hz, 1H), 4.15 (dd, *J* = 6.0, 2.5 Hz, 2H), 3.14 (t, *J* = 2.4 Hz, 1H). <sup>13</sup>C NMR (176 MHz; DMSO): δ 164.4, 150.2, 146.5, 138.4, 131.0, 129.6, 129.3, 128.64, 128.57, 119.1, 81.7, 73.2, 28.9.

**N-2-Propynyl-2-naphthamide (3e)** <sup>1</sup>H-NMR (700 MHz; DMSO-d<sub>6</sub>): δ 9.10 (t, *J* = 5.4 Hz, 1H), 8.48 (s, 1H), 8.04-7.94 (m, 4H), 7.64-7.59 (m, 2H), 4.13 (dd, *J* = 5.5, 2.5 Hz, 2H), 3.15 (t, *J* = 2.5 Hz, 1H). <sup>13</sup>C NMR (176 MHz; DMSO): δ 166.4, 134.7, 132.6, 131.6, 129.3, 128.4, 128.16, 128.14, 128.07, 127.2, 124.5, 81.8, 73.4, 29.1.

**N-2-Propynyl-2,2-difluoro-2H-1,3-benzodioxole-4-carboxamide (3f)** <sup>1</sup>H-NMR (700 MHz; DMSO-d<sub>6</sub>): δ 8.87 (t, *J* = 5.3 Hz, 1H), 7.57 (dd, *J* = 8.0, 1.0 Hz, 1H), 7.51 (dd, *J* = 8.1, 0.9 Hz, 1H), 7.30 (t, *J* = 8.1 Hz, 1H), 4.07 (dd, *J* = 5.6, 2.5 Hz, 2H), 3.16 (t, *J* = 2.5 Hz, 1H). <sup>13</sup>C NMR (176 MHz; DMSO): δ 162.2, 143.7, 141.1, 133.1, 131.6, 130.2, 124.8, 123.9, 118.7, 113.1, 81.2, 73.6, 29.0.

**N-2-Propynyl-5-bromo-2-furamide (3g)** <sup>1</sup>H-NMR (700 MHz; DMSO-d<sub>6</sub>): δ 8.88 (t, *J* = 5.6 Hz, 1H), 7.18 (d, *J* = 3.6 Hz, 1H), 6.76 (d, *J* = 3.6 Hz, 1H), 3.99 (dd, *J* = 5.8, 2.5 Hz, 2H), 3.12 (t, *J* = 2.5 Hz, 1H). <sup>13</sup>C NMR (176 MHz; DMSO): δ 156.8, 149.7, 125.2, 116.7, 114.5, 81.4, 73.4, 28.3.

**N-2-Propynyl-5-bromo-3-thenamide (3h)** <sup>1</sup>H-NMR (700 MHz; DMSO-d<sub>6</sub>): δ 8.80 (t, *J* = 4.7 Hz, 1H), 8.15 (s, 1H), 7.59 (s, 1H), 4.02 (dd, *J* = 5.4, 2.2 Hz, 2H), 3.13 (s, 1H). <sup>13</sup>C NMR (176 MHz; DMSO): δ 160.9, 137.8, 131.9, 129.8, 112.5, 81.5, 73.5, 39.88, 39.76, 39.65, 28.7.

**N-2-Propynyl-5-chloro-2-thenamide (3i)** <sup>1</sup>H-NMR (700 MHz; DMSO-d<sub>6</sub>): δ 9.05 (t, *J* = 5.4 Hz, 1H), 7.66 (d, *J* = 4.1 Hz, 1H), 7.20 (d, *J* = 4.1 Hz, 1H), 4.03 (dd, *J* = 5.6, 2.5 Hz, 2H), 3.17 (t, *J* = 2.5 Hz, 1H). <sup>13</sup>C NMR (176 MHz; DMSO): δ 160.3, 138.8, 133.7, 128.83, 128.64, 81.2, 73.8, 28.8.

**N-2-Propynyl-3-chloro-2-thenamide (3j)** <sup>1</sup>H-NMR (700 MHz; DMSO-d<sub>6</sub>): δ 8.51 (t, *J* = 5.1 Hz, 1H), 7.86 (d, *J* = 5.3 Hz, 1H), 7.16 (d, *J* = 5.3 Hz, 1H), 4.03 (dd, *J* = 5.7, 2.5 Hz, 2H), 3.14 (t, *J* = 2.5 Hz, 1H). <sup>13</sup>C NMR (176 MHz; DMSO): δ 160.1, 131.5, 130.3, 129.7, 124.6, 81.3, 73.5, 29.2.

**N-2-Propynyl-5-methyl-2-furamide (3k)** <sup>1</sup>H-NMR (700 MHz; DMSO-d<sub>6</sub>): δ 8.62 (t, *J* = 5.5 Hz, 1H), 7.03 (d, *J* = 3.4 Hz, 1H), 6.25-6.24 (m, 1H), 3.98 (dd, *J* = 5.8, 2.5 Hz, 2H), 3.09 (t, *J* = 2.5 Hz, 1H), 2.33 (s, 3H). <sup>13</sup>C NMR (176 MHz; DMSO): δ 157.9, 155.0, 146.4, 115.3, 108.6, 81.7, 73.1, 28.2, 13.9.

**N-2-Propynyl-2-bromo-1,3-thiazole-5-carboxamide (3l)** <sup>1</sup>H-NMR (700 MHz; DMSO-d<sub>6</sub>): δ 9.25 (t, *J* = 5.3 Hz, 1H), 8.24 (d, *J* = 7.4 Hz, 1H), 4.05 (dd, *J* = 5.5, 2.5 Hz, 2H), 3.20 (t, *J* = 2.5 Hz, 1H). <sup>13</sup>C NMR (176 MHz; DMSO): δ 158.9, 143.8, 140.4, 139.4, 80.8, 74.1, 28.9.

**N-2-Propynyl-6-bromo-2-pyridinecarboxamide (3m)** <sup>1</sup>H-NMR (700 MHz; DMSO-d<sub>6</sub>): δ 9.06 (t, *J* = 5.9 Hz, 1H), 8.05 (dd, *J* = 7.6, 0.9 Hz, 1H), 7.95 (t, *J* = 7.7 Hz, 1H), 7.87 (dd,

$J = 8.0, 0.9$  Hz, 1H), 4.06 (dd,  $J = 5.9, 2.5$  Hz, 2H), 3.10 (t,  $J = 2.5$  Hz, 1H).  $^{13}\text{C}$  NMR (176 MHz; DMSO):  $\delta$  162.9, 151.4, 141.5, 140.7, 131.6, 122.1, 81.5, 73.1, 29.0.

**N-2-Propynyl-6-fluoro-2-quinolinecarboxamide (3n)**  $^1\text{H}$ -NMR (700 MHz; DMSO- $d_6$ ):  $\delta$  9.29 (t,  $J = 5.9$  Hz, 1H), 8.57 (d,  $J = 8.5$  Hz, 1H), 8.21-8.18 (m, 2H), 7.92 (dd,  $J = 9.3, 2.9$  Hz, 1H), 7.81 (td,  $J = 8.9, 2.9$  Hz, 1H), 4.15 (dd,  $J = 6.0, 2.3$  Hz, 2H), 3.13 (t,  $J = 2.4$  Hz, 1H).  $^{13}\text{C}$  NMR (176 MHz; DMSO):  $\delta$  164.2, 161.7, 160.3, 149.90, 149.89, 143.7, 138.00, 137.97, 132.63, 130.26, 130.20, 121.41, 121.26, 119.9, 111.76, 111.63, 81.6, 73.3, 28.9.

**N-2-Propynyl-8-fluoro-2-quinolinecarboxamide (3o)**  $^1\text{H}$ -NMR (700 MHz; DMSO- $d_6$ ):  $\delta$  9.17 (t,  $J = 5.9$  Hz, 1H), 8.66 (d,  $J = 8.5$  Hz, 1H), 8.24 (d,  $J = 8.5$  Hz, 1H), 7.94-7.93 (m, 1H), 7.73-7.72 (m, 2H), 4.16 (dd,  $J = 6.0, 2.4$  Hz, 2H), 3.14 (t,  $J = 2.5$  Hz, 1H).  $^{13}\text{C}$  NMR (176 MHz; DMSO):  $\delta$  160.07, 158.43, 150.49, 138.53, 138.52, 136.62, 136.55, 130.94, 128.87, 128.82, 128.32, 124.58, 124.56, 120.27, 115.17, 115.07, 81.63, 73.26, 29.07.

**N-2-Propynyl-7-bromo-2-naphthamide (3p)**  $^1\text{H}$ -NMR (700 MHz; DMSO- $d_6$ ):  $\delta$  9.28 (t,  $J = 5.9$  Hz, 1H), 8.61 (d,  $J = 8.4$  Hz, 1H), 8.30 (d,  $J = 1.8$  Hz, 1H), 8.18 (d,  $J = 8.5$  Hz, 1H), 8.07 (d,  $J = 8.7$  Hz, 1H), 7.87 (dd,  $J = 8.7, 2.0$  Hz, 1H), 4.16 (dd,  $J = 6.0, 2.5$  Hz, 2H), 3.15 (t,  $J = 2.5$  Hz, 1H).  $^{13}\text{C}$  NMR (176 MHz; DMSO):  $\delta$  164.0, 151.2, 147.0, 138.7, 131.7, 131.4, 130.6, 128.1, 124.2, 119.7, 81.5, 73.4, 29.0.

**1-[[[3,5-Dicyclopropyl-4-{4-[(2-quinoxalinylicarbonylamino)methyl]-1H-1,2,3-triazol-1-yl]}phenyl)methyl]carbonylamino}cyclohexanecarboxylic acid (4a)**

$^1\text{H}$ -NMR (700 MHz; DMSO- $d_6$ ):  $\delta$  9.55 (t,  $J = 6.0$  Hz, 1H), 9.50 (s, 1H), 8.30 (s, 1H), 8.21 (dt,  $J = 7.7, 1.9$  Hz, 2H), 8.08 (s, 1H), 8.00 (dq,  $J = 6.8, 3.4$  Hz, 2H), 6.80 (s, 2H), 4.77 (d,  $J = 6.0$  Hz, 2H), 3.47 (s, 2H), 1.96 (d,  $J = 13.3$  Hz, 2H), 1.63 (m, 2H), 1.54-1.48 (m, 3H), 1.44-1.16 (m, 5H), 0.74 (dd,  $J = 8.4, 1.9$  Hz, 4H), 0.59-0.58 (m, 4H).  $^{13}\text{C}$  NMR (176 MHz; DMSO):  $\delta$  176.0, 169.8, 163.7, 144.86, 144.81, 144.2, 143.4, 140.37, 140.25, 139.5, 135.4, 132.4, 131.8, 129.9, 129.6, 126.5, 122.8, 58.3, 42.5, 40.9, 40.5, 35.3, 32.1, 25.4, 21.5, 11.1. HRMS  $[\text{M}+\text{H}]^+$  calculated 594.2828, observed 594.2980

**1-[[[4-{4-[(4-Bromo-2-furylamino)methyl]-1H-1,2,3-triazol-1-yl]}-3,5-dicyclopropylphenyl)methyl]carbonylamino}cyclohexanecarboxylic acid (4b)**

$^1\text{H}$ -NMR (700 MHz; DMSO- $d_6$ ):  $\delta$  8.82 (t,  $J = 5.7$  Hz, 1H), 8.28 (d,  $J = 0.9$  Hz, 1H), 8.23 (s, 1H), 8.09 (s, 1H), 6.97 (d,  $J = 0.9$  Hz, 1H), 6.80 (s, 2H), 4.58 (d,  $J = 5.7$  Hz, 2H), 3.47 (s, 2H), 1.97 (d,  $J = 13.3$  Hz, 2H), 1.64 (m, 2H), 1.55-1.40 (m, 5H), 1.25-1.17 (m, 1H), 1.25-1.15 (m, 3H), 0.73 (dd,  $J = 8.4, 1.7$  Hz, 4H), 0.60-0.59 (m, 4H).  $^{13}\text{C}$  NMR (176 MHz, DMSO- $d_6$ )  $\delta$  ppm 11.06, 21.52, 25.43, 32.09, 34.67, 40.92, 42.49, 58.30, 111.19, 122.91, 123.16, 125.46, 126.39, 135.44, 139.54, 140.37, 145.01, 147.71, 160.82, 169.79, 175.99. HRMS  $[\text{M}+\text{H}]^+$  calculated 612.1644, observed 612.1663.

**1-[[[3,5-Dicyclopropyl-4-{4-[(6-methyl-2-pyridylcarbonylamino)methyl]-1H-1,2,3-triazol-1-yl]}phenyl)methyl]carbonylamino}cyclohexanecarboxylic acid (4c)**

$^1\text{H}$ -NMR (700 MHz; DMSO- $d_6$ ):  $\delta$  12.12 (s, 1H), 9.07 (t,  $J = 5.9$  Hz, 1H), 8.25 (s, 1H), 8.09 (s, 1H), 7.88 (q,  $J = 7.6$  Hz, 2H), 7.47 (d,  $J = 6.9$  Hz, 1H), 6.80 (s, 2H), 4.69 (d,  $J = 6.0$  Hz, 2H), 3.47 (s, 2H), 1.97 (d,  $J = 13.3$  Hz, 2H), 1.64 (t,  $J = 12.8$  Hz, 2H), 1.55-1.41 (m, 6H), 1.23-1.15 (m, 3H), 0.73 (d,  $J = 8.5$  Hz, 4H), 0.59 (d,  $J = 3.2$  Hz, 4H).  $^{13}\text{C}$  NMR (176 MHz; DMSO):  $\delta$  176.0, 169.8, 164.4, 157.6, 149.6, 145.0, 140.4, 139.5, 138.3,

136.5, 135.4, 126.6, 126.3, 124.7, 122.9, 119.5, 58.3, 42.5, 35.0, 32.1, 25.4, 24.3, 21.5, 11.1, 8.4. HRMS [M+H]<sup>+</sup> calculated 557.2876, observed 557.2985.

**1-[[[3,5-Dicyclopropyl-4-{4-[(2-quinolylcarbonylamino)methyl]-1*H*-1,2,3-triazol-1-yl]phenyl)methyl]carbonylamino}cyclohexanecarboxylic acid (4d)**

<sup>1</sup>H-NMR (700 MHz; DMSO-*d*<sub>6</sub>): δ 9.41 (t, *J* = 0.7 Hz, 1H), 8.59 (t, *J* = 0.6 Hz, 1H), 8.30 (s, 1H), 8.19-8.10 (m, 4H), 7.89 (s, 1H), 7.72 (t, *J* = 7.3 Hz, 1H), 6.80 (s, 2H), 4.78 (d, *J* = 4.8 Hz, 2H), 3.47 (s, 2H), 1.97 (d, *J* = 13.3 Hz, 2H), 1.65-1.61 (m, 3H), 1.54-1.41 (m, 5H), 1.24-1.16 (m, 3H), 0.73 (d, *J* = 8.5 Hz, 4H), 0.59 (d, *J* = 3.3 Hz, 4H). <sup>13</sup>C NMR (176 MHz; DMSO): δ 176.0, 169.8, 164.61, 164.58, 164.51, 150.48, 150.44, 146.43, 146.41, 145.1, 140.4, 139.5, 138.35, 138.33, 138.30, 135.4, 130.99, 130.96, 129.7, 128.6, 126.5, 122.9, 119.19, 119.14, 58.3, 42.5, 40.9, 40.5, 35.3, 32.1, 25.4, 21.5, 11.1. HRMS [M+H]<sup>+</sup> calculated 593.2876, observed 593.3080

**1-[[[3,5-Dicyclopropyl-4-{4-[(2-naphthylamino)methyl]-1*H*-1,2,3-triazol-1-yl]phenyl)methyl]carbonylamino}cyclohexanecarboxylic acid (4e)**

<sup>1</sup>H-NMR (700 MHz; DMSO-*d*<sub>6</sub>): δ 9.21 (t, *J* = 5.6 Hz, 1H), 8.50 (s, 1H), 8.29 (s, 1H), 8.09 (s, 1H), 8.03-7.96 (m, 4H), 7.63-7.58 (m, 2H), 6.81 (s, 2H), 4.71 (d, *J* = 5.6 Hz, 2H), 3.48 (s, 3H), 1.97 (d, *J* = 13.4 Hz, 2H), 1.64 (m, 2H), 1.55-1.41 (m, 5H), 1.23-1.17 (m, 3H), 0.73 (dd, *J* = 8.4, 1.7 Hz, 4H), 0.60-0.59 (m, 4H). <sup>13</sup>C NMR (176 MHz; DMSO): δ 176.0, 169.8, 166.8, 140.4, 139.5, 135.5, 134.6, 132.6, 132.2, 129.3, 128.3, 128.1, 127.2, 126.4, 124.7, 122.9, 58.3, 42.5, 40.9, 35.5, 32.1, 25.4, 21.5, 11.1. HRMS [M+H]<sup>+</sup> calculated 592.2923, observed 592.3123.

**1-[[[3,5-Dicyclopropyl-4-{4-[(2,2-difluoro-2*H*-1,3-benzodioxol-4-yl)carbonylamino)methyl]-1*H*-1,2,3-triazol-1-yl]phenyl)methyl]carbonylamino}cyclohexanecarboxylic acid. (4f)**

<sup>1</sup>H-NMR (700 MHz; DMSO-*d*<sub>6</sub>): δ 8.99 (t, *J* = 5.7 Hz, 1H), 8.27 (s, 1H), 8.09 (s, 1H), 7.55 (ddd, *J* = 19.1, 8.1, 1.1 Hz, 2H), 7.30 (t, *J* = 8.1 Hz, 1H), 6.82 (s, 2H), 4.65 (d, *J* = 5.7 Hz, 2H), 3.48 (s, 2H), 1.97 (d, *J* = 13.4 Hz, 2H), 1.64 (m, 2H), 1.55-1.40 (m, 5H), 1.25-1.16 (m, 3H), 0.73 (dd, *J* = 8.4, 1.8 Hz, 4H), 0.60-0.59 (m, 4H). <sup>13</sup>C NMR (176 MHz; DMSO): δ 176.0, 169.8, 162.5, 144.8, 143.6, 141.1, 140.3, 139.5, 135.5, 126.5, 125.5, 124.7, 124.0, 123.0, 119.3, 112.9, 58.3, 42.5, 40.5, 35.3, 32.1, 25.4, 21.5, 11.1. HRMS [M+H]<sup>+</sup> calculated 622.2477, observed 622.2701.

**1-[[[4-{4-[(5-Bromo-2-furylamino)methyl]-1*H*-1,2,3-triazol-1-yl]-3,5-dicyclopropylphenyl)methyl]carbonylamino}cyclohexanecarboxylic acid (4g)**

<sup>1</sup>H-NMR (700 MHz; DMSO-*d*<sub>6</sub>): δ 8.99 (t, *J* = 5.8 Hz, 1H), 8.99 (t, *J* = 5.8 Hz, 1H), 8.23 (s, 1H), 8.23 (s, 1H), 8.09 (s, 1H), 8.09 (s, 1H), 7.19 (d, *J* = 3.5 Hz, 1H), 7.19 (d, *J* = 3.5 Hz, 1H), 6.80 (s, 2H), 6.80 (s, 2H), 6.76 (d, *J* = 3.5 Hz, 1H), 6.76 (d, *J* = 3.5 Hz, 1H), 4.58 (d, *J* = 5.8 Hz, 2H), 4.58 (d, *J* = 5.8 Hz, 2H), 3.47 (s, 2H), 3.47 (s, 2H), 1.98-1.96 (m, 2H), 1.98-1.96 (m, 2H), 1.64-1.61 (m, 2H), 1.55-1.40 (m, 5H), 1.25-1.13 (m, 3H), 0.73 (dd, *J* = 8.4, 1.8 Hz, 4H), 0.60 (m, 4H). <sup>13</sup>C NMR (176 MHz; DMSO): δ 176.0, 169.8, 157.1, 152.7, 150.0, 140.4, 139.5, 135.4, 126.4, 124.9, 122.9, 116.5, 114.4, 58.3, 42.5, 40.50, 40.43, 34.6, 32.1, 25.4, 21.5, 11.0. HRMS [M+H]<sup>+</sup> calculated 612.1644, observed 612.1755.

**1-[[[4-{4-[(5-Bromo-3-thenylamino)methyl]-1*H*-1,2,3-triazol-1-yl]-3,5-dicyclopropylphenyl)methyl]carbonylamino}cyclohexanecarboxylic acid (4h)**

<sup>1</sup>H-NMR (700 MHz; DMSO-d<sub>6</sub>): δ 12.12 (s, 1H), 8.92 (t, *J* = 5.6 Hz, 1H), 8.24 (s, 1H), 8.16 (s, 1H), 8.09 (s, 1H), 7.62 (s, 1H), 6.80 (s, 2H), 4.60 (d, *J* = 5.6 Hz, 2H), 3.47 (s, 2H), 1.97 (d, *J* = 13.3 Hz, 2H), 1.66-1.62 (m, 2H), 1.55-1.41 (m, 5H), 1.23-1.14 (m, 3H), 0.73 (d, *J* = 8.5 Hz, 4H), 0.60 (d, *J* = 4.2 Hz, 4H). <sup>13</sup>C NMR (176 MHz; DMSO): δ 176.0, 169.8, 161.2, 145.1, 140.4, 139.5, 138.2, 135.4, 131.7, 130.0, 126.4, 122.9, 112.4, 58.3, 42.5, 35.0, 32.1, 25.4, 21.5, 11.1. HRMS [M+H]<sup>+</sup> calculated 628.1416, observed 628.1469.

**1-[[4-{4-[(5-Chloro-2-thenylamino)methyl]-1*H*-1,2,3-triazol-1-yl]-3,5-dicyclopropylphenyl)methyl]carbonylamino}cyclohexanecarboxylic acid (4i)**

<sup>1</sup>H-NMR (700 MHz; DMSO-d<sub>6</sub>): δ 9.17 (t, *J* = 5.7 Hz, 1H), 8.26 (s, 1H), 8.09 (s, 1H), 7.69 (d, *J* = 4.1 Hz, 1H), 7.19 (d, *J* = 4.0 Hz, 1H), 6.80 (s, 2H), 4.60 (d, *J* = 5.7 Hz, 2H), 3.47 (s, 2H), 1.97 (d, *J* = 13.2 Hz, 2H), 1.64-1.60 (m, 2H), 1.55-1.41 (m, 5H), 1.25-1.14 (m, 3H), 0.72 (dd, *J* = 8.4, 1.8 Hz, 4H), 0.60 (m, 4H). <sup>13</sup>C NMR (176 MHz; DMSO): δ 176.0, 169.8, 160.5, 144.8, 140.3, 139.52, 139.36, 135.4, 133.4, 128.68, 128.56, 126.5, 122.9, 58.3, 42.5, 35.1, 32.1, 25.4, 21.5, 11.1. HRMS [M+H]<sup>+</sup> calculated 582.1941, observed 582.2079.

**1-[[4-{4-[(3-Chloro-2-thenylamino)methyl]-1*H*-1,2,3-triazol-1-yl]-3,5-dicyclopropylphenyl)methyl]carbonylamino}cyclohexanecarboxylic acid (4j)**

<sup>1</sup>H-NMR (700 MHz; DMSO-d<sub>6</sub>): δ 8.65 (t, *J* = 5.7 Hz, 1H), 8.22 (s, 1H), 8.09 (s, 1H), 7.84 (d, *J* = 5.2 Hz, 1H), 7.15 (d, *J* = 5.2 Hz, 1H), 6.82 (s, 2H), 4.63 (d, *J* = 5.7 Hz, 2H), 3.48 (s, 2H), 1.97 (d, *J* = 13.3 Hz, 2H), 1.64-1.61 (m, 2H), 1.55-1.41 (m, 5H), 1.25-1.16 (m, 3H), 0.73 (dd, *J* = 8.4, 1.8 Hz, 4H), 0.59-0.60 (m, 4H). <sup>13</sup>C NMR (176 MHz; DMSO): δ 176.0, 169.8, 160.3, 144.8, 140.3, 139.5, 135.5, 132.0, 130.0, 129.6, 126.4, 124.2, 123.0, 58.3, 42.5, 35.5, 32.1, 25.4, 21.5, 11.1. HRMS [M+H]<sup>+</sup> calculated 582.1941, observed 582.2103

**1-[[3,5-Dicyclopropyl-4-{4-[(5-methyl-2-furylamino)methyl]-1*H*-1,2,3-triazol-1-yl}phenyl)methyl]carbonylamino}cyclohexanecarboxylic acid (4k)**

<sup>1</sup>H-NMR (700 MHz; DMSO-d<sub>6</sub>): δ 8.73 (t, *J* = 5.8 Hz, 1H), 8.19 (s, 1H), 8.09 (s, 1H), 7.03 (d, *J* = 3.3 Hz, 1H), 6.80 (s, 2H), 6.24 (dd, *J* = 3.3, 0.9 Hz, 1H), 4.57 (d, *J* = 5.8 Hz, 2H), 3.47 (s, 2H), 2.33 (s, 3H), 1.97 (d, *J* = 13.3 Hz, 2H), 1.64-1.61 (m, 2H), 1.55-1.41 (m, 5H), 1.25-1.13 (m, 3H), 0.73 (dd, *J* = 8.4, 1.8 Hz, 4H), 0.60 (m, 4H). <sup>13</sup>C NMR (176 MHz; DMSO): δ 181.9, 176.0, 169.8, 158.2, 154.7, 146.7, 140.4, 139.5, 135.4, 126.3, 122.8, 115.1, 108.6, 58.3, 42.5, 40.5, 34.5, 32.1, 25.4, 21.5, 13.9, 11.0. HRMS [M+H]<sup>+</sup> calculated 546.2716, observed 546.2851.

**1-[[4-{4-[(2-Bromo-1,3-thiazol-5-ylcarbonylamino)methyl]-1*H*-1,2,3-triazol-1-yl]-3,5-dicyclopropylphenyl)methyl]carbonylamino}cyclohexanecarboxylic acid (4l)**

<sup>1</sup>H-NMR (700 MHz; DMSO-d<sub>6</sub>): δ 9.38 (t, *J* = 5.7 Hz, 1H), 8.29 (s, 1H), 8.27 (s, 1H), 8.09 (s, 1H), 6.81 (s, 2H), 4.62 (d, *J* = 5.7 Hz, 2H), 3.47 (s, 2H), 1.97 (d, *J* = 13.4 Hz, 2H), 1.64-1.61 (m, 2H), 1.55-1.40 (m, 5H), 1.25-1.14 (m, 3H), 0.73 (dd, *J* = 8.4, 1.7 Hz, 4H), 0.60 (m, 4H). <sup>13</sup>C NMR (176 MHz; DMSO): δ 176.0, 169.8, 159.1, 144.5, 143.7, 140.35, 140.18, 139.9, 139.5, 135.4, 126.6, 122.9, 58.3, 42.5, 40.50, 40.44, 35.1, 32.1, 25.4, 21.5, 11.1. HRMS [M+H]<sup>+</sup> calculated 629.1368, observed 629.1422.

**1-[[4-{4-[(6-Bromo-2-pyridylcarbonylamino)methyl]-1*H*-1,2,3-triazol-1-yl]-3,5-dicyclopropylphenyl)methyl]carbonylamino}cyclohexanecarboxylic acid. (4m)**

<sup>1</sup>H-NMR (700 MHz; DMSO-d<sub>6</sub>): δ 9.15 (t, *J* = 6.0 Hz, 1H), 8.24 (s, 1H), 8.09-8.06 (m, 2H), 7.96 (t, *J* = 7.8 Hz, 1H), 7.87 (dd, *J* = 7.9, 0.8 Hz, 1H), 6.82 (s, 2H), 4.68 (d, *J* = 6.0 Hz, 2H), 3.47 (s, 2H), 1.97 (d, *J* = 13.3 Hz, 2H), 1.65-1.61 (m, 2H), 1.55-1.40 (m, 5H), 1.25-1.14 (m, 3H), 0.73 (dd, *J* = 8.4, 1.8 Hz, 4H), 0.59-0.60 (m, 4H). <sup>13</sup>C NMR (176 MHz; DMSO): δ 176.0, 169.8, 163.0, 151.7, 144.9, 141.5, 140.7, 140.4, 139.5, 135.4, 131.4, 126.4, 122.9, 122.1, 58.3, 42.5, 35.3, 32.1, 25.4, 21.5, 11.1. HRMS [M+H]<sup>+</sup> calculated 623.1804, observed 623.1932.

**1-[[[(3,5-Dicyclopropyl-4-{4-[(8-fluoro-2-quinolylcarbonylamino)methyl]-1H-1,2,3-triazol-1-yl]}phenyl)methyl]carbonylamino]cyclohexanecarboxylic acid. (4n)**

<sup>1</sup>H-NMR (700 MHz; DMSO-d<sub>6</sub>): δ 9.27 (t, *J* = 5.9 Hz, 1H), 8.67 (d, *J* = 8.6 Hz, 1H), 8.30 (s, 1H), 8.26 (d, *J* = 8.5 Hz, 1H), 8.09 (s, 1H), 7.93 (t, *J* = 4.5 Hz, 1H), 7.72 (t, *J* = 6.1 Hz, 2H), 6.80 (s, 2H), 4.78 (d, *J* = 5.9 Hz, 2H), 3.47 (s, 2H), 1.96 (d, *J* = 13.2 Hz, 2H), 1.65-1.61 (m, 2H), 1.54-1.41 (m, 5H), 1.24-1.16 (m, 3H), 0.73 (dd, *J* = 8.4, 1.8 Hz, 4H), 0.60-0.59 (m, 4H). <sup>13</sup>C NMR (176 MHz; DMSO): δ 176.0, 169.8, 164.2, 158.4, 156.9, 150.7, 144.9, 140.4, 139.5, 138.5, 136.6, 135.4, 130.9, 128.78, 128.74, 126.5, 124.56, 124.54, 122.9, 120.3, 115.13, 115.02, 58.3, 42.5, 40.9, 35.3, 32.1, 25.4, 21.5, 11.1. HRMS [M+H]<sup>+</sup> calculated 611.2788, observed 611.2778.

**1-[[[(3,5-Dicyclopropyl-4-{4-[(6-fluoro-2-quinolylcarbonylamino)methyl]-1H-1,2,3-triazol-1-yl]}phenyl)methyl]carbonylamino]cyclohexanecarboxylic acid. (4o/Antabactin)**

<sup>1</sup>H-NMR (700 MHz; DMSO-d<sub>6</sub>): δ 9.39 (t, *J* = 5.8 Hz, 1H), 8.57 (d, *J* = 8.5 Hz, 1H), 8.29 (s, 1H), 8.20 (dd, *J* = 13.8, 6.9 Hz, 2H), 8.09 (s, 1H), 7.92 (dd, *J* = 9.2, 2.2 Hz, 1H), 7.80 (td, *J* = 8.8, 2.5 Hz, 1H), 6.80 (s, 2H), 4.76 (d, *J* = 5.9 Hz, 2H), 3.47 (s, 2H), 1.96 (d, *J* = 13.3 Hz, 2H), 1.65-1.61 (m, 2H), 1.54-1.41 (m, 5H), 1.24-1.16 (m, 3H), 0.73 (dd, *J* = 8.4, 1.8 Hz, 4H), 0.60-0.56 (m, 4H). <sup>13</sup>C NMR (176 MHz; DMSO): δ 176.0, 169.8, 164.4, 161.7, 160.3, 150.2, 145.0, 143.7, 140.4, 139.5, 137.9, 135.4, 132.63, 132.57, 126.4, 122.9, 121.36, 121.21, 119.9, 111.75, 111.63, 58.3, 42.5, 40.9, 35.3, 32.1, 25.4, 21.5, 11.1. HRMS [M+H]<sup>+</sup> calculated 611.2788, observed 611.2785

**1-[[[(4-{4-[(7-Bromo-2-quinolylcarbonylamino)methyl]-1H-1,2,3-triazol-1-yl]}-3,5-dicyclopropylphenyl)methyl]carbonylamino]cyclohexanecarboxylic acid. (4p)**

<sup>1</sup>H-NMR (700 MHz; DMSO-d<sub>6</sub>): δ 9.39 (s, 1H), 8.61 (d, *J* = 8.5 Hz, 1H), 8.30 (d, *J* = 7.1 Hz, 2H), 8.21 (d, *J* = 7.9 Hz, 1H), 8.09-8.06 (m, 2H), 7.86 (d, *J* = 8.7 Hz, 1H), 6.80 (s, 2H), 4.77 (d, *J* = 5.9 Hz, 2H), 3.47 (s, 2H), 1.97 (d, *J* = 13.3 Hz, 2H), 1.65-1.61 (m, 2H), 1.54-1.42 (m, 5H), 1.22-1.16 (m, 3H), 0.73 (dd, *J* = 8.4, 1.8 Hz, 4H), 0.60-0.59 (m, 4H). <sup>13</sup>C NMR (176 MHz; DMSO): δ 176.0, 169.8, 164.2, 151.4, 147.0, 144.9, 140.4, 139.5, 138.6, 135.4, 131.62, 131.47, 130.6, 128.1, 126.5, 124.2, 122.9, 119.7, 58.3, 42.5, 40.9, 35.3, 32.1, 25.4, 21.5, 11.1.

**1-[[[(3,5-Dicyclopropyl-4-{4-[(7-ethynyl-2-quinolylcarbonylamino)methyl]-1H-1,2,3-triazol-1-yl]}phenyl)methyl]carbonylamino]cyclohexanecarboxylic acid. (4q)**

<sup>1</sup>H-NMR (700 MHz; DMSO-d<sub>6</sub>): δ 9.40 (t, *J* = 6.0 Hz, 1H), 8.60 (d, *J* = 8.5 Hz, 1H), 8.30 (s, 1H), 8.20 (d, *J* = 8.8 Hz, 2H), 8.11 (d, *J* = 8.8 Hz, 2H), 7.74 (d, *J* = 8.4 Hz, 1H), 6.80 (s, 2H), 4.76 (d, *J* = 6.0 Hz, 2H), 4.51 (s, 1H), 3.47 (s, 2H), 1.96 (d, *J* = 13.3 Hz, 2H), 1.63 (m, 2H), 1.54-1.42 (m, 5H), 1.23-1.16 (m, 3H), 0.73 (dd, *J* = 8.4, 1.8 Hz, 4H), 0.60-0.59 (m, 4H). <sup>13</sup>C NMR (176 MHz; DMSO): δ 176.0, 169.8, 164.3, 151.4, 145.9, 144.9,



140.3, 139.5, 138.4, 135.4, 132.9, 132.5, 131.9, 130.8, 129.3, 129.2, 126.5, 124.2, 122.9, 119.9, 83.9, 83.2, 58.3, 42.5, 35.3, 32.1, 25.4, 21.5, 11.1.

**1-[(4-[4-((7-[1-(3-{3',6'-Bis(dimethylamino)-3-oxospiro[isobenzofuran-1,9'-xanthen]-5-ylcarbonylamino}propyl)-1*H*-1,2,3-triazol-4-yl]-2-quinolylcarbonylamino)methyl)-1*H*-1,2,3-triazol-1-yl]-3,5-dicyclopropylphenyl)methyl]carbonylamino]cyclohexanecarboxylic acid. (4r/TAMRA-ANT)**

<sup>1</sup>H-NMR (700 MHz; DMSO-*d*<sub>6</sub>): δ 9.40 (t, *J* = 5.2 Hz, 1H), 8.91 (d, *J* = 26.2 Hz, 2H), 8.61-8.57 (m, 2H), 8.47 (s, 1H), 8.30 (s, 1H), 8.24-8.16 (m, 4H), 8.07 (s, 1H), 7.31 (d, *J* = 7.9 Hz, 1H), 6.80 (s, 2H), 6.46 (dt, *J* = 21.1, 11.5 Hz, 6H), 4.78 (d, *J* = 5.2 Hz, 2H), 4.59 (t, *J* = 6.5 Hz, 2H), 3.47-3.44 (m, 4H), 2.94 (s, 12H), 2.26 (t, *J* = 6.5 Hz, 2H), 1.97 (d, *J* = 12.1 Hz, 2H), 1.64-1.61 (m, 3H), 1.53-1.40 (m, 5H), 1.23-1.18 (m, 3H), 0.73 (dd, *J* = 8.4, 1.8 Hz, 4H), 0.60-0.59 (m, 4H). <sup>13</sup>C NMR (176 MHz; DMSO): δ 169.7, 168.8, 165.4, 164.5, 155.3, 152.58, 152.41, 151.0, 146.9, 145.9, 144.9, 140.4, 139.6, 138.2, 136.4, 135.4, 135.0, 133.3, 129.4, 128.82, 128.79, 127.3, 126.4, 126.2, 124.66, 124.62, 123.6, 123.3, 122.9, 119.1, 109.4, 106.0, 98.4, 85.2, 48.30, 48.23, 48.15, 48.13, 42.5, 40.5, 37.4, 35.3, 32.1, 29.99, 29.94, 25.4, 21.5, 11.1. HRMS [M+H]<sup>+</sup> calculated 1129.5048, observed 1129.5059.

**1-[(3,5-Dicyclopropyl-4-[4-(*p*-tolyl)-1*H*-1,2,3-triazol-1-yl]phenyl)methyl]carbonylamino]cyclohexanecarboxylic acid. (T1)**

<sup>1</sup>H-NMR (700 MHz; DMSO-*d*<sub>6</sub>): δ 12.15 (s, 1H), 8.87 (s, 1H), 8.12 (s, 1H), 7.85 (d, *J* = 7.7 Hz, 2H), 7.30 (d, *J* = 7.8 Hz, 2H), 6.85 (s, 2H), 3.50 (s, 2H), 2.35 (s, 3H), 1.98 (d, *J* = 13.2 Hz, 2H), 1.67-1.63 (m, 2H), 1.56-1.42 (m, 5H), 1.27-1.22 (m, 3H), 0.76 (d, *J* = 8.6 Hz, 4H), 0.63 (m, 4H). <sup>13</sup>C NMR (176 MHz; DMSO): δ 176.0, 169.8, 146.8, 140.4, 139.7, 137.8, 135.4, 129.9, 128.3, 125.7, 124.5, 123.0, 58.3, 42.5, 32.1, 25.4, 21.53, 21.34, 11.1. HRMS [M+H]<sup>+</sup> calculated 500.2742, observed 500.2886.

**<sup>1</sup>H-NMR data for AA1 purchased from Life Chemicals and used in our experiments.**

<sup>1</sup>H-NMR(400 MHz; DMSO-*d*<sub>6</sub>): δ 7.32-7.22 (m, 5H), 5.15 (s, 2H), 3.88 (t, *J* = 7.2 Hz, 2H), 3.44 (s, 2H), 2.76-2.75 (m, 4H), 2.60 (dd, *J* = 10.1, 5.9 Hz, 2H), 2.40-2.32 (m, 4H), 2.15 (quintet, *J* = 7.5 Hz, 2H).

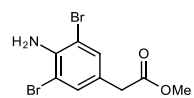

**1a**

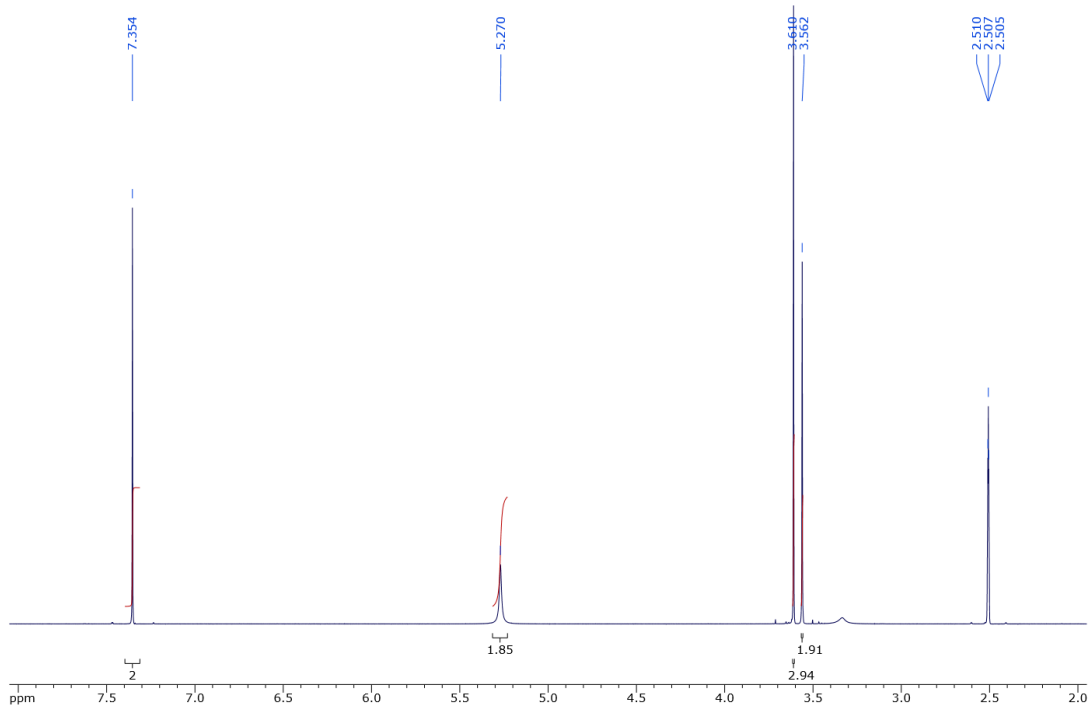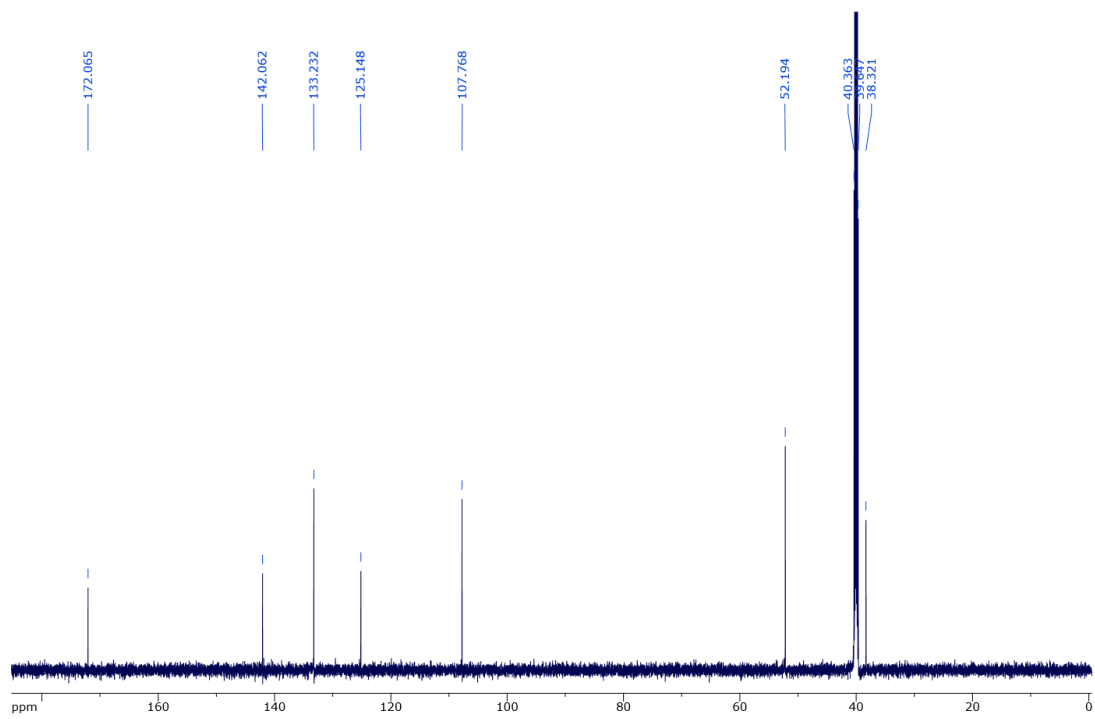

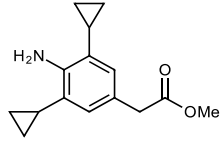

**1b**

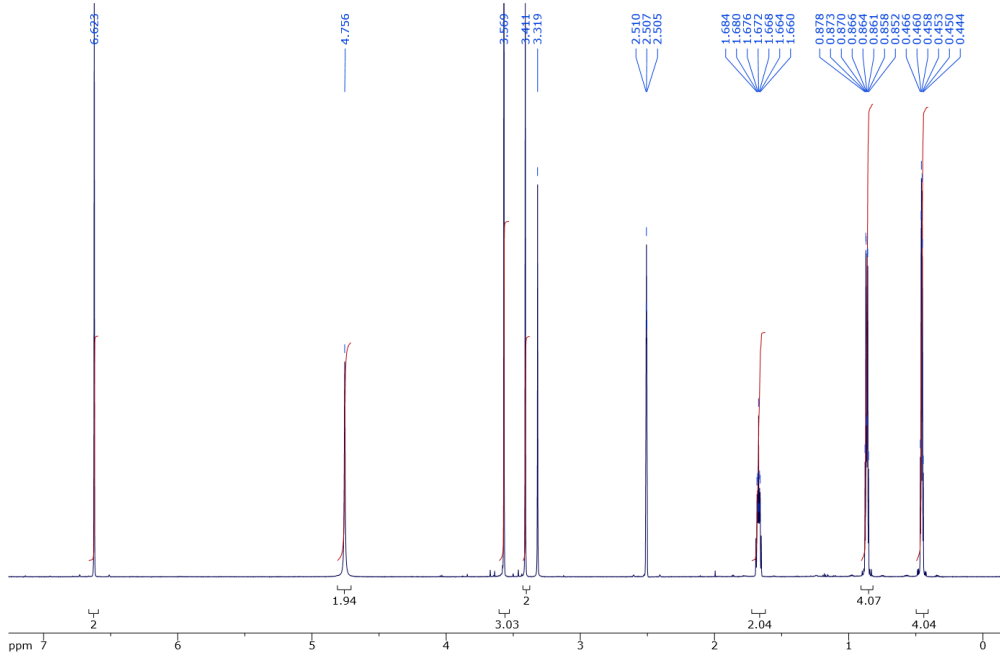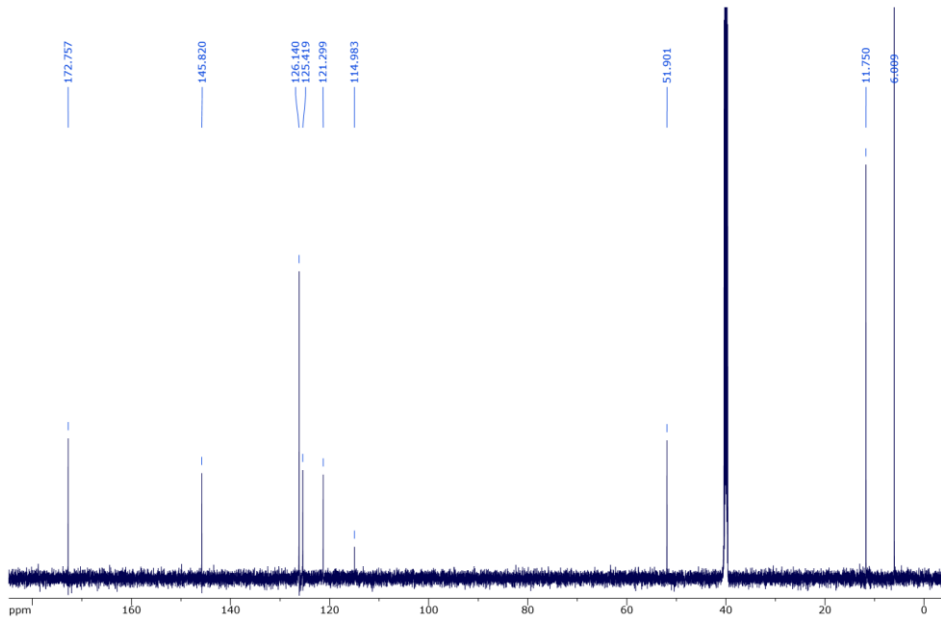

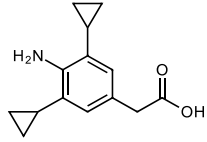

**1c**

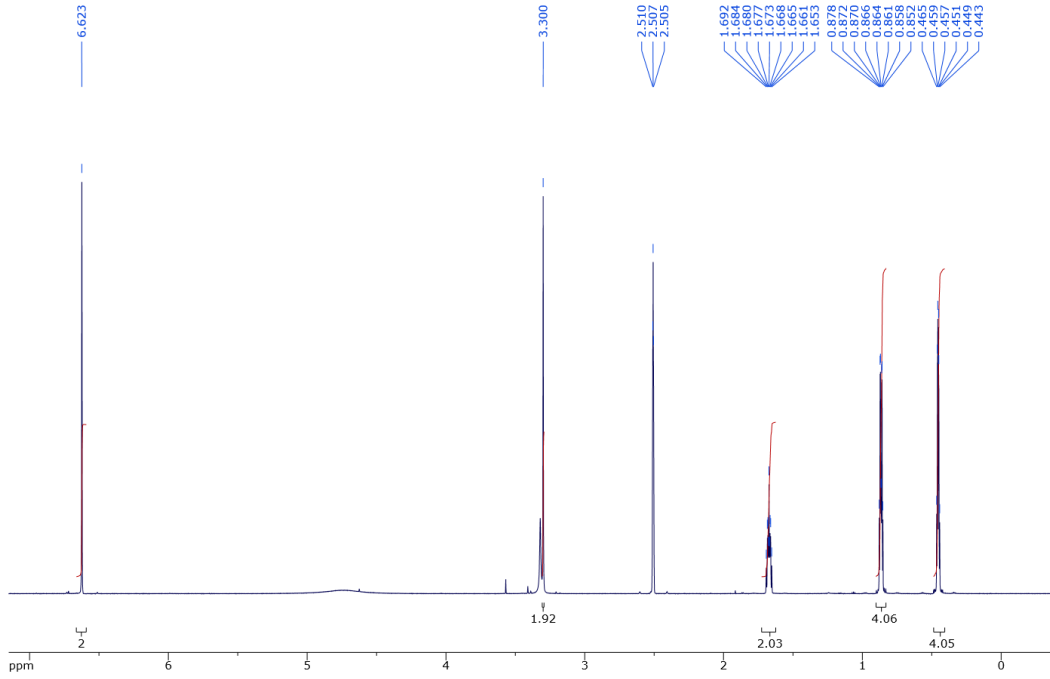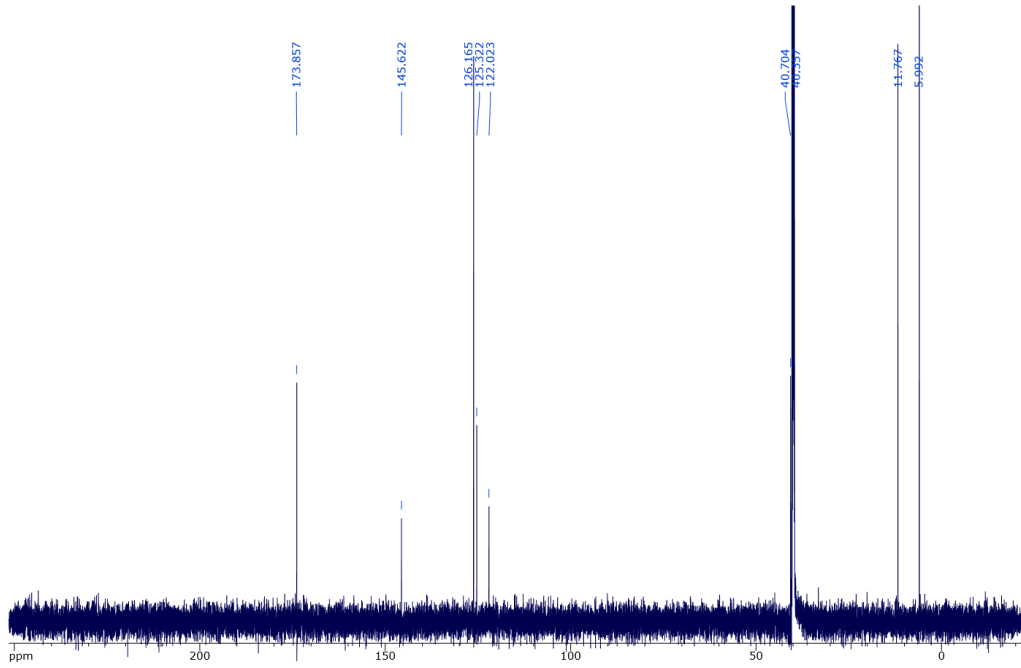

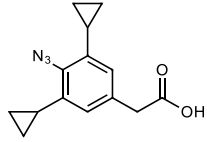

**1d**

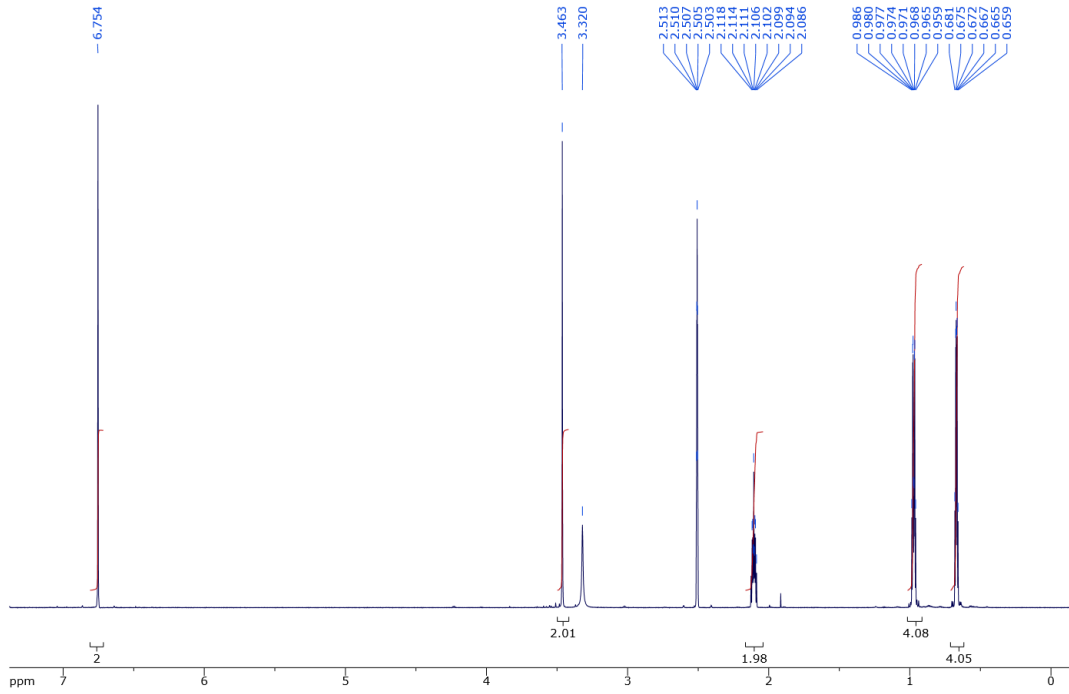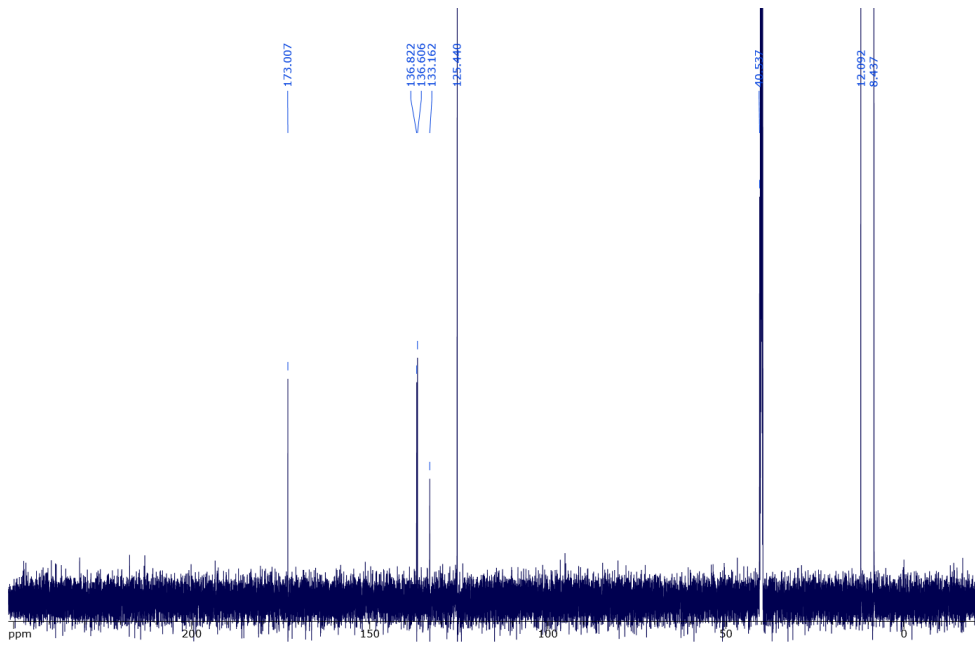

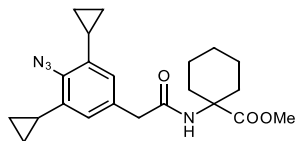

**2a**

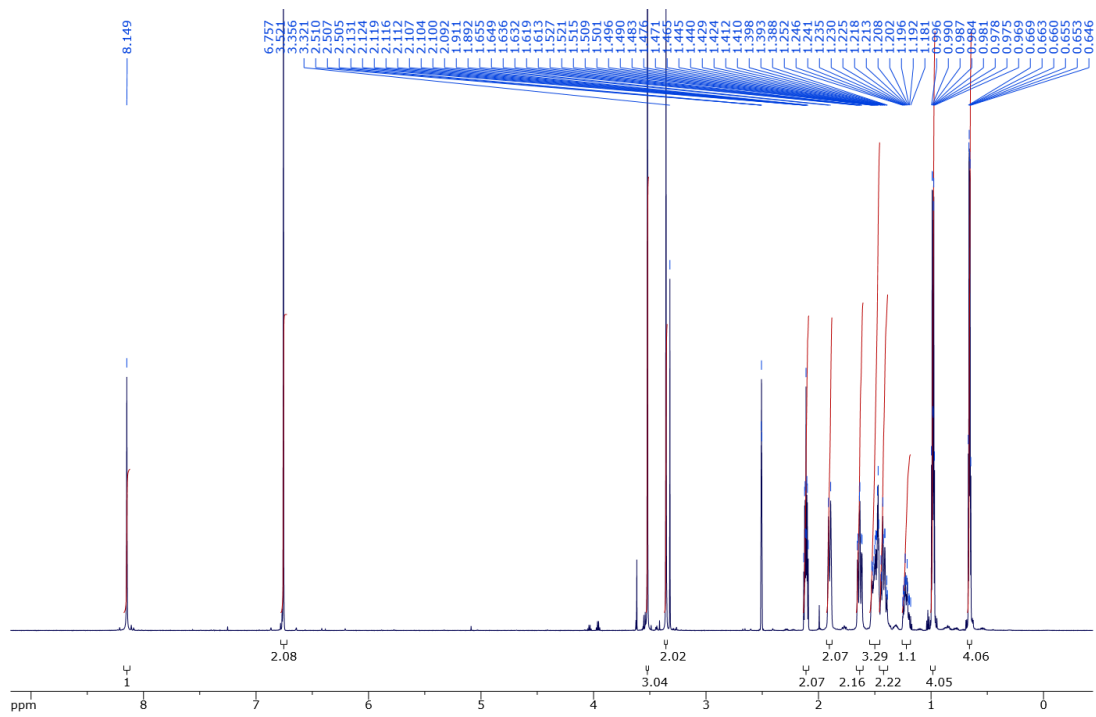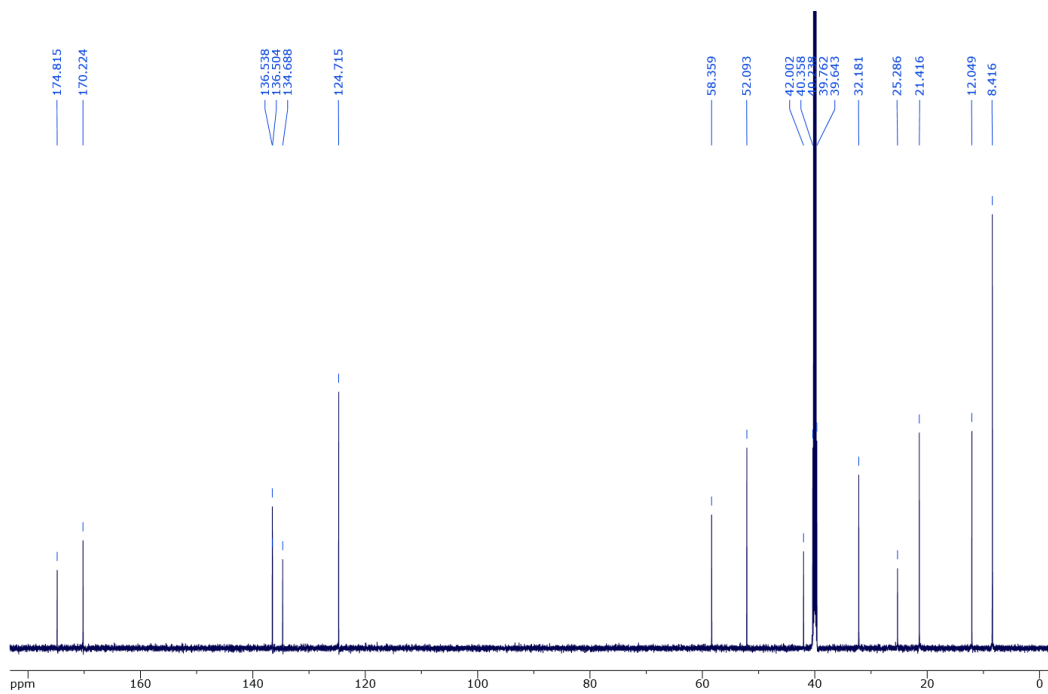

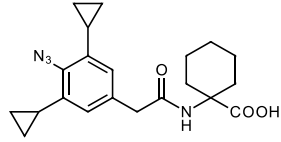

**2b**

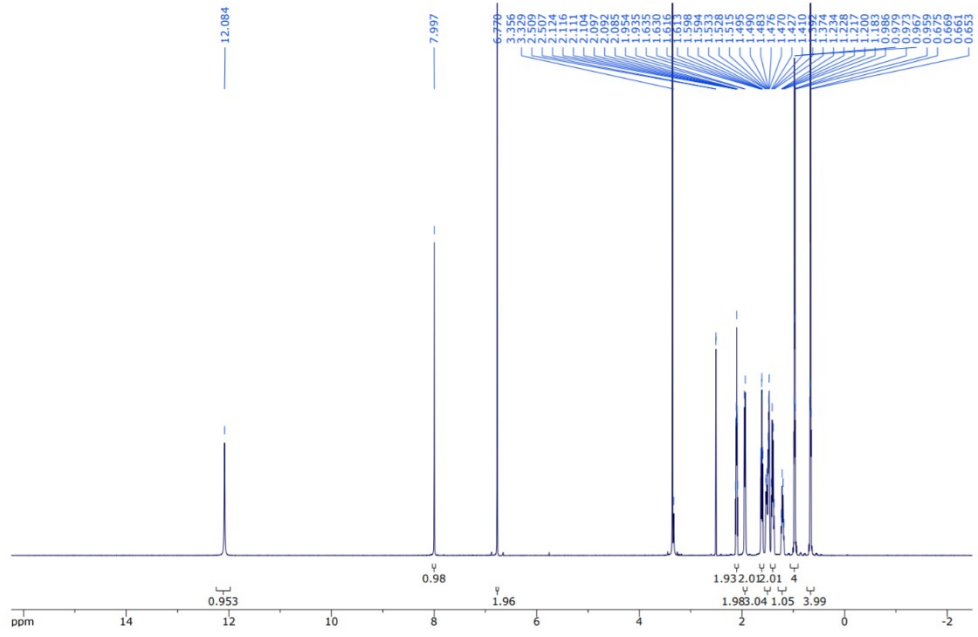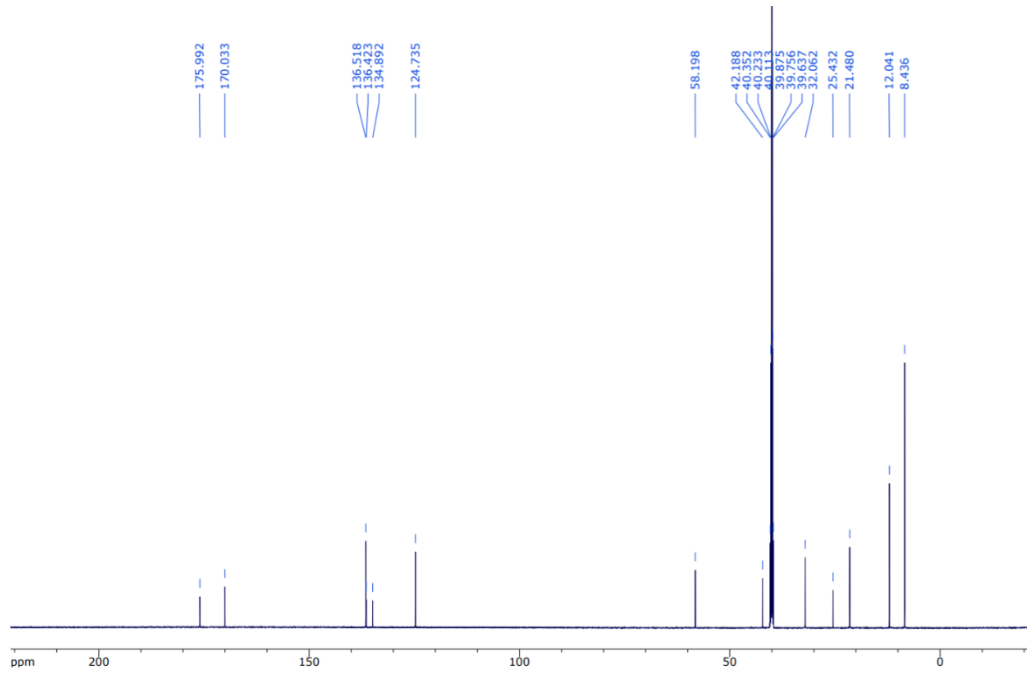

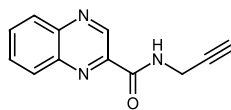

**3a**

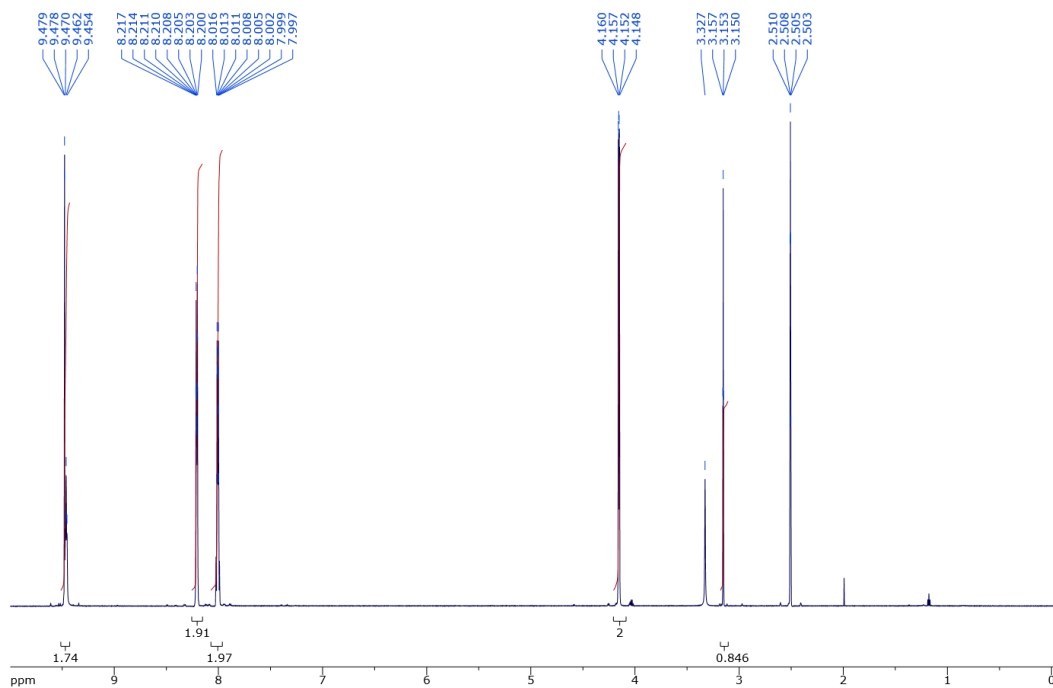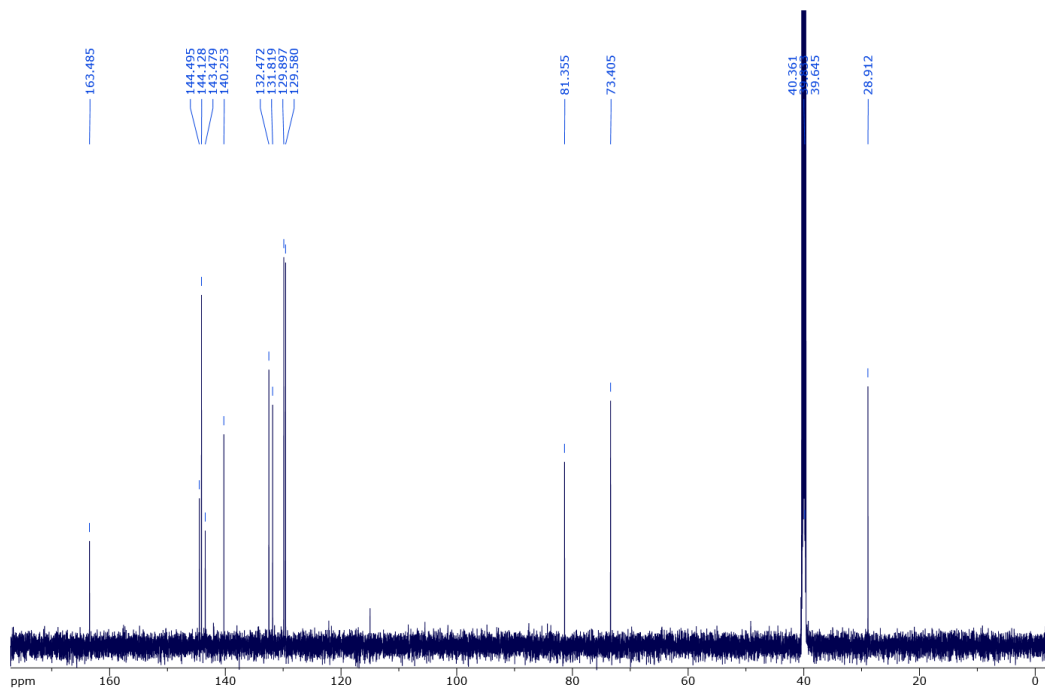



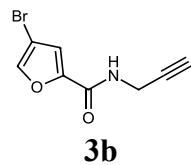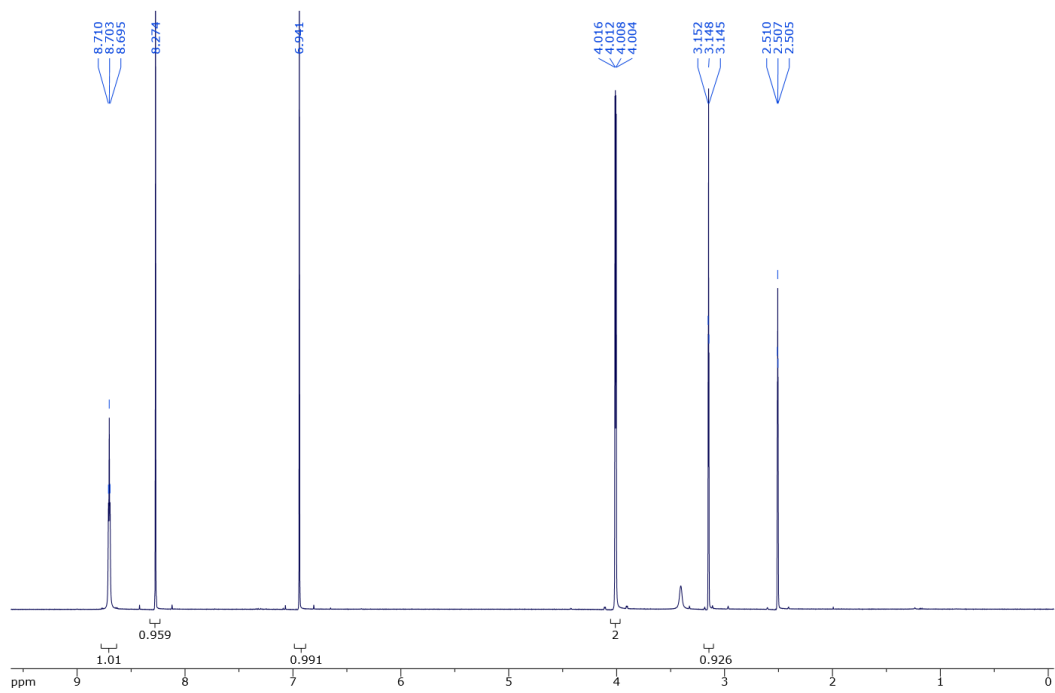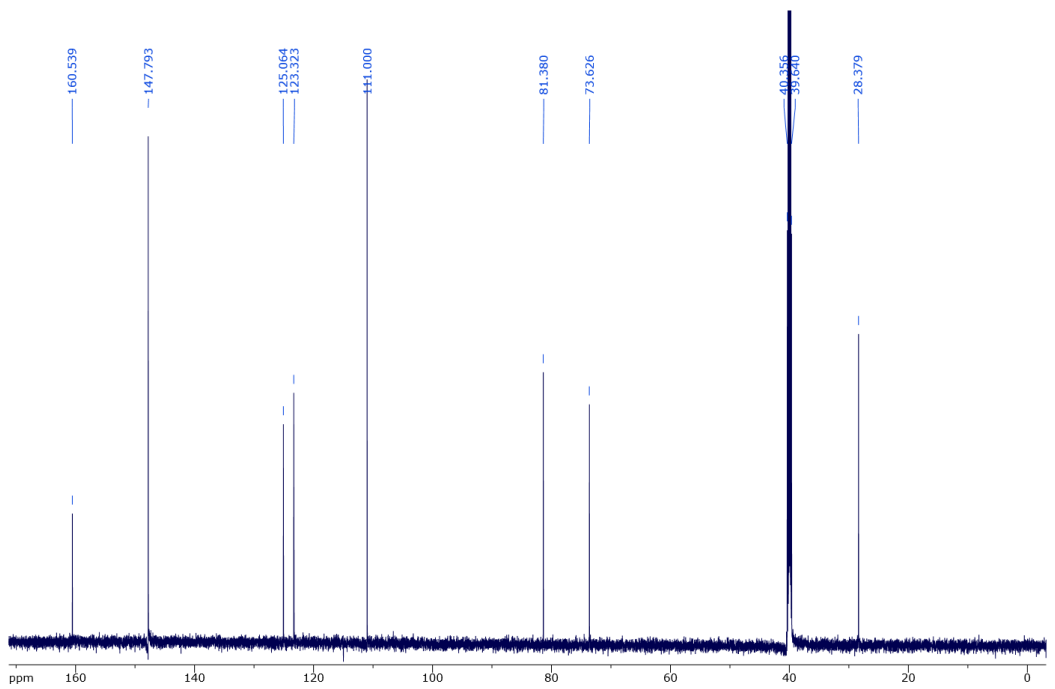

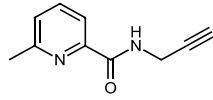

**3c**

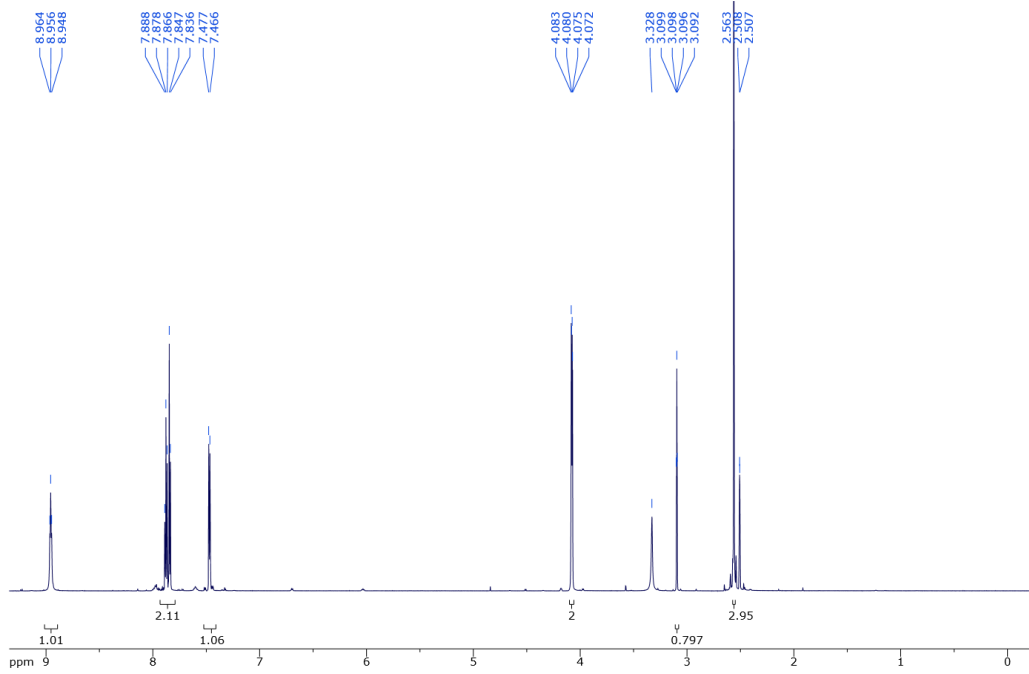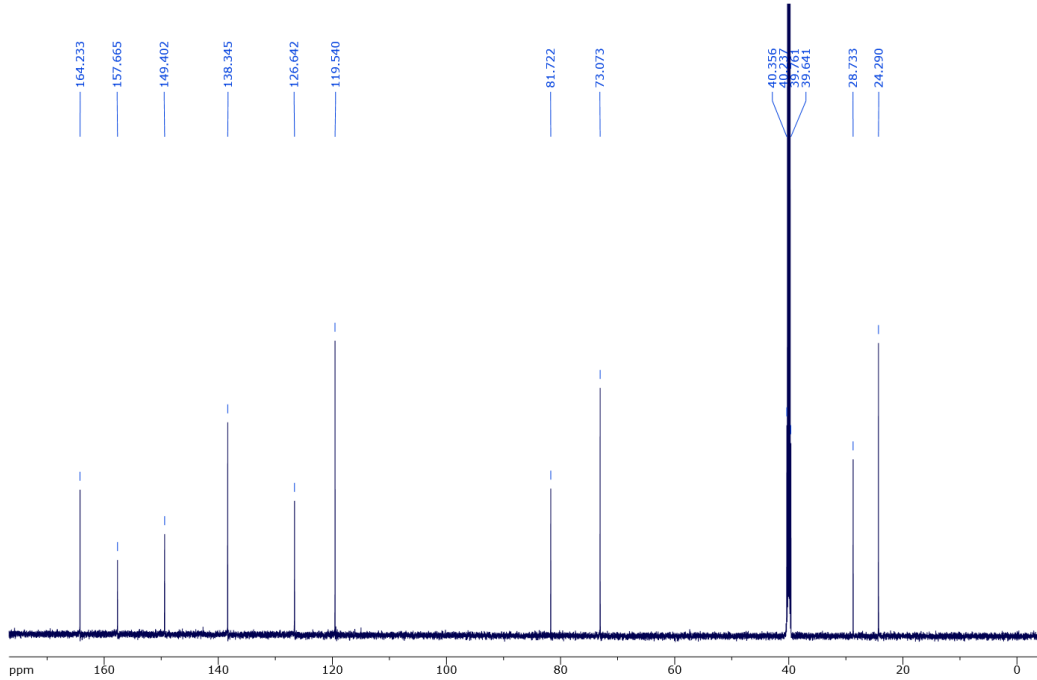



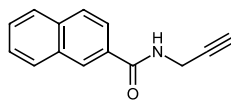

**3e**

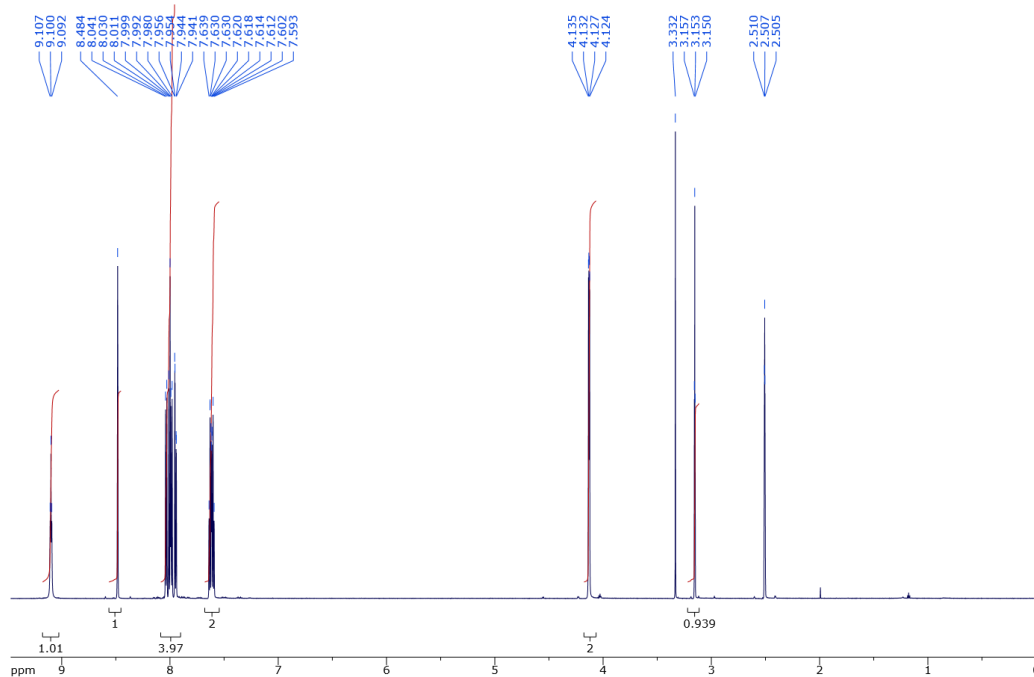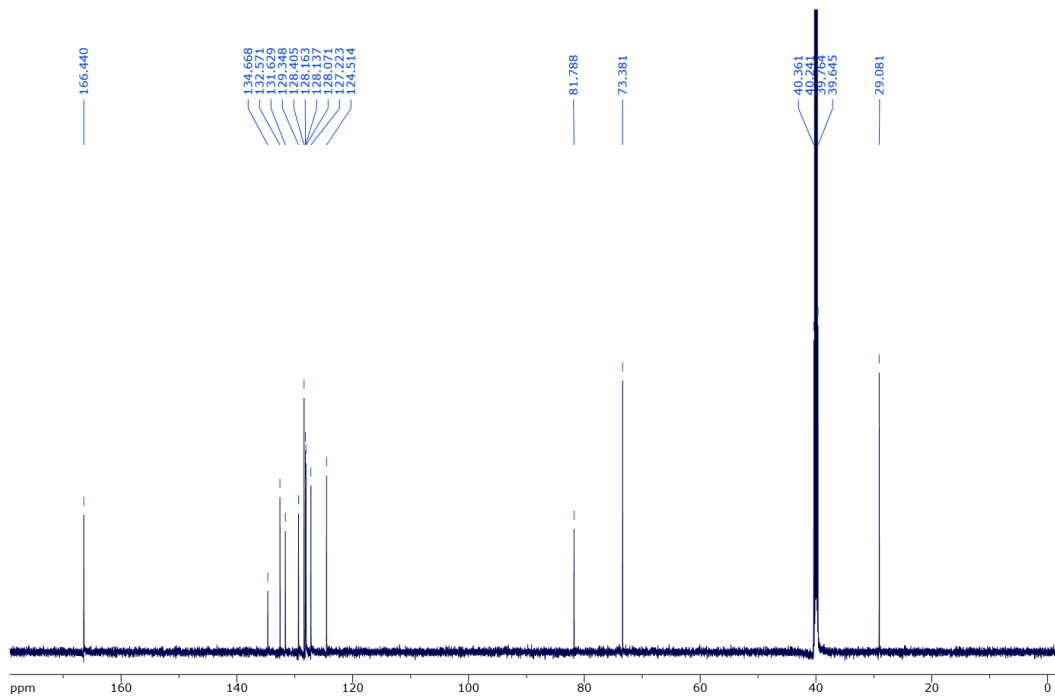

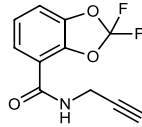

**3f**

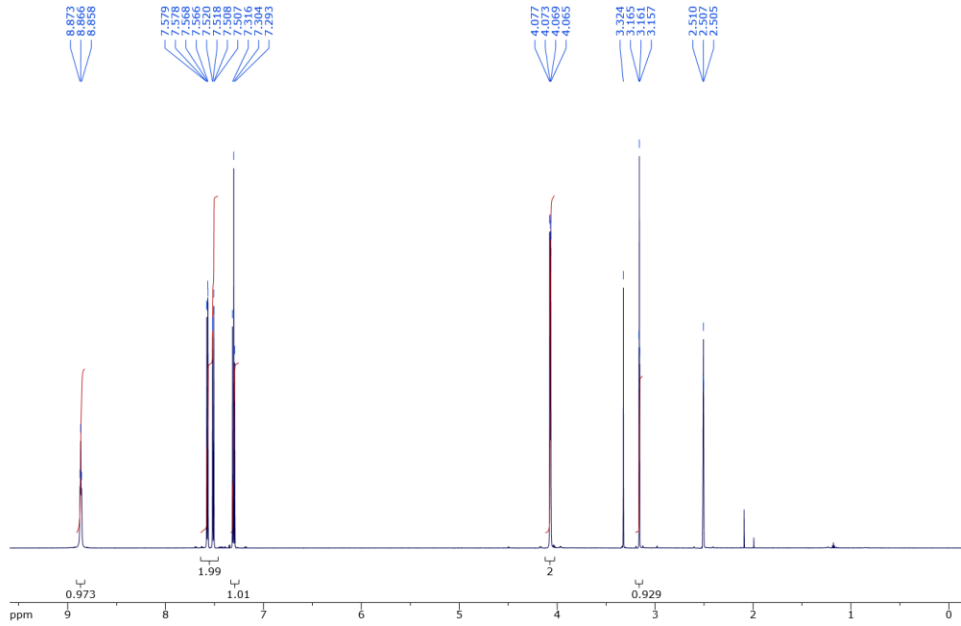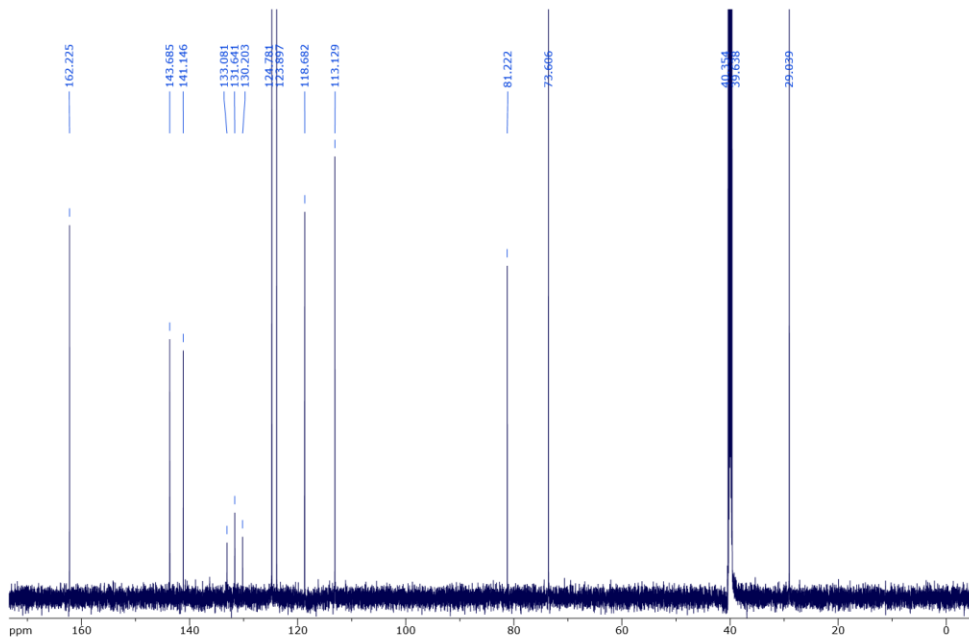

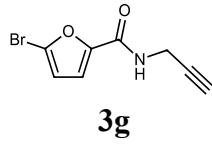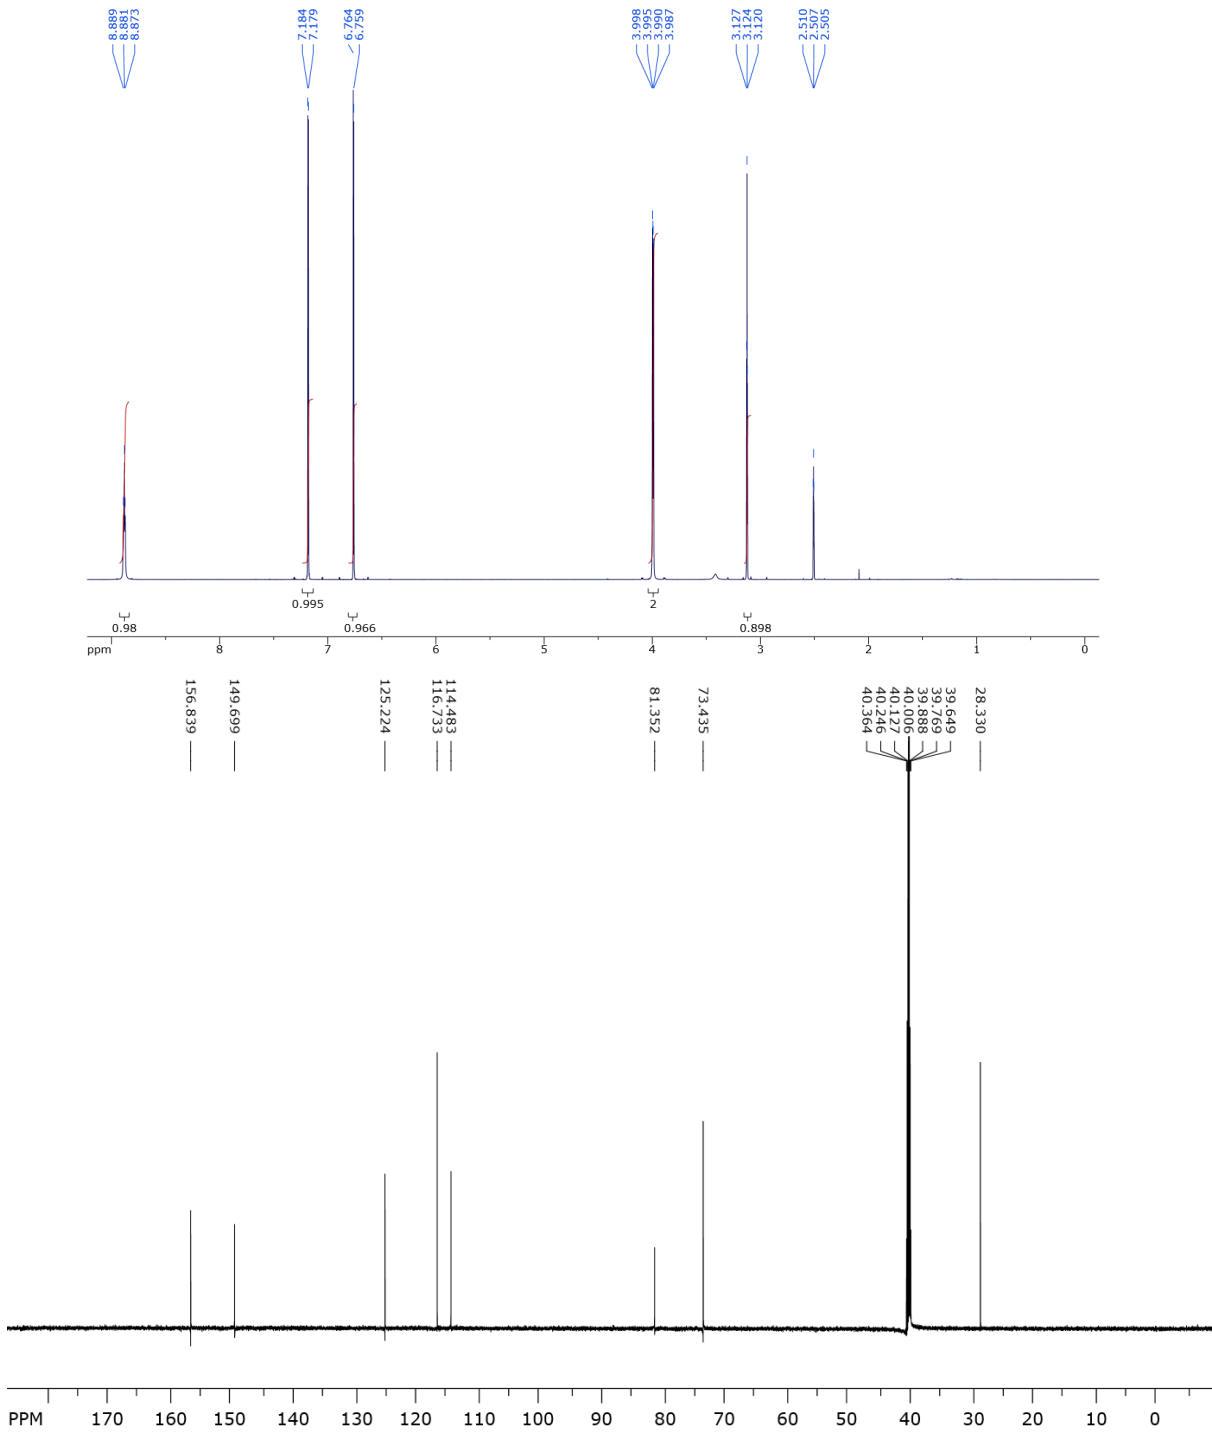

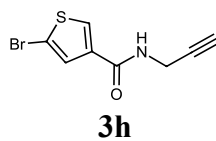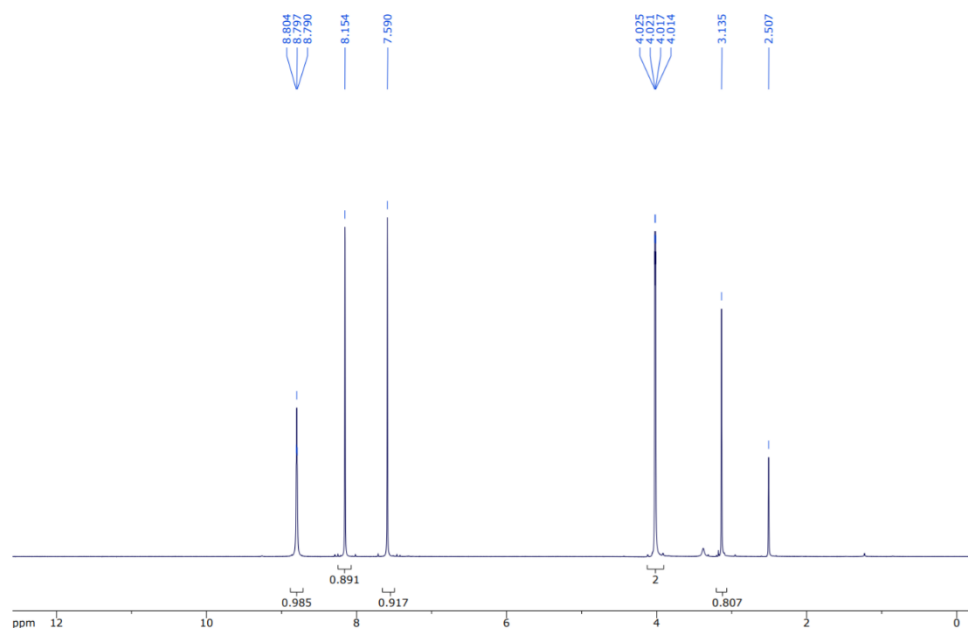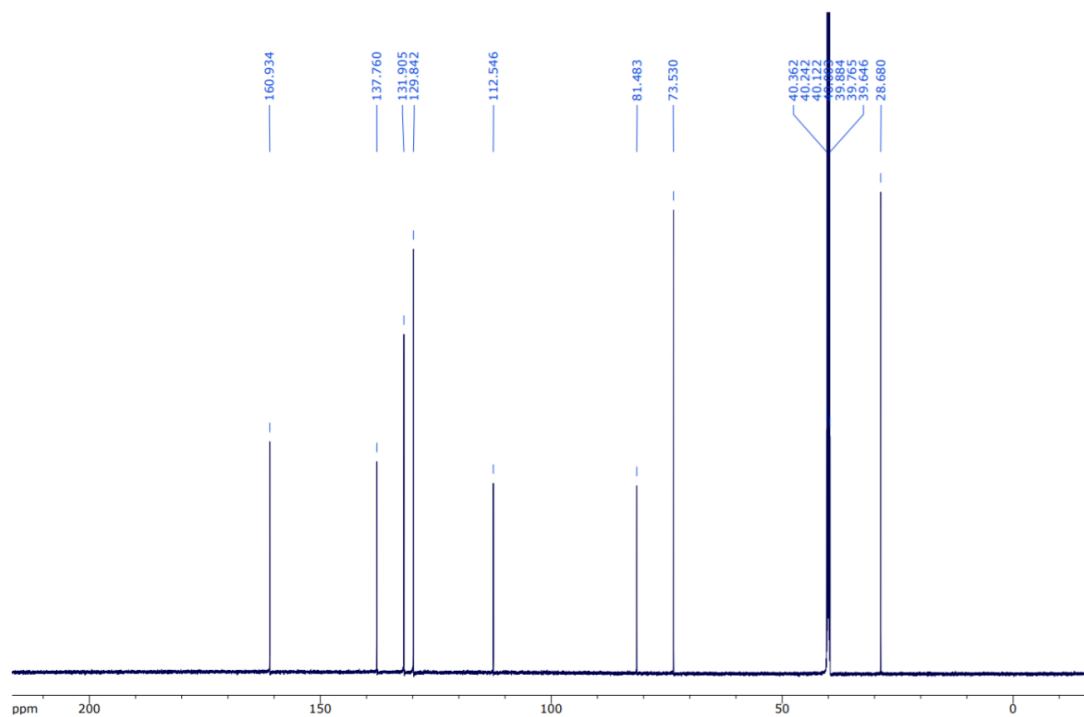

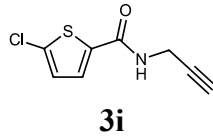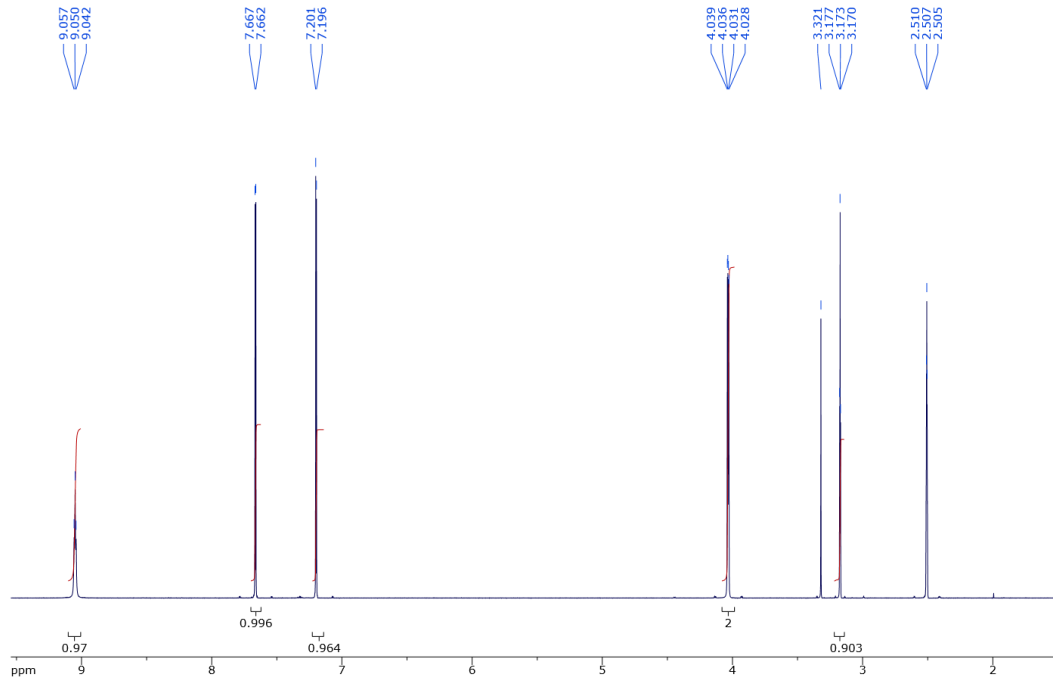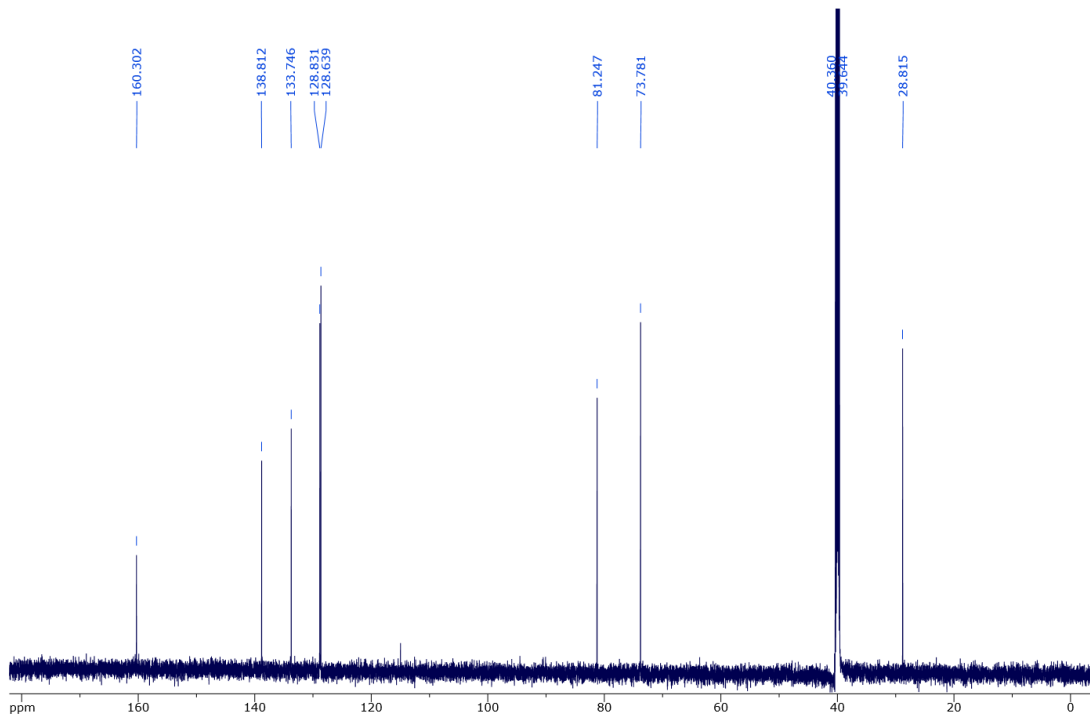



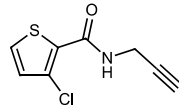

**3j**

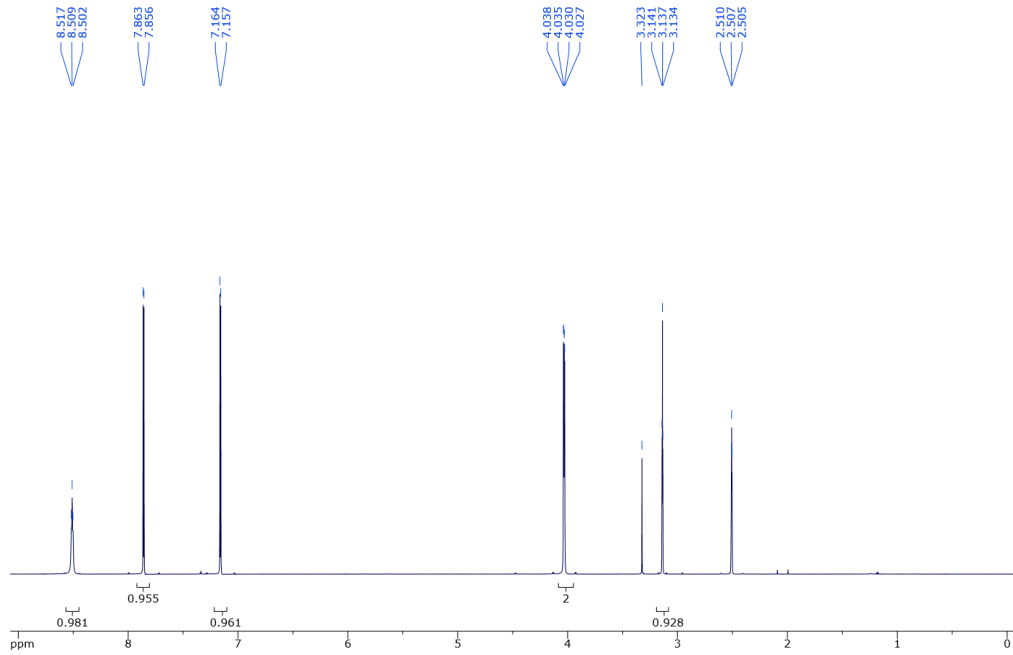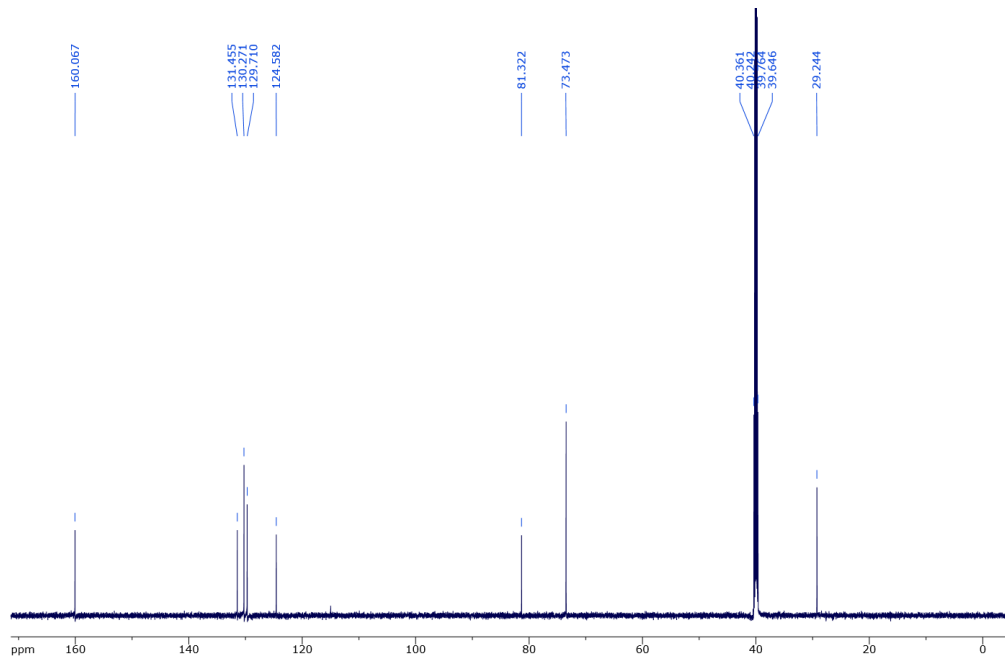

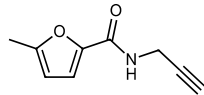

**3k**

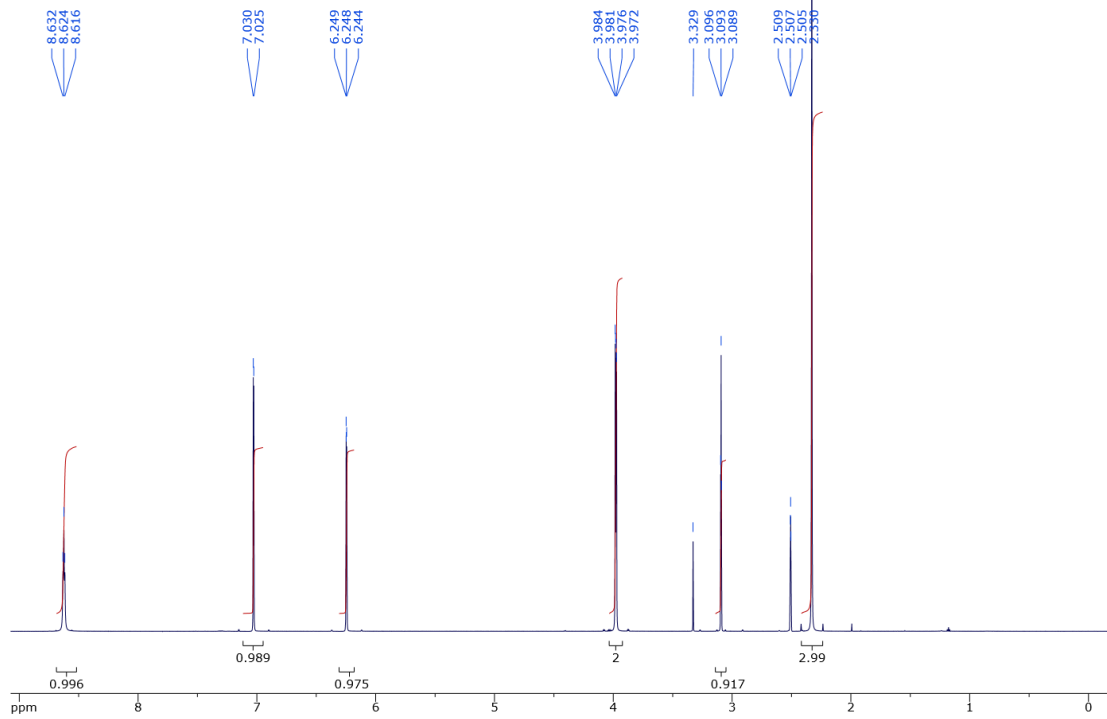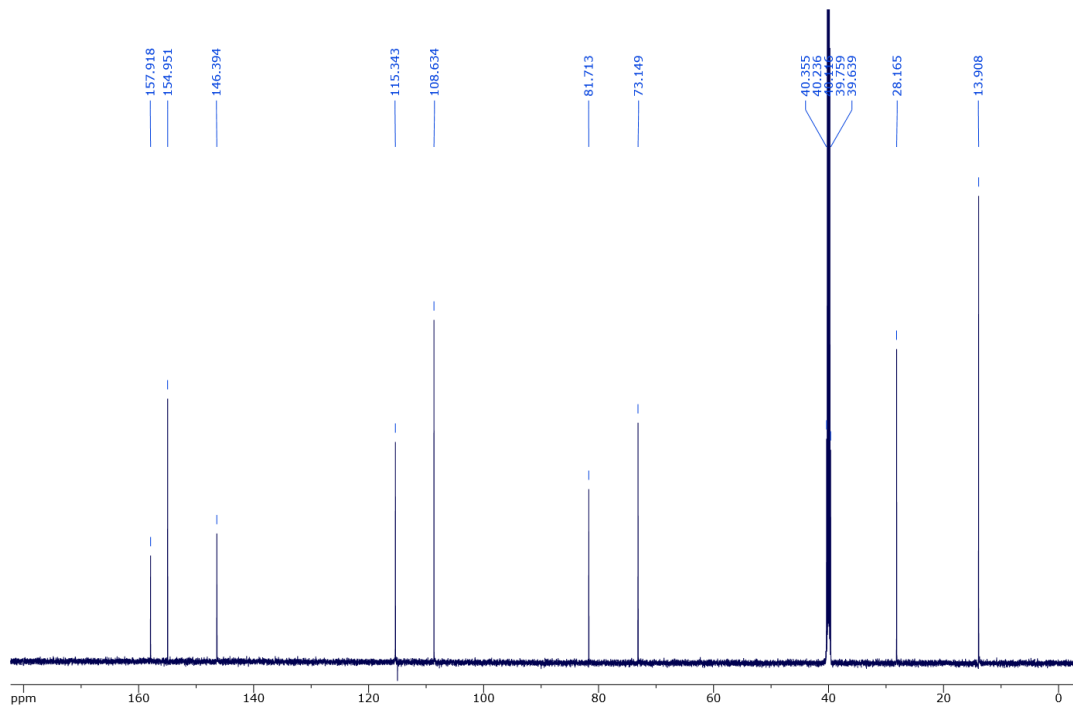

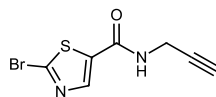

**31**

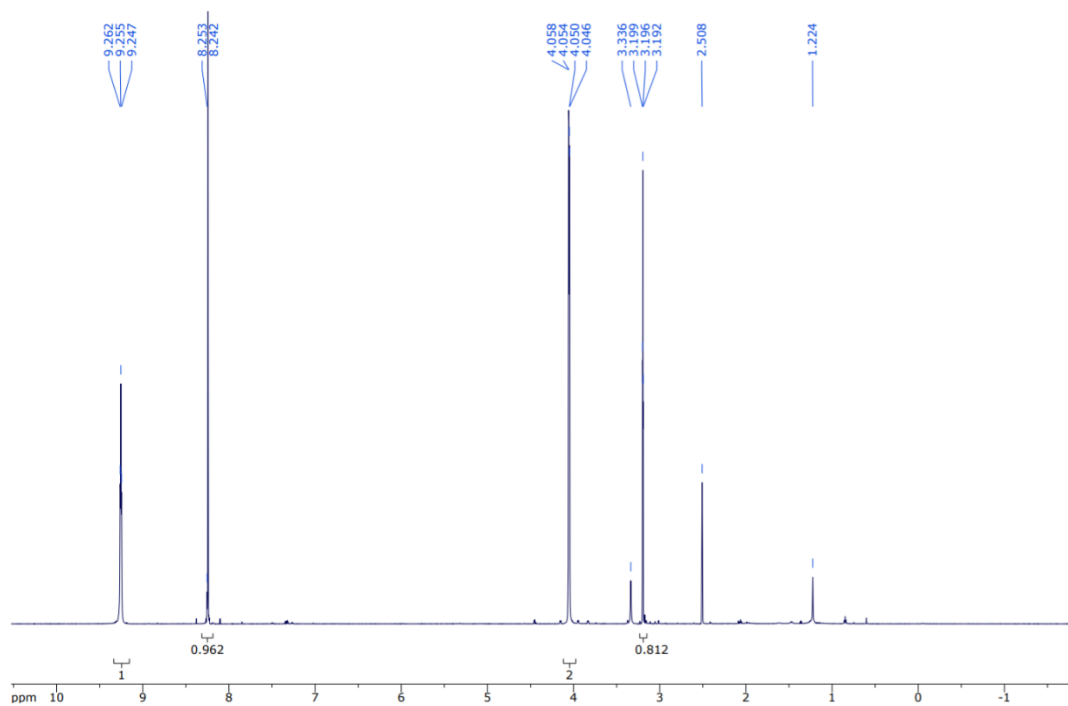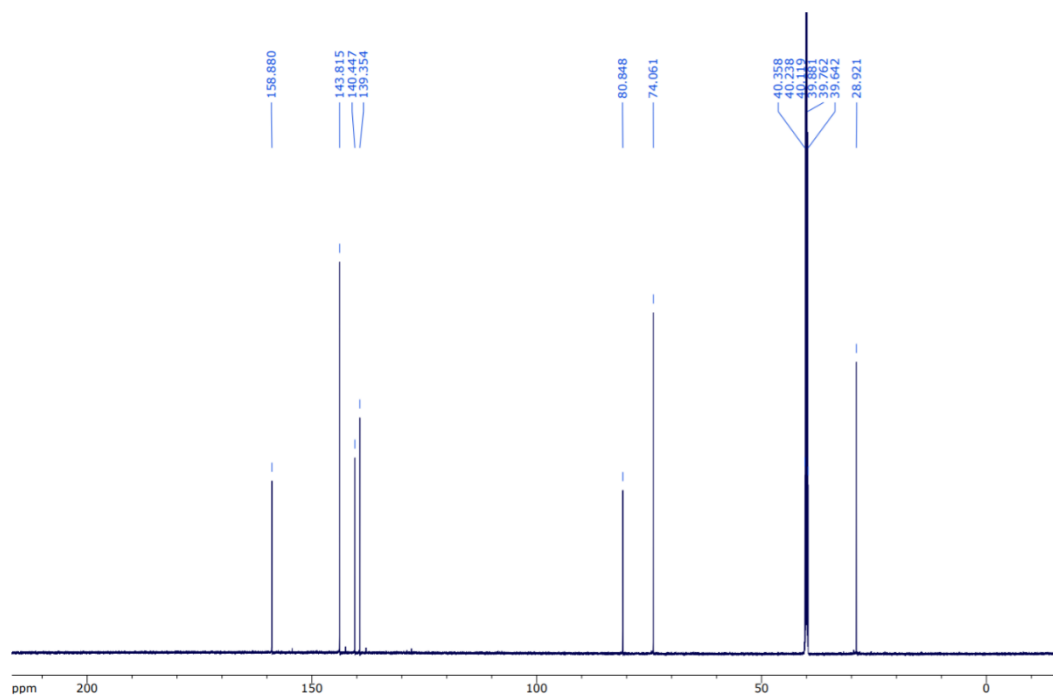

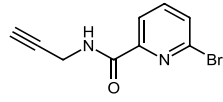

**3m**

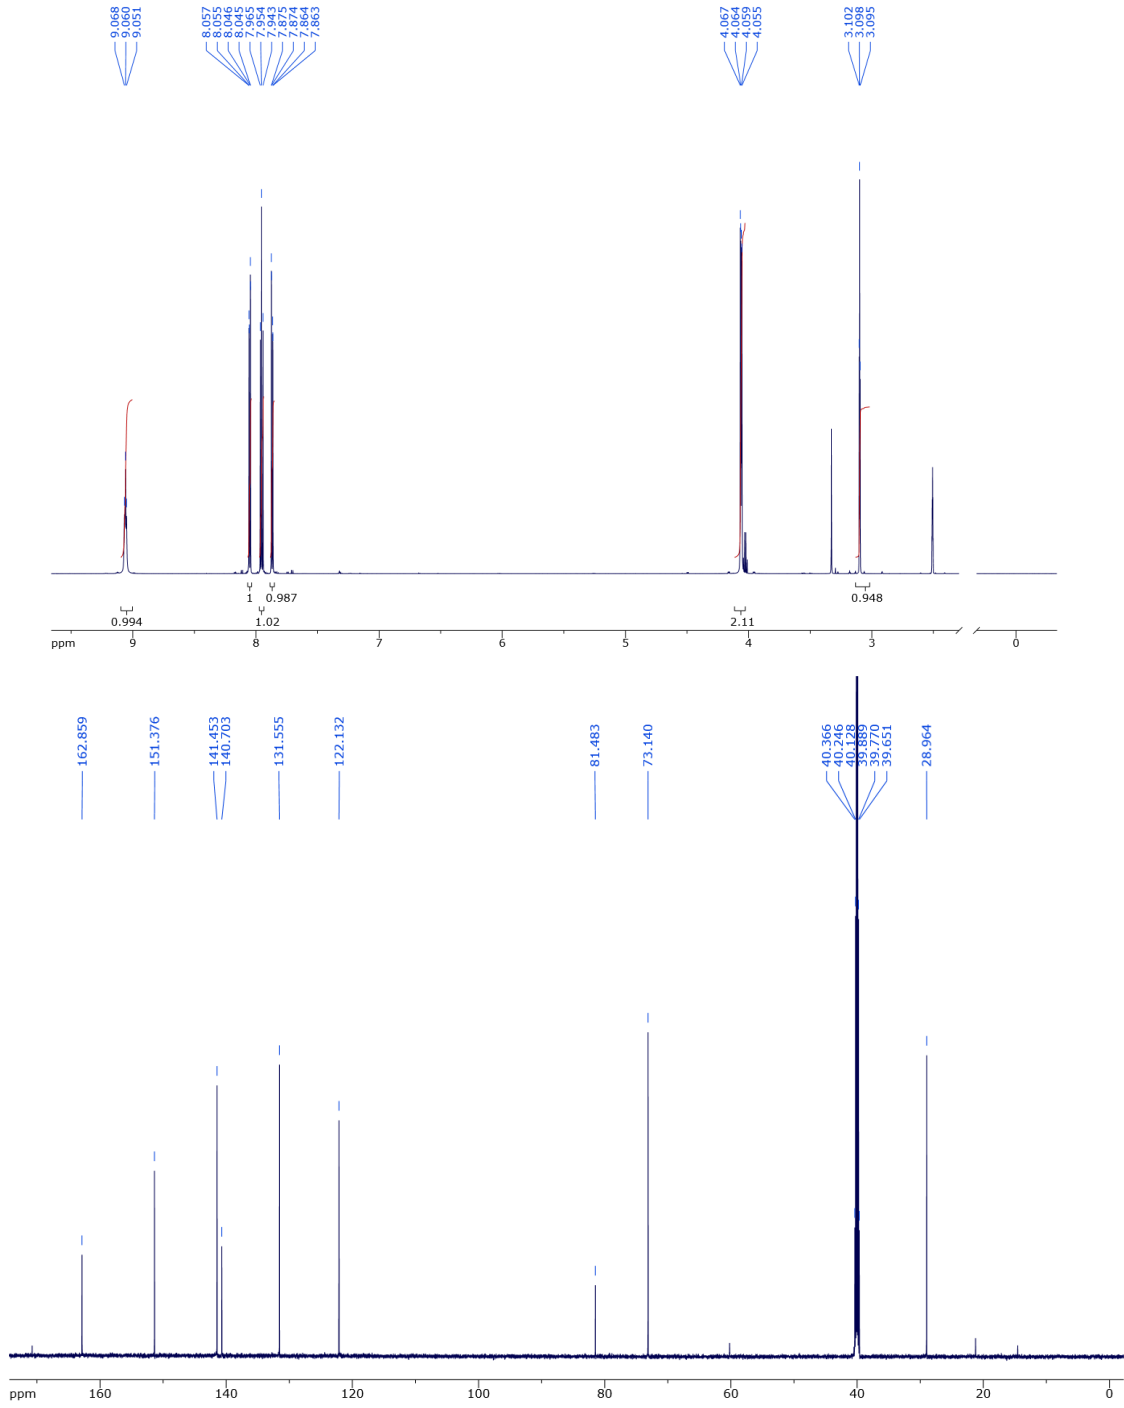

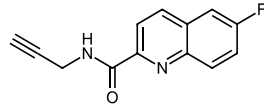

**30**

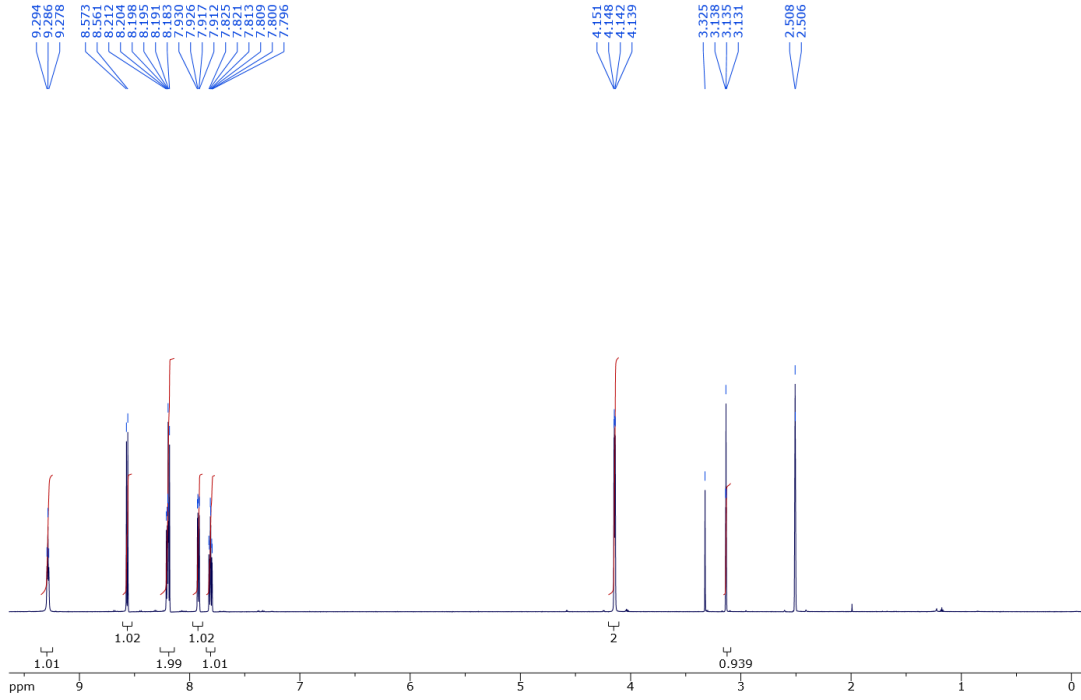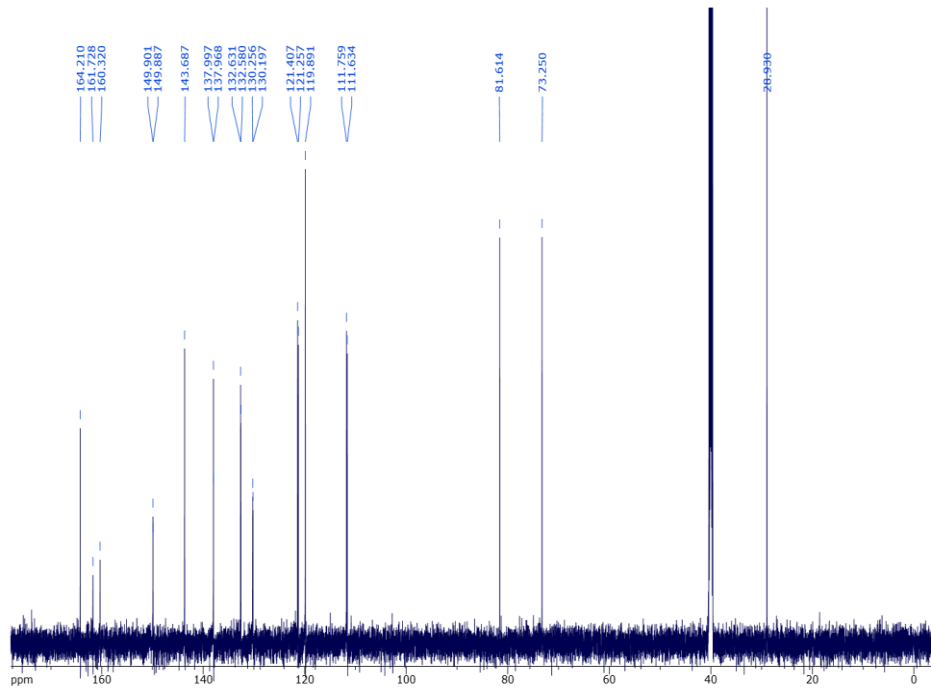

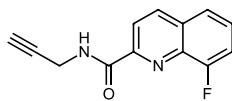

**3n**

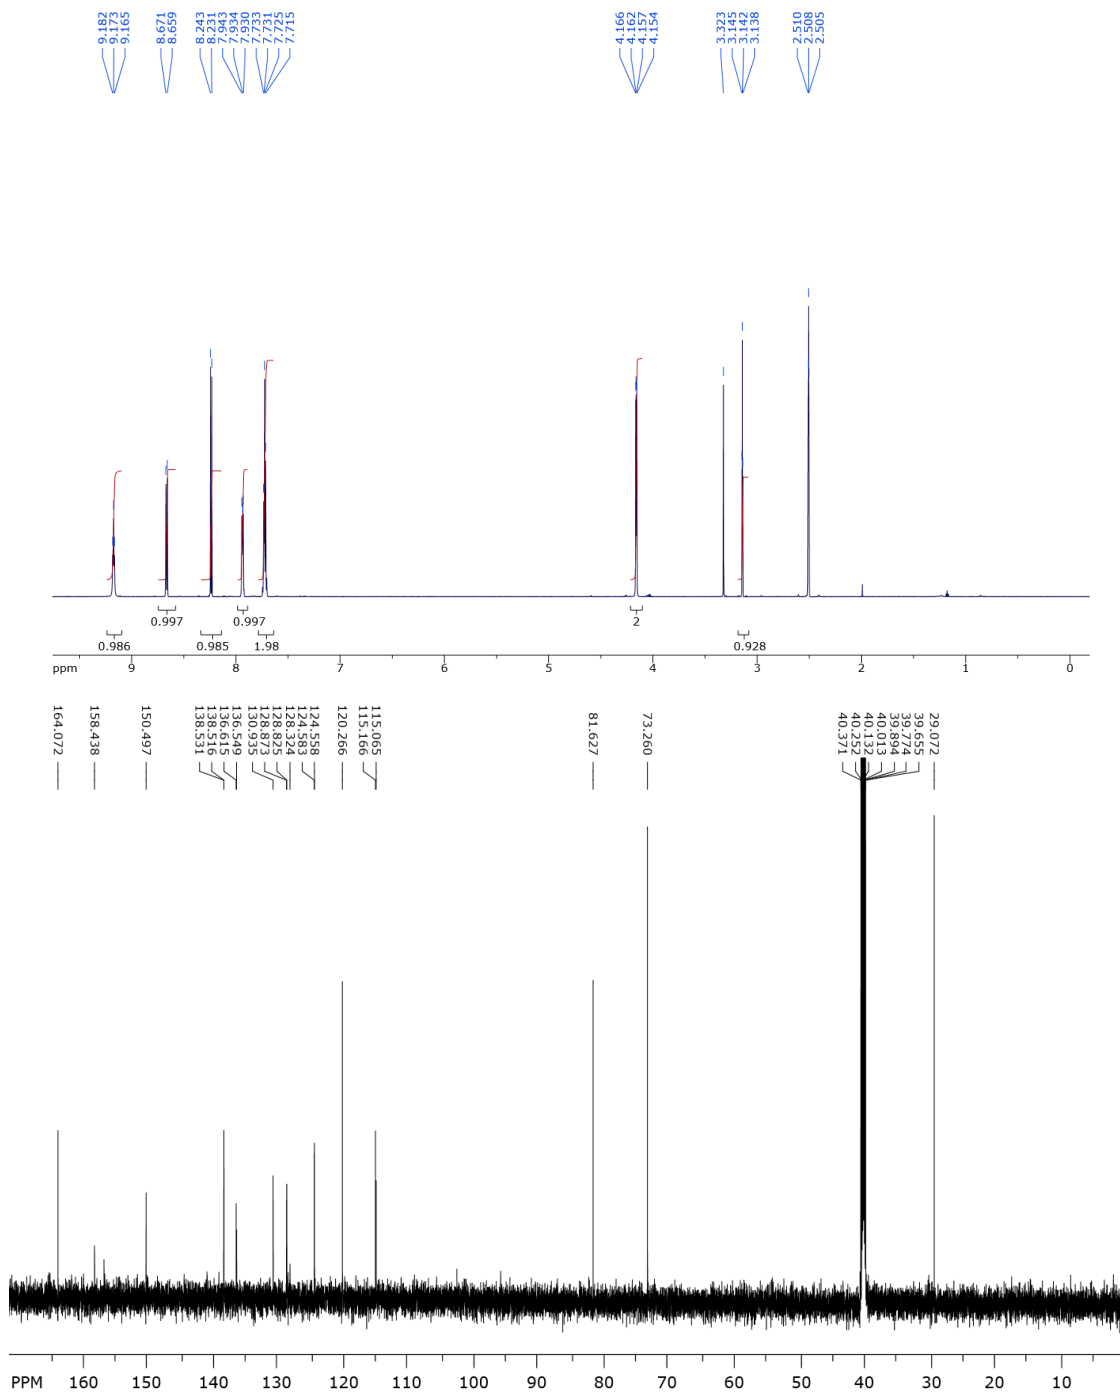

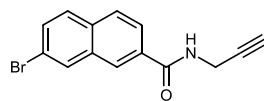

3p

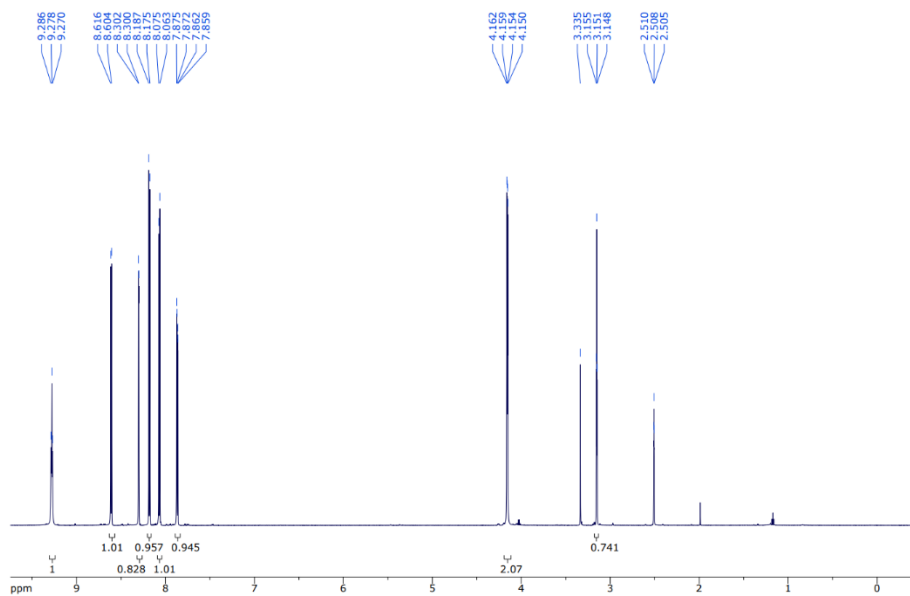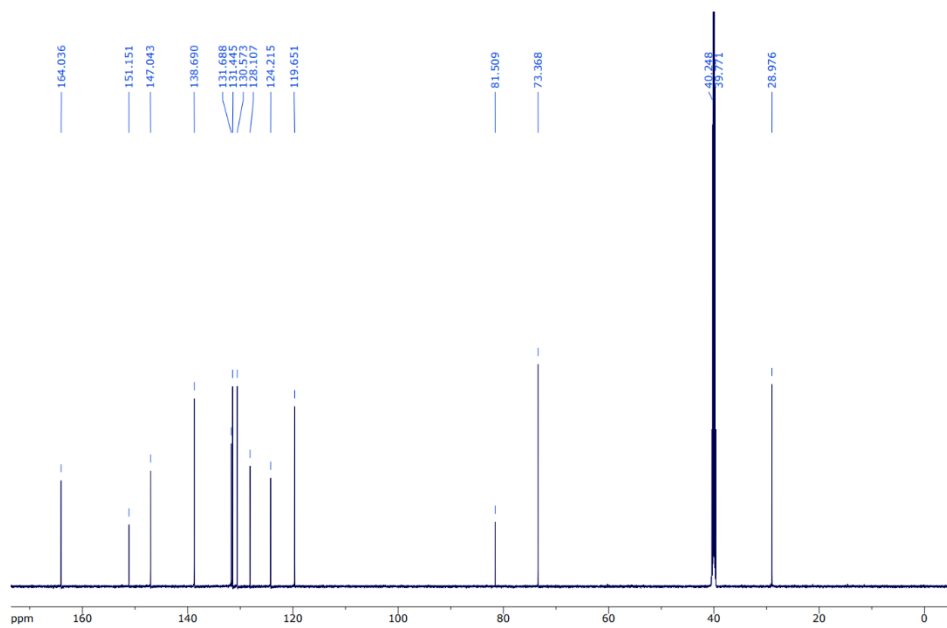

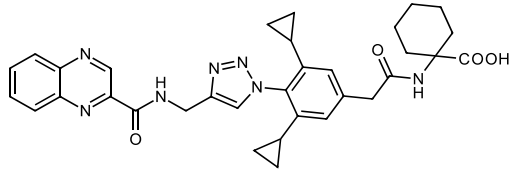

**4a**

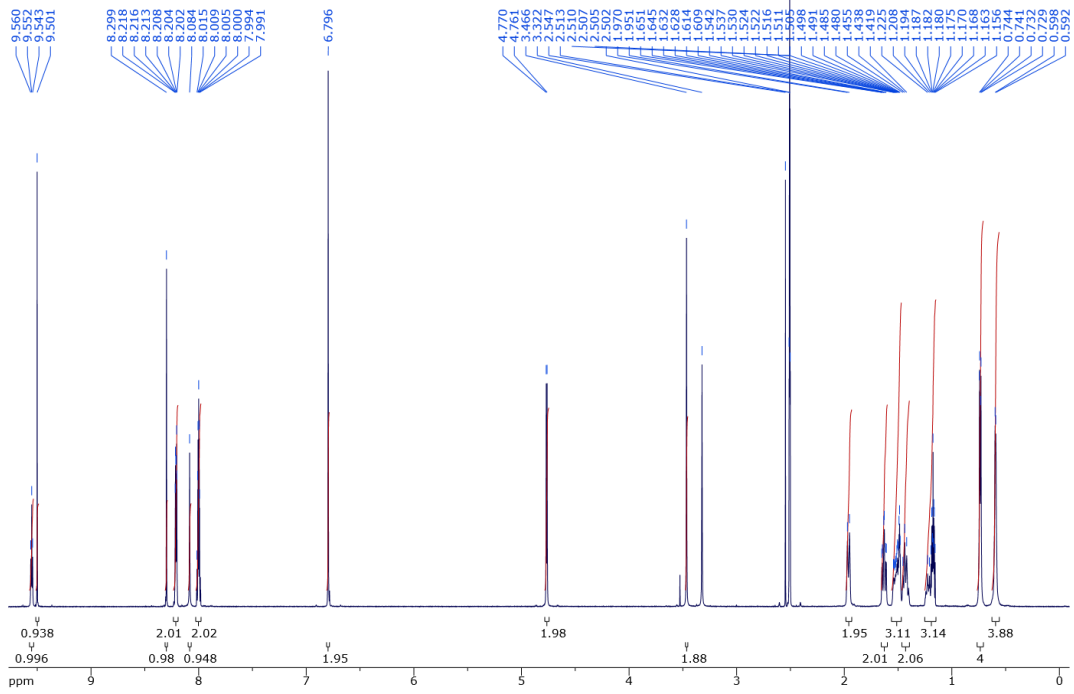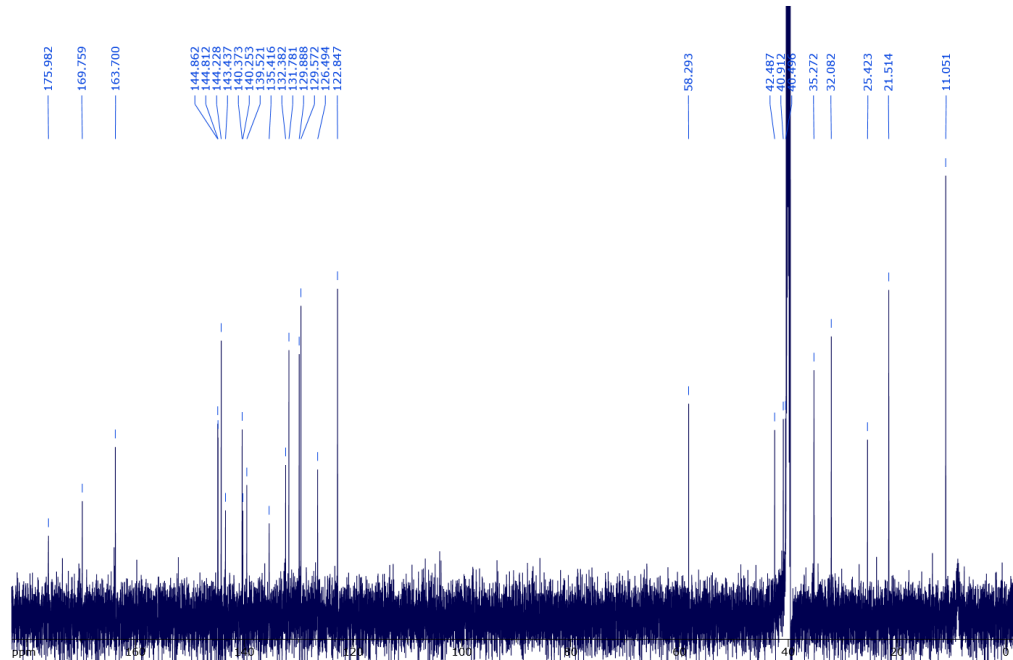



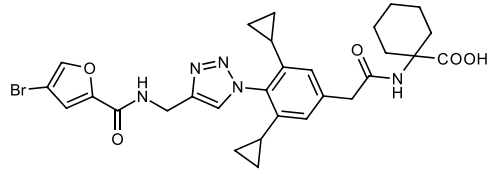

**4b**

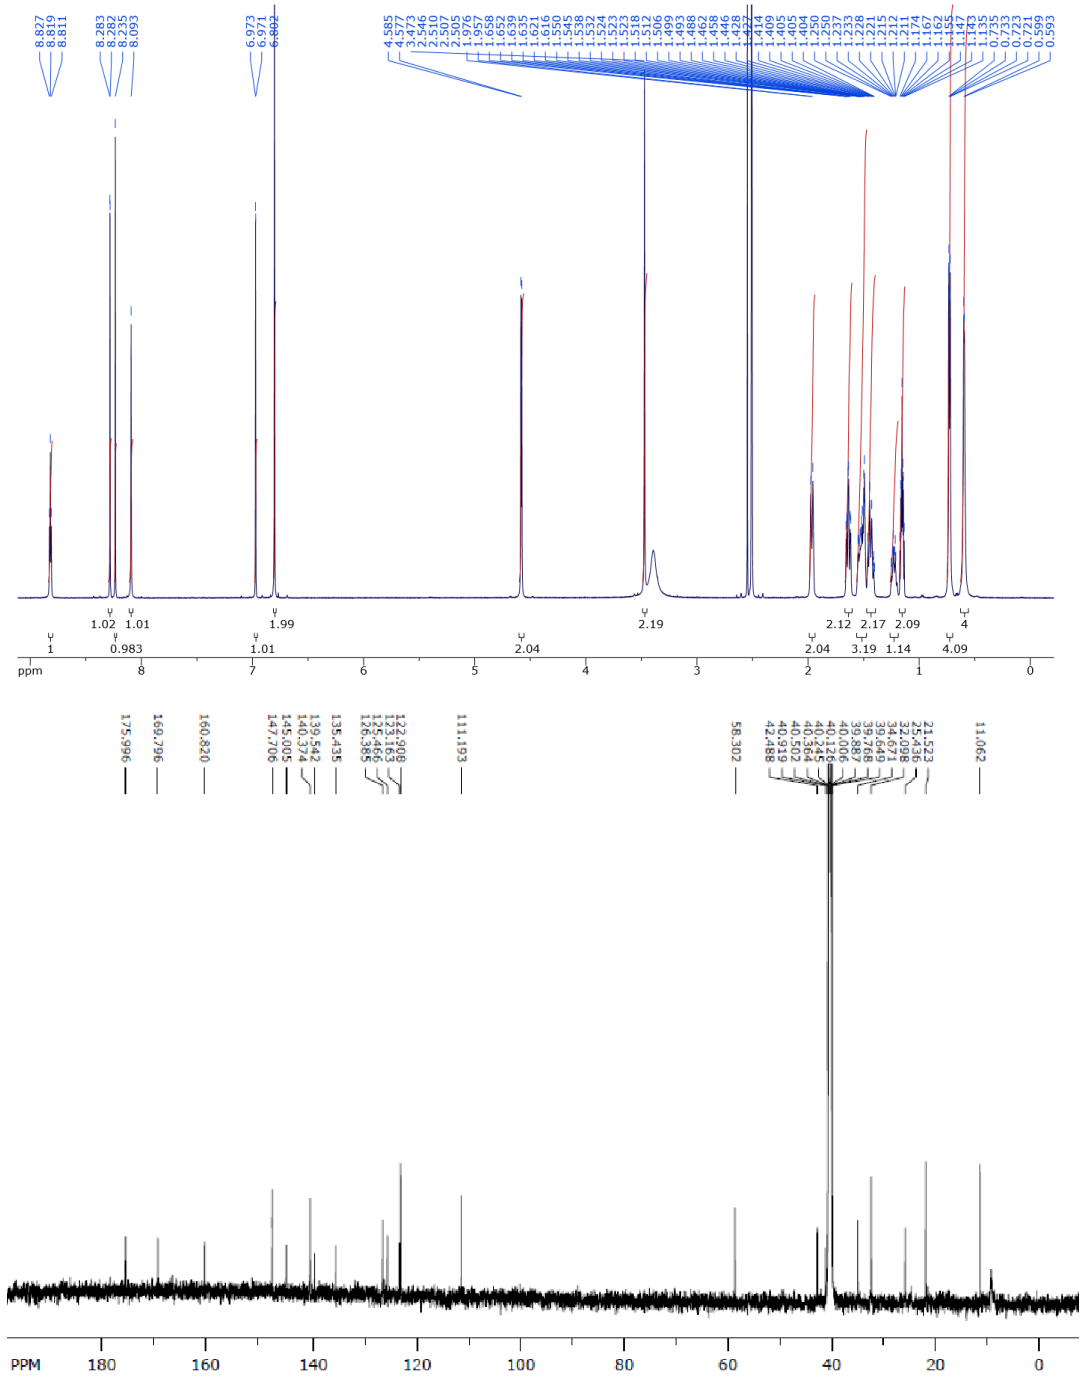

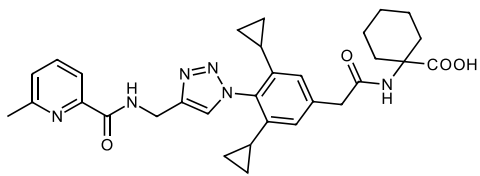

**4c**

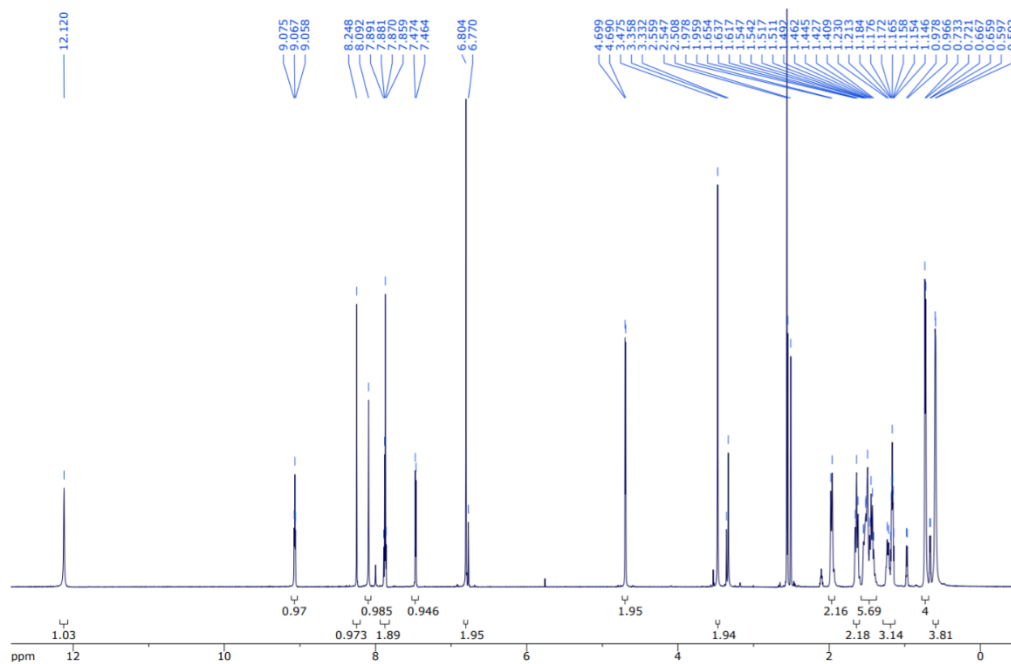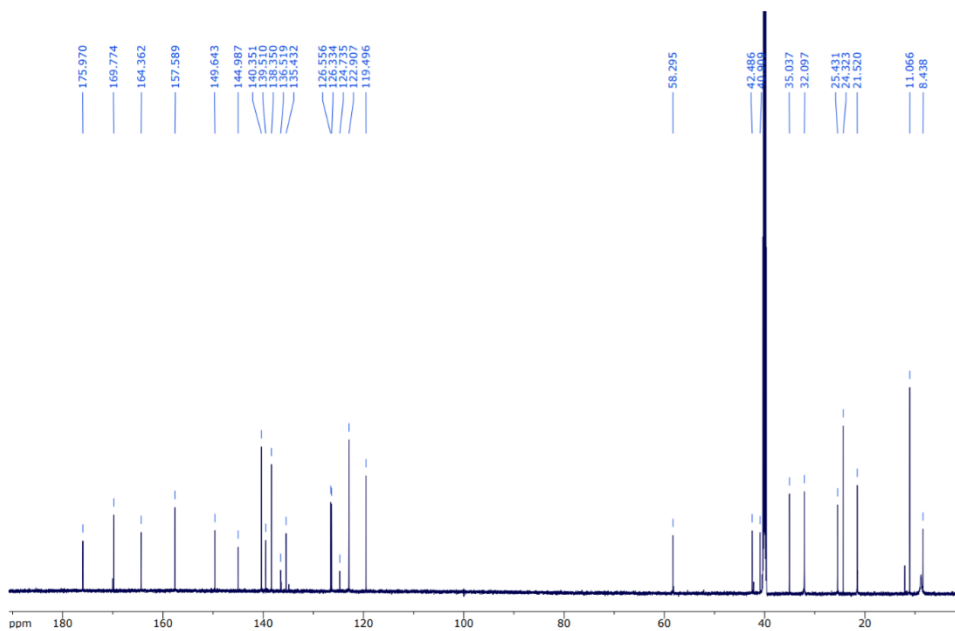

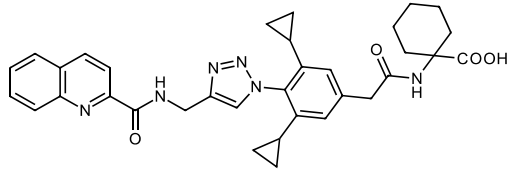

4d

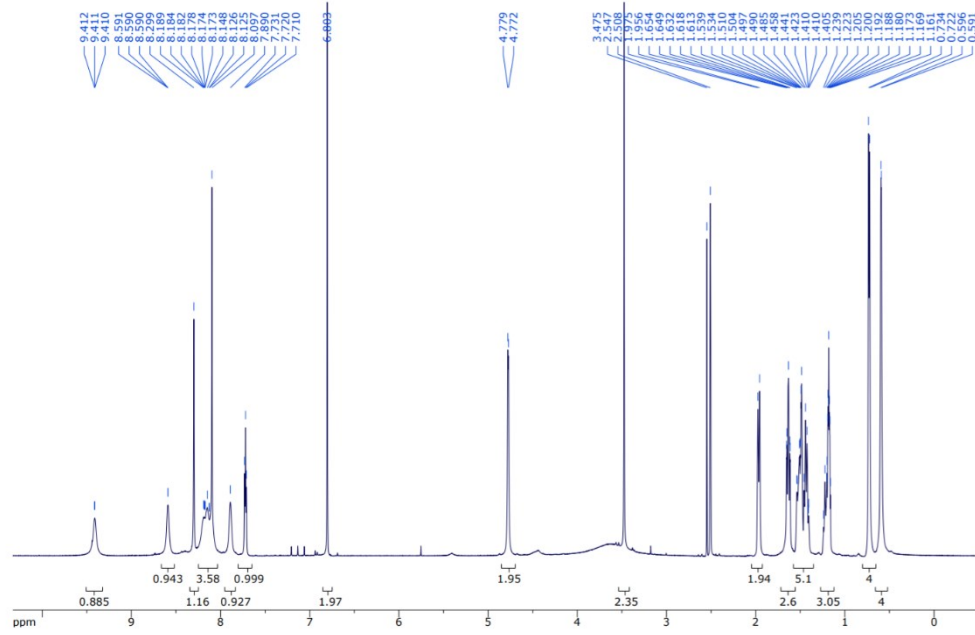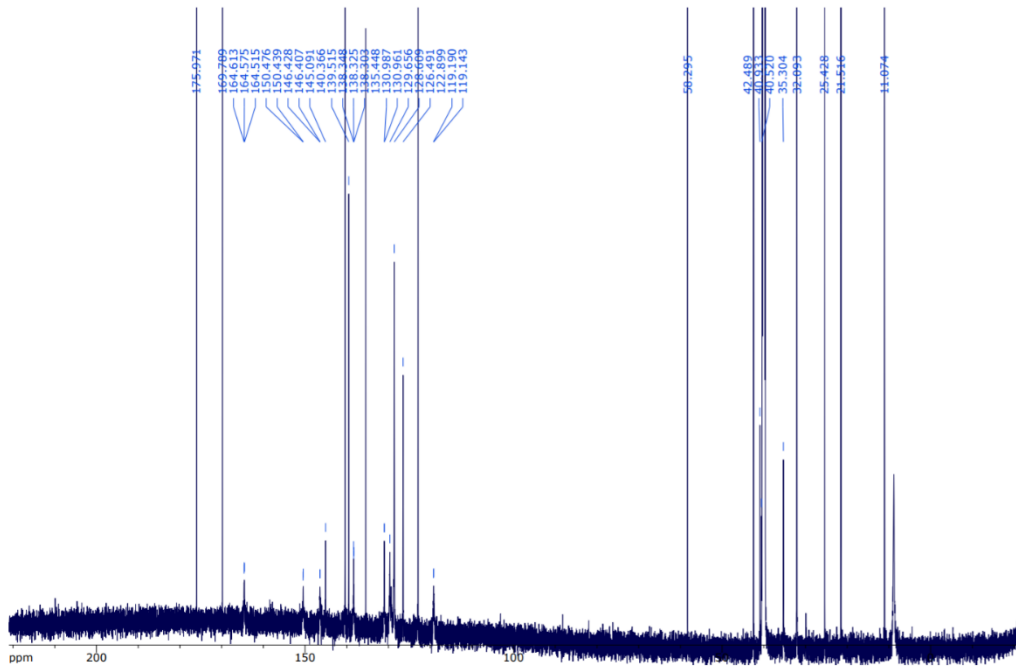

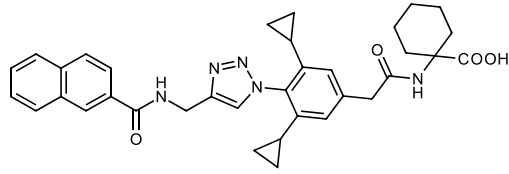

4e

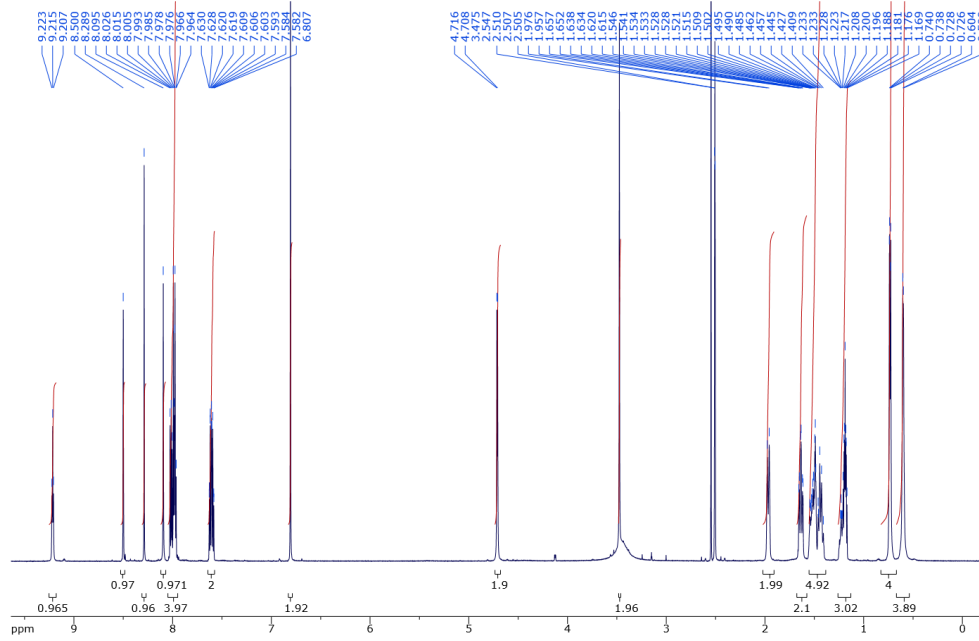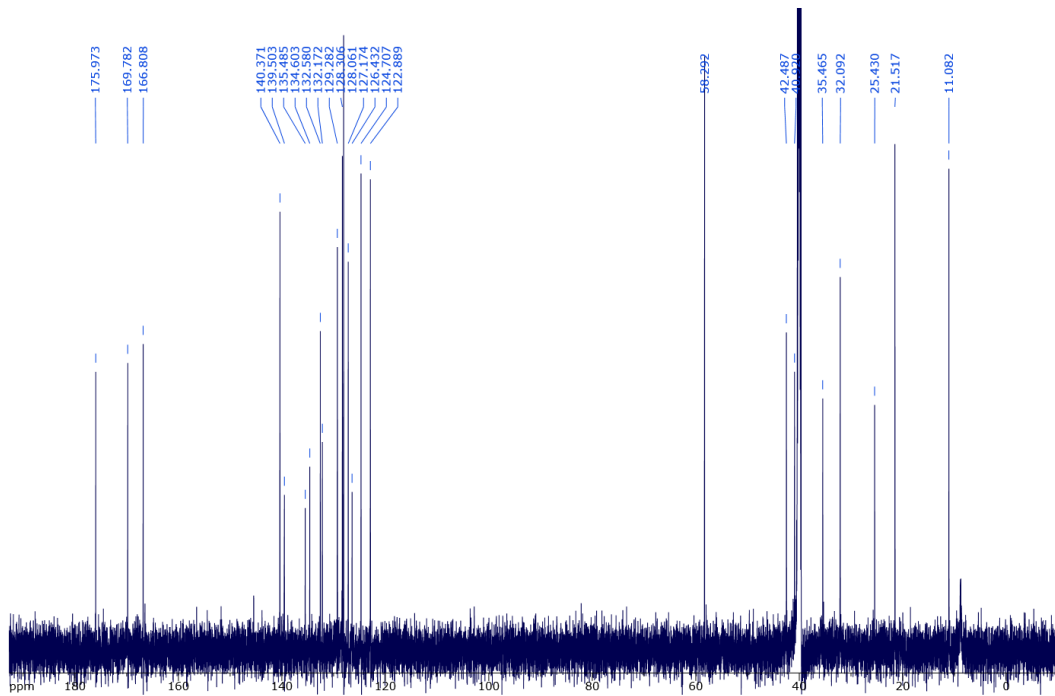

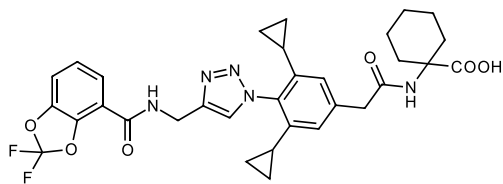

**4f**

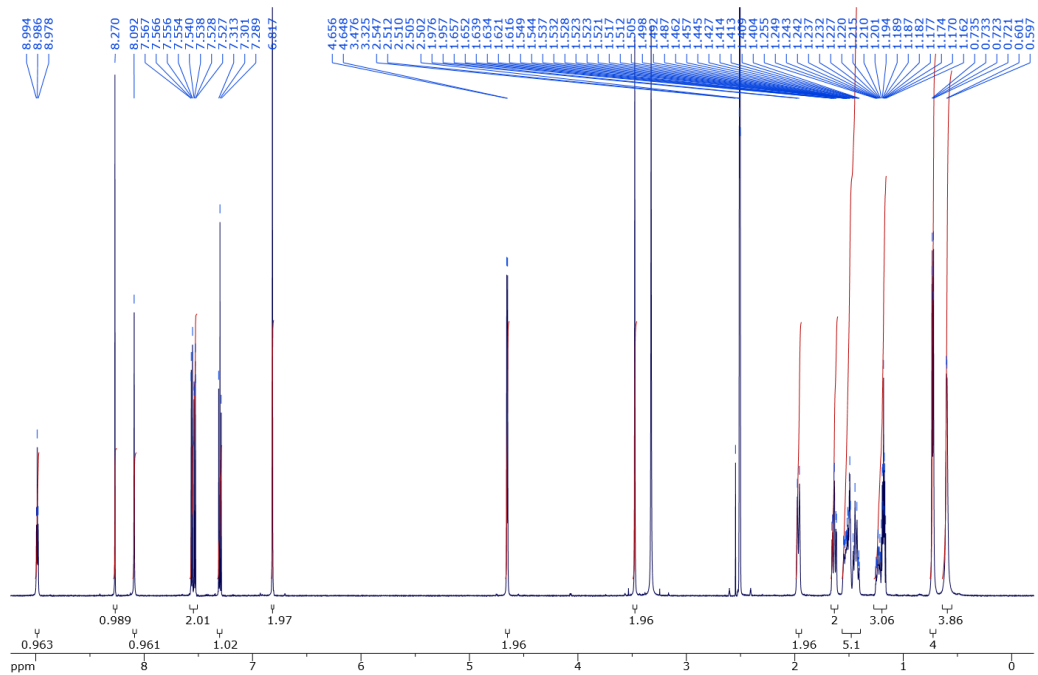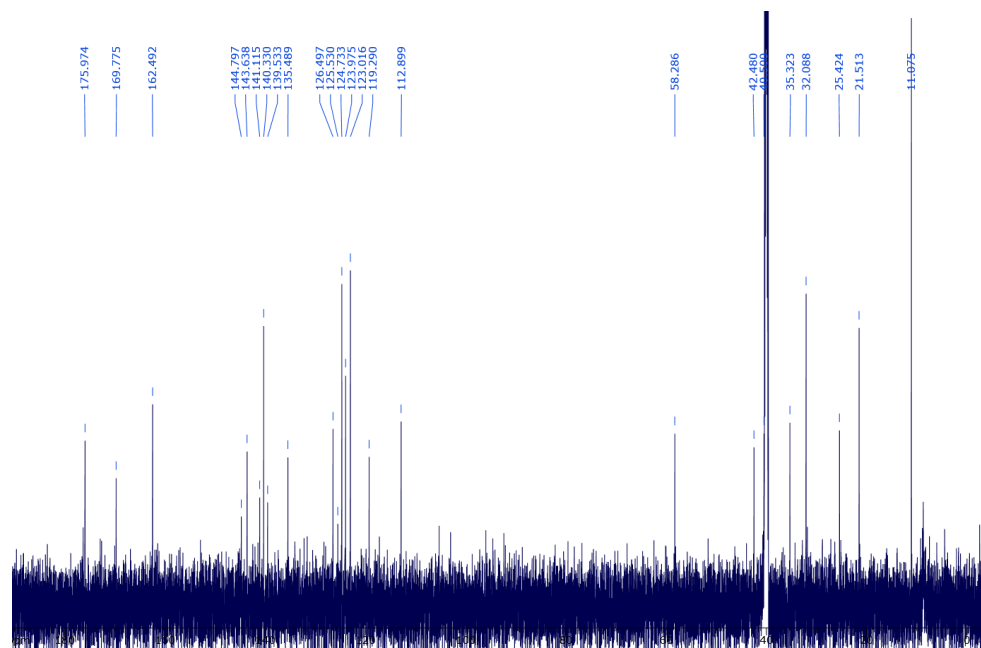

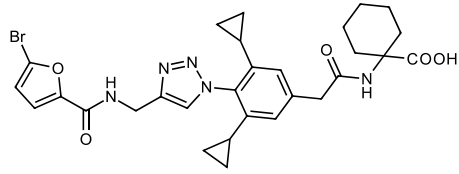

4g

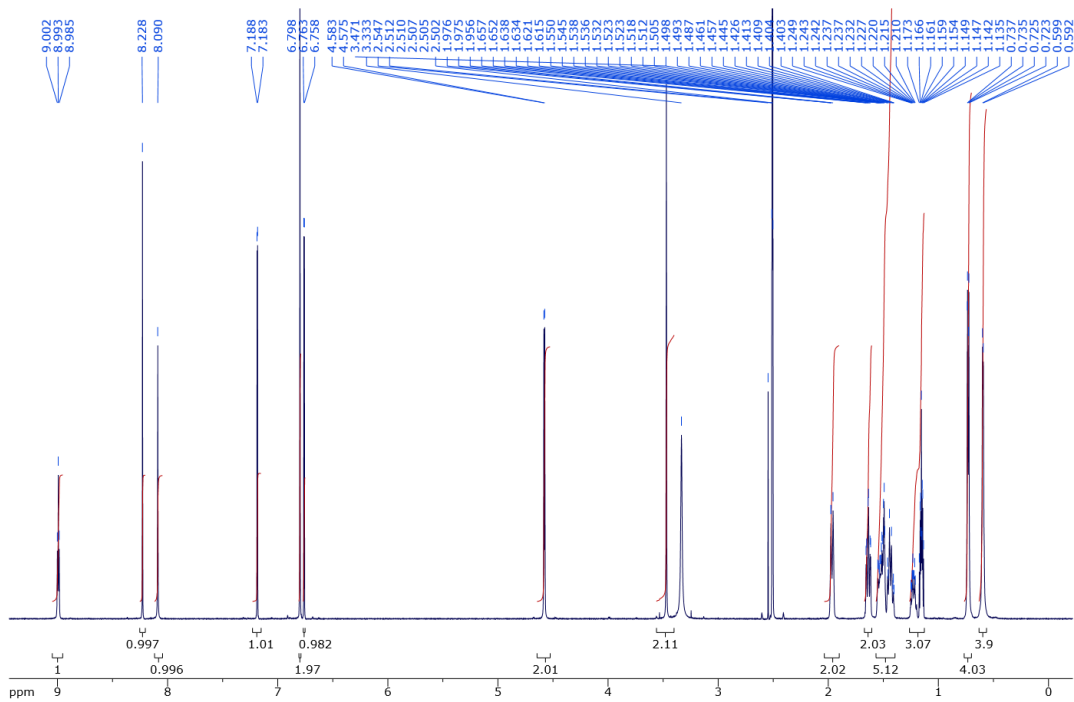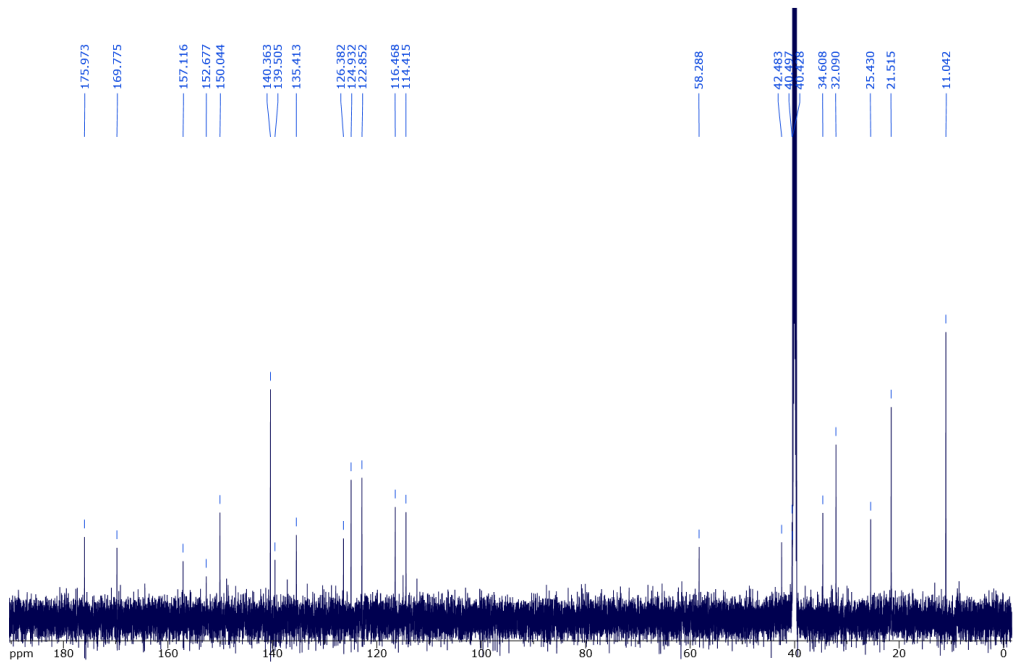

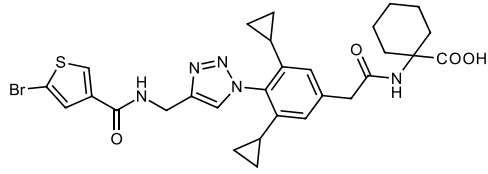

**4h**

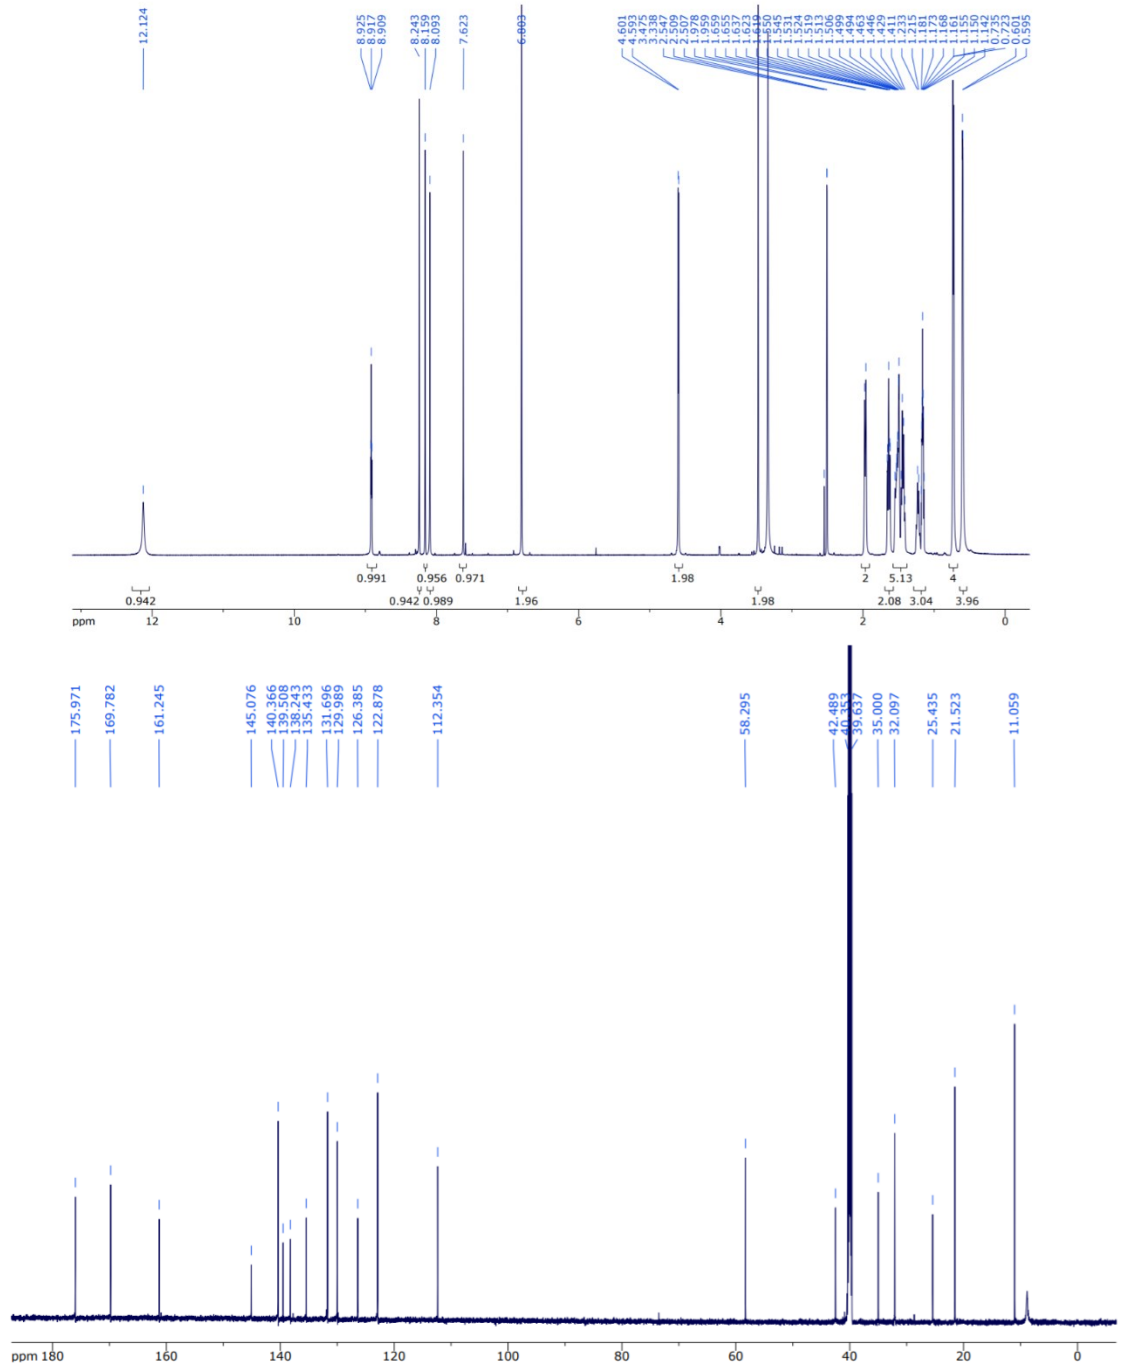

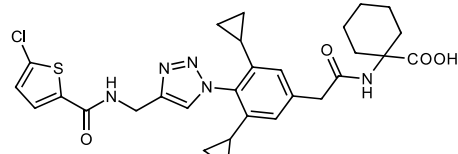

**4i**

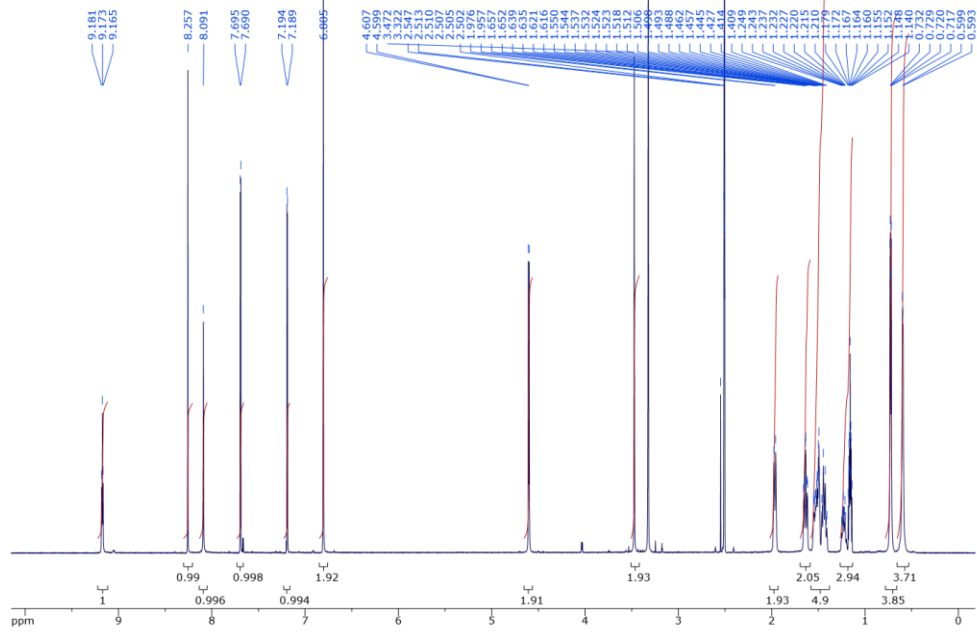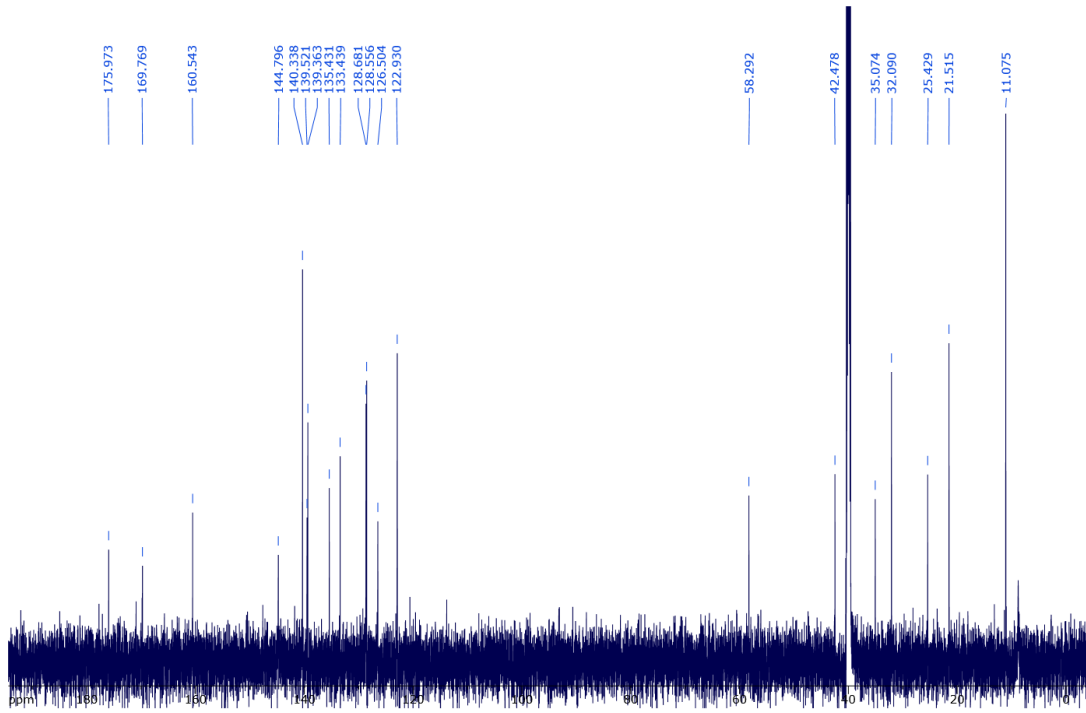



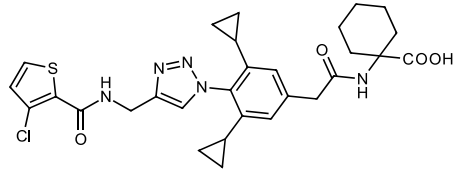

**4j**

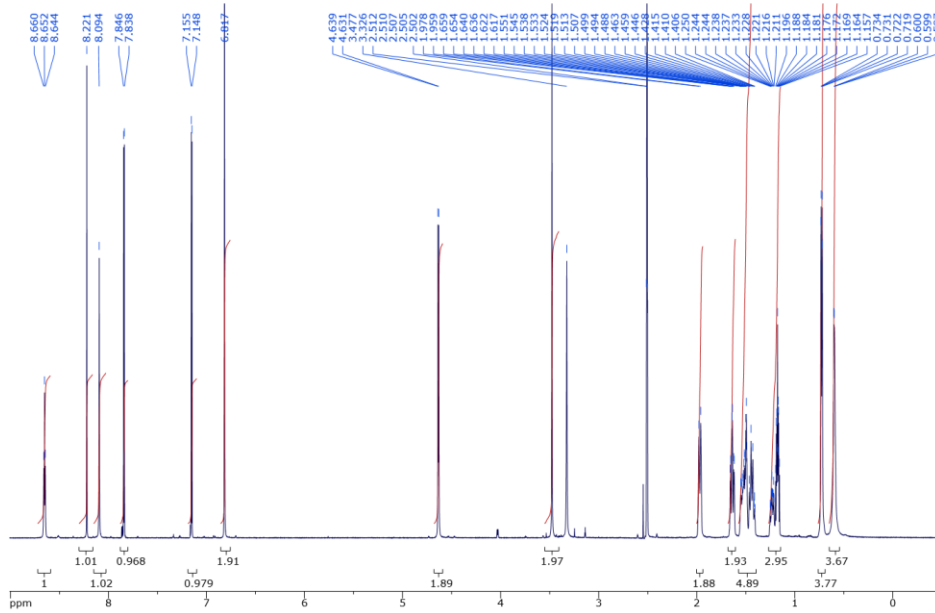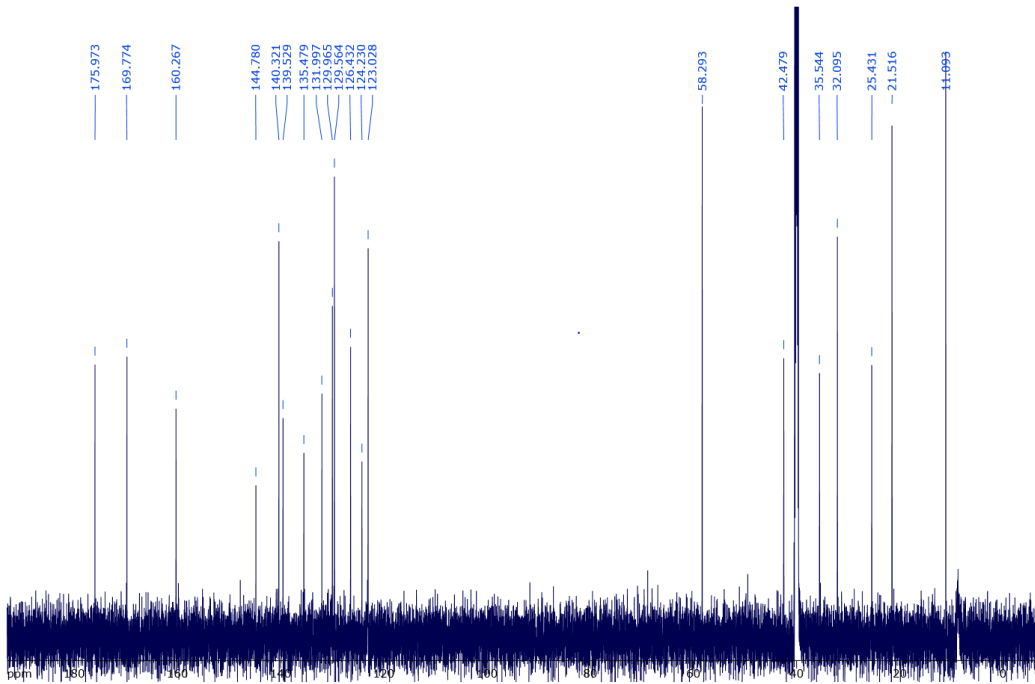

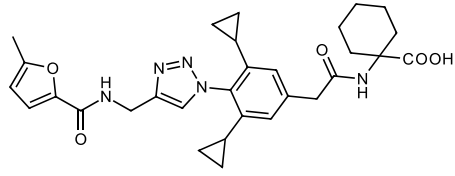

4k

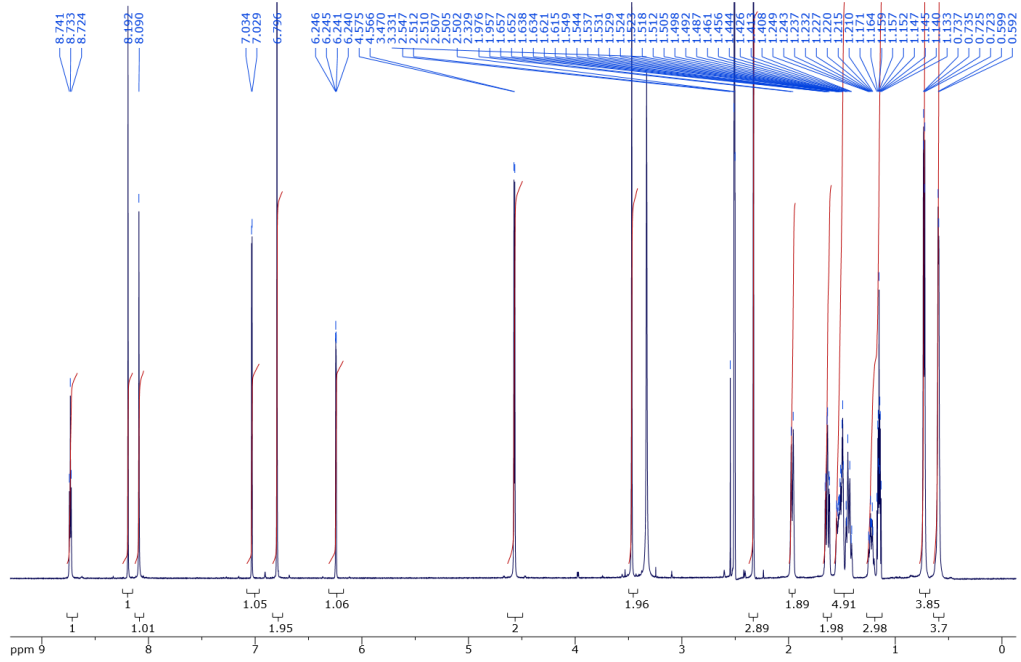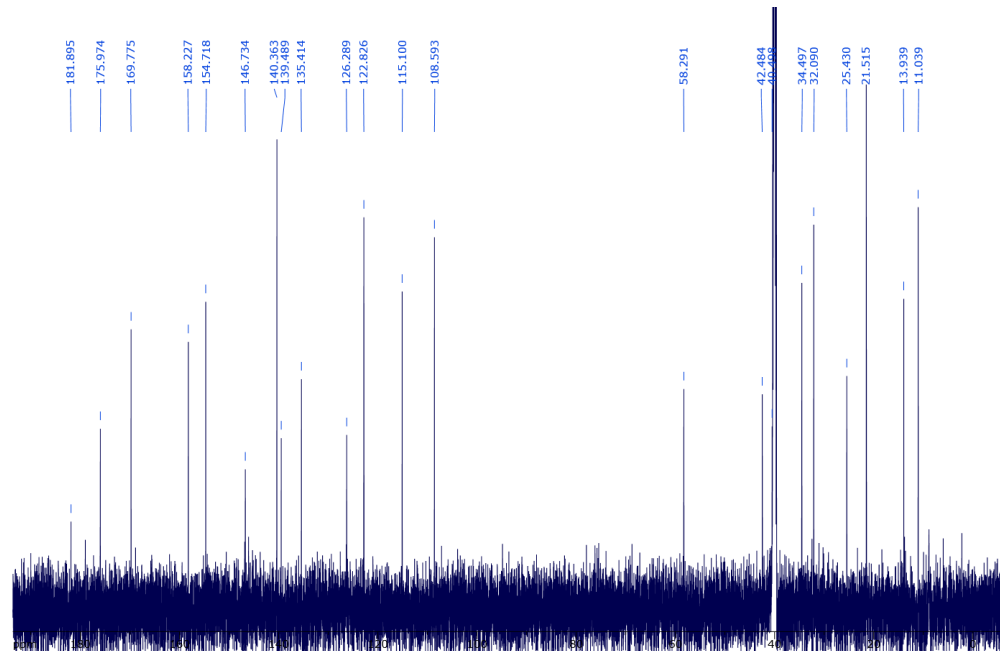

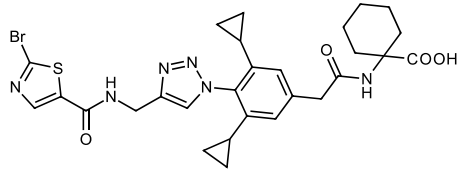

**4I**

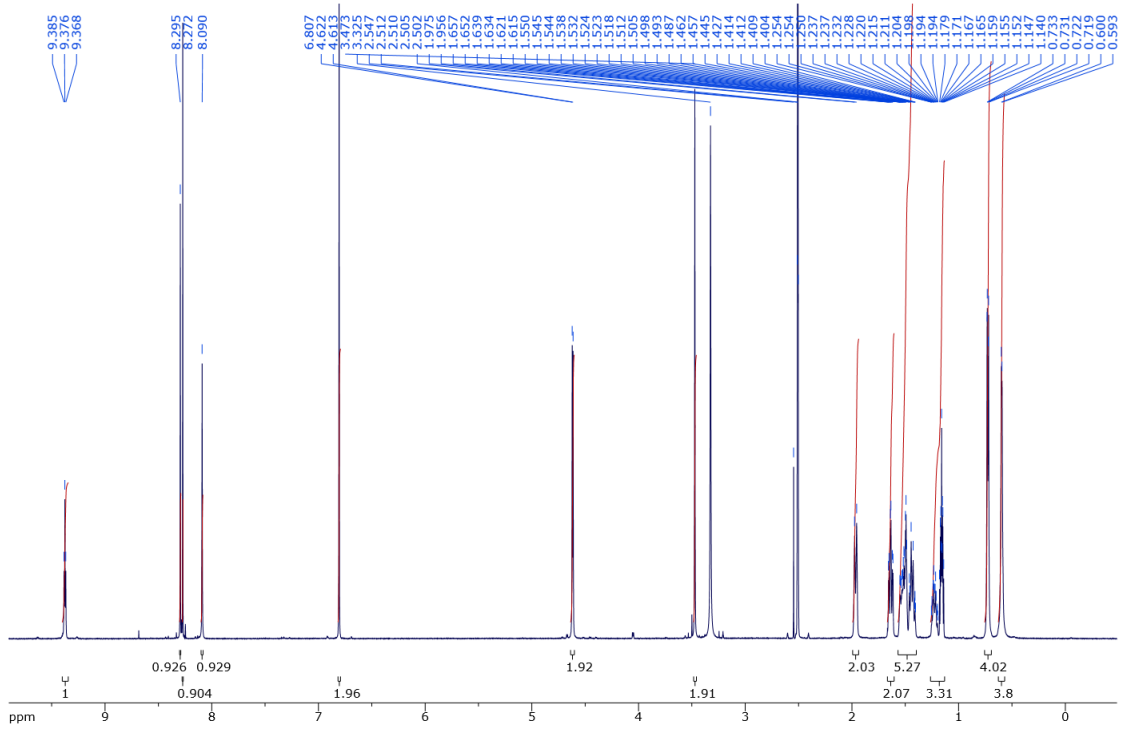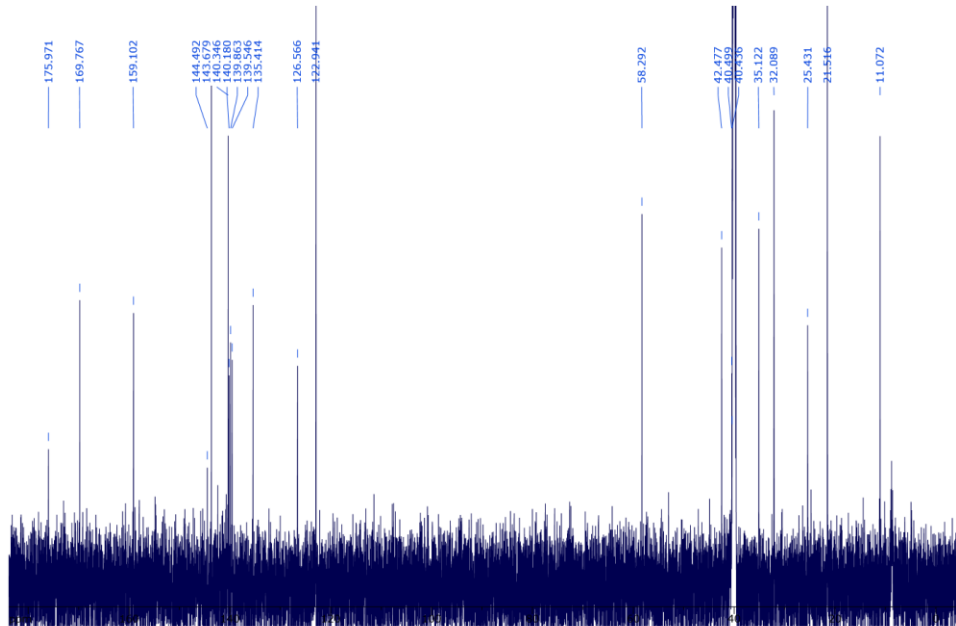

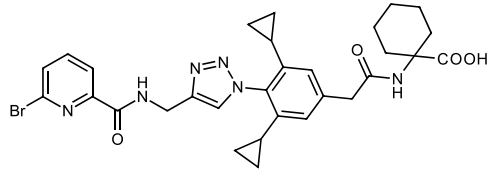

**4m**

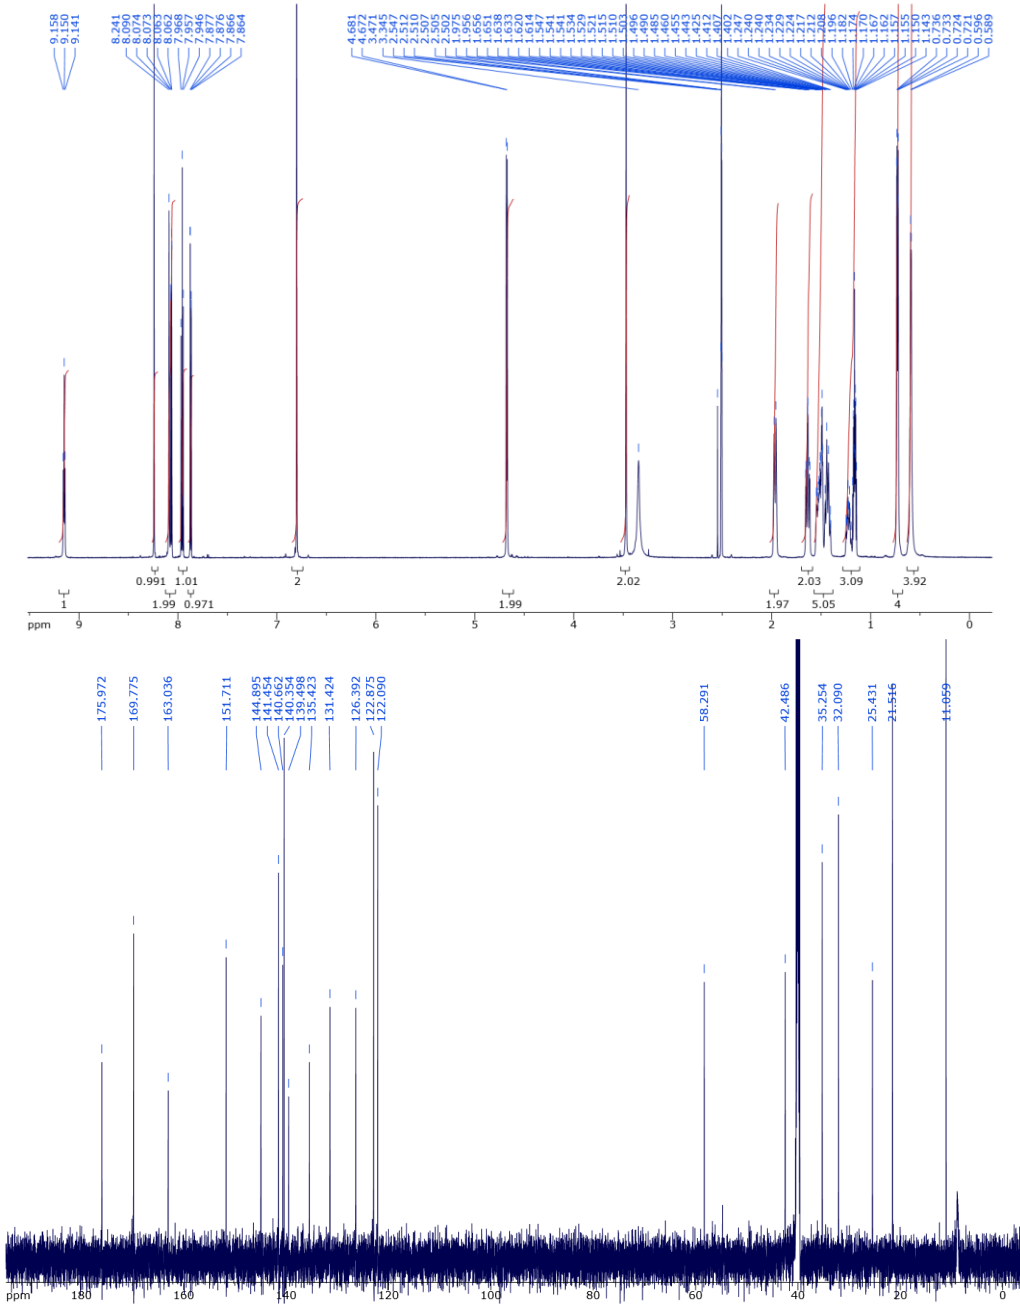

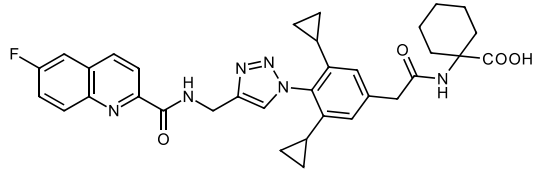

40

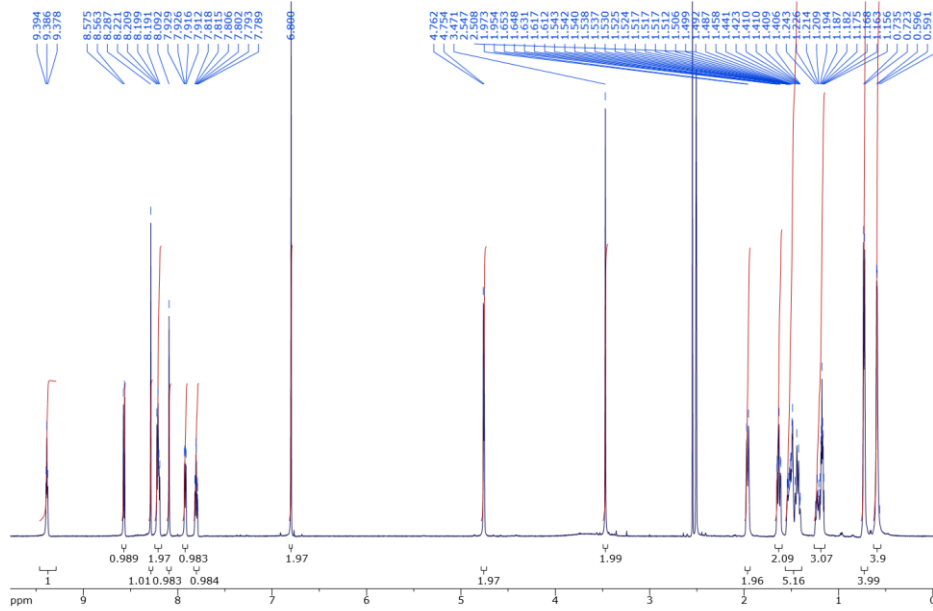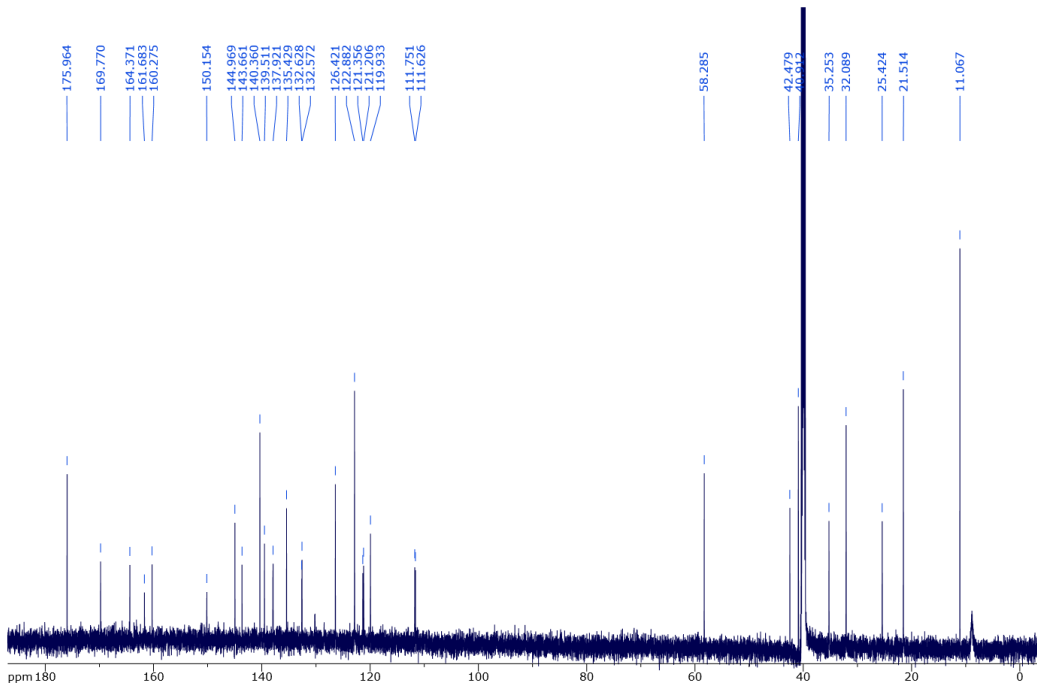

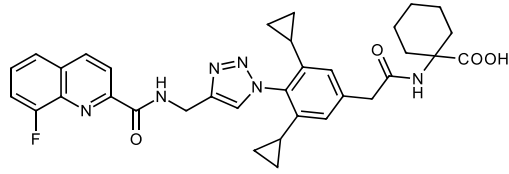

**4n**

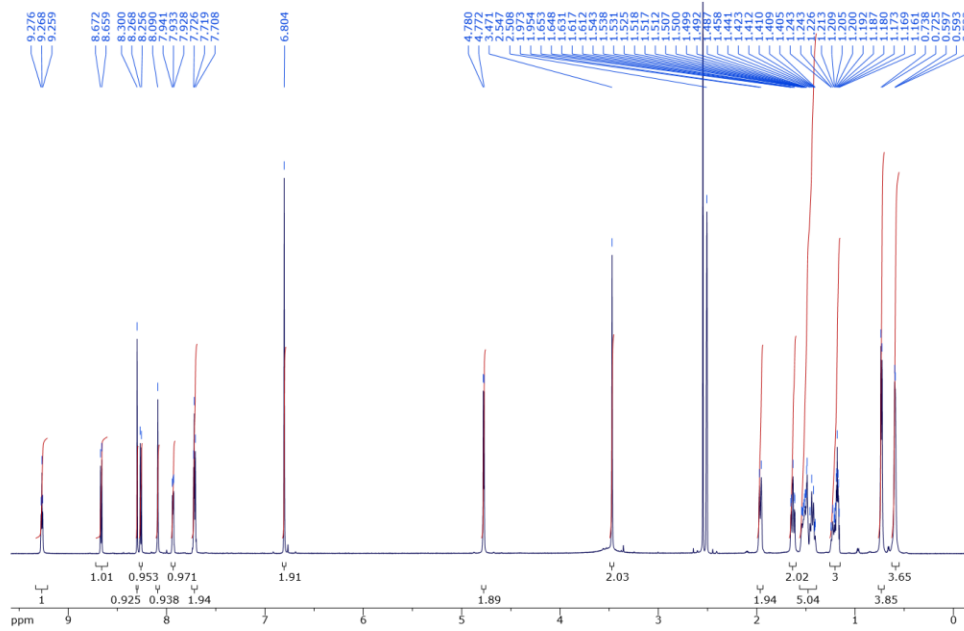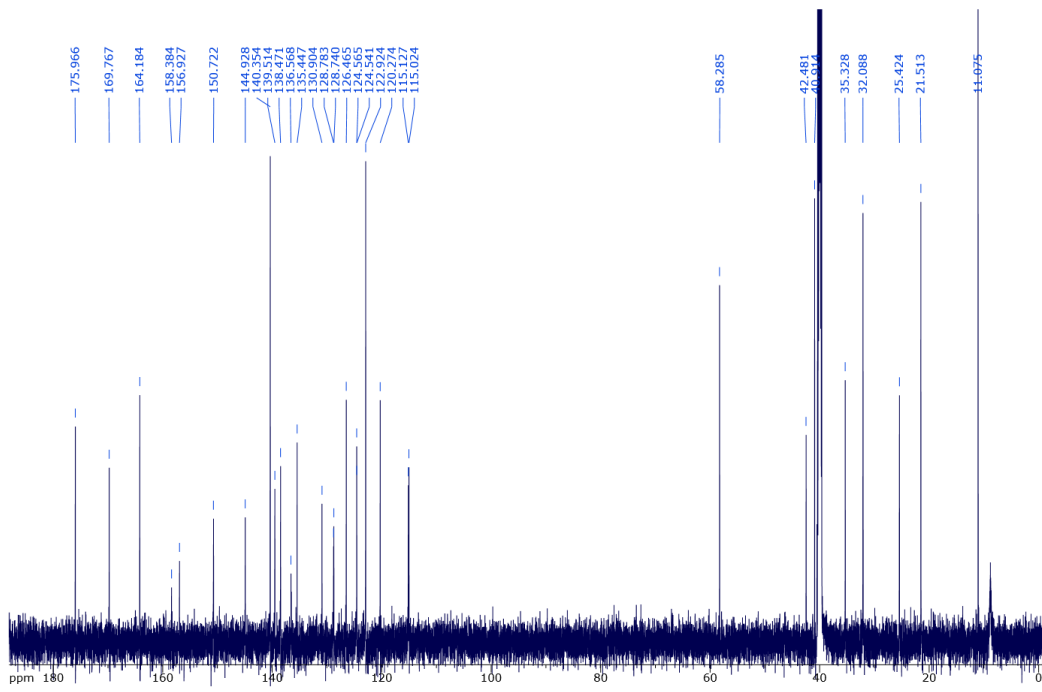

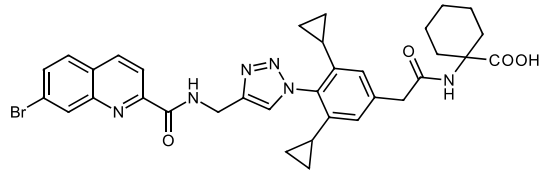

4p

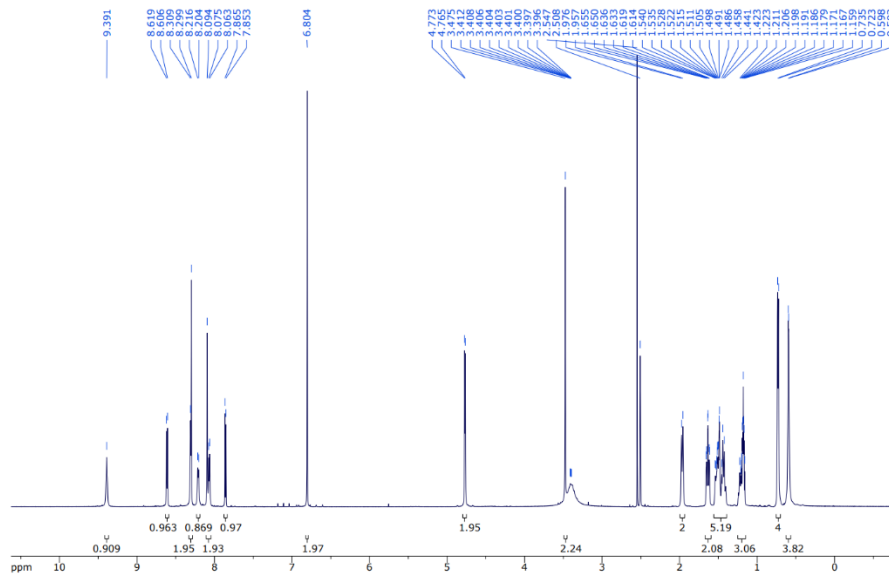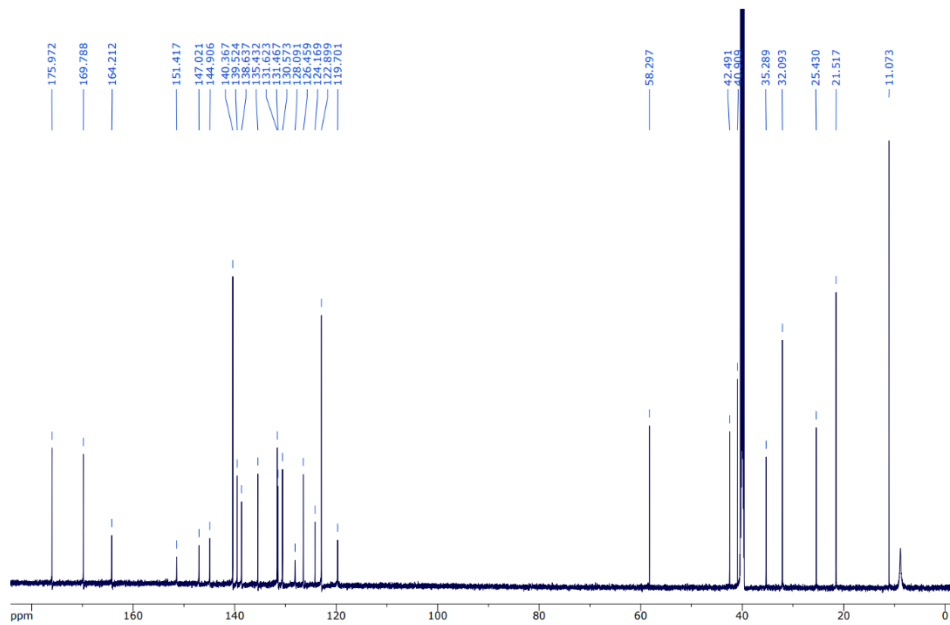





**4r (TAMRA-ANT)**

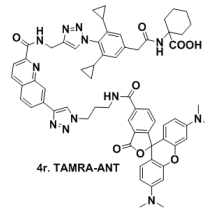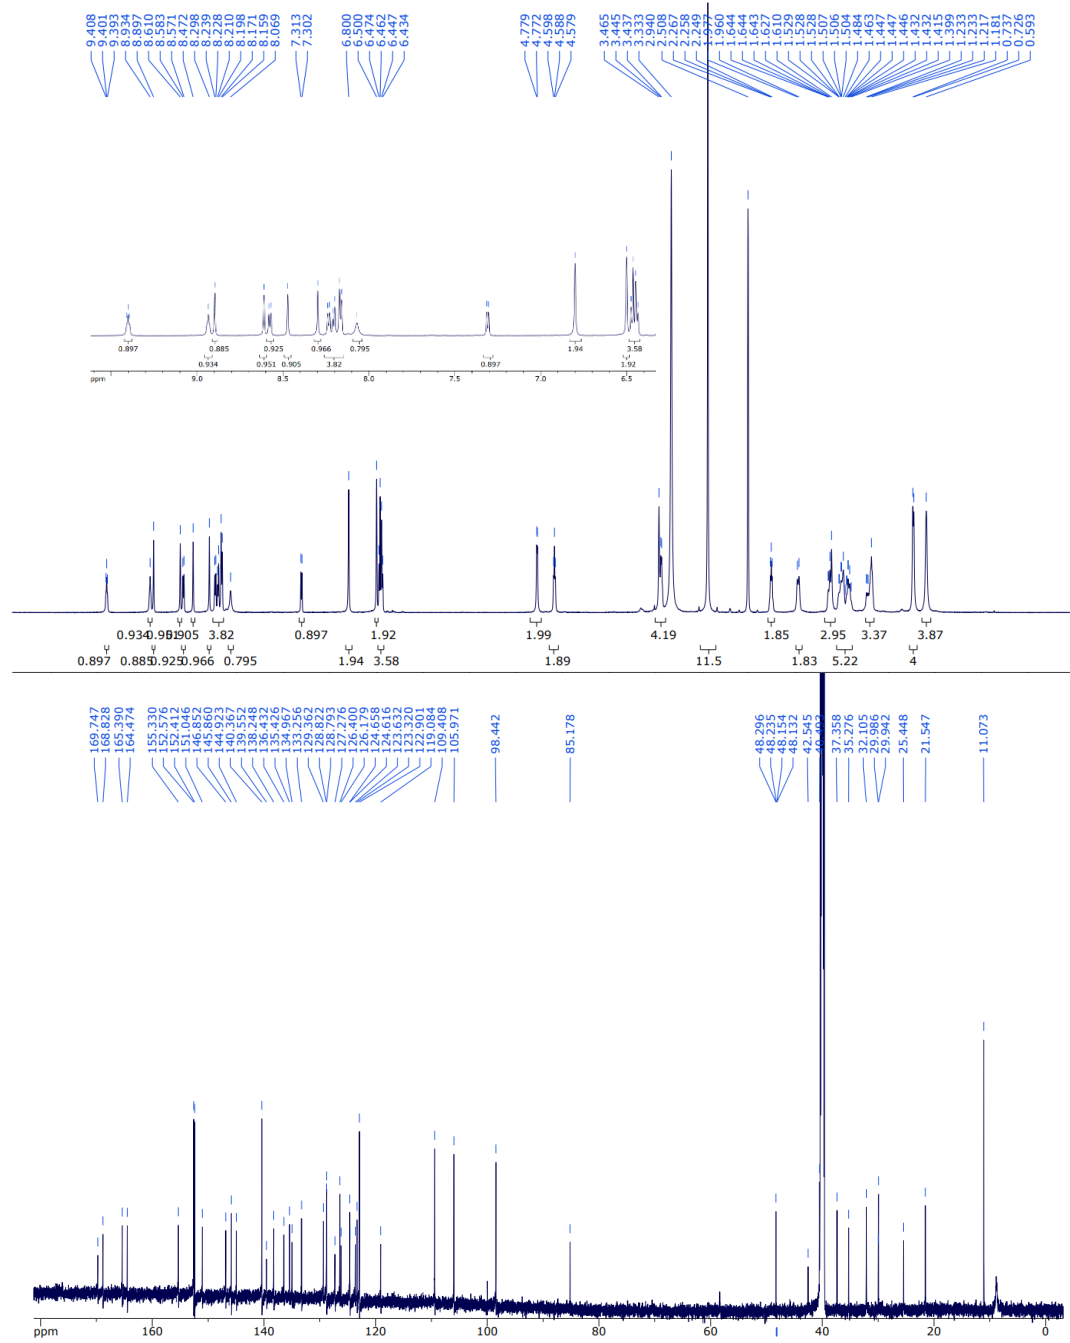

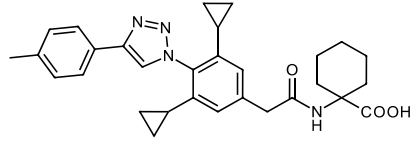

T1

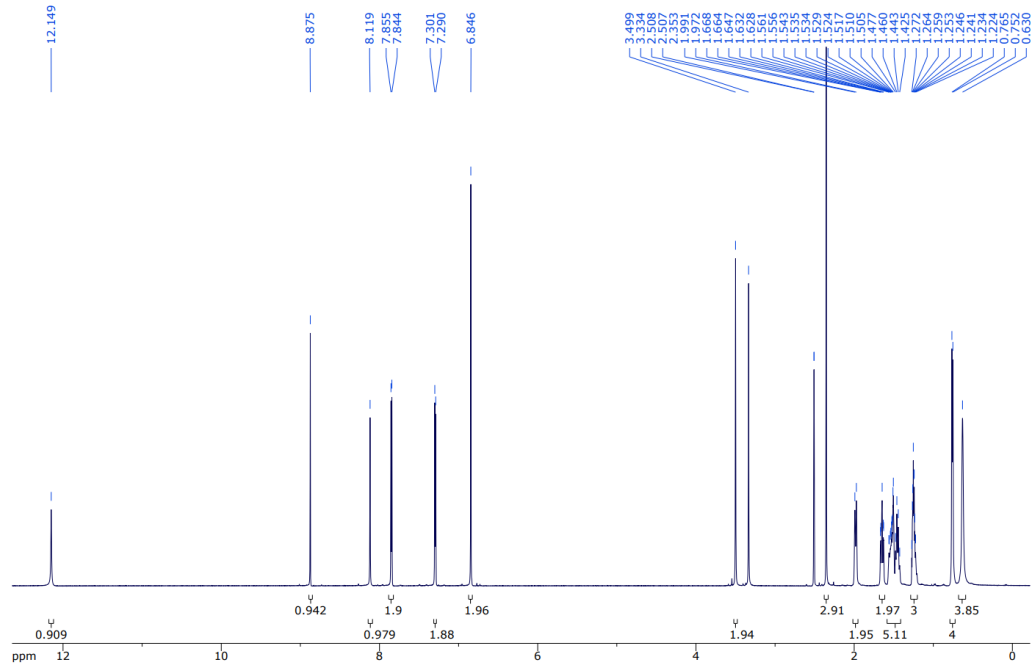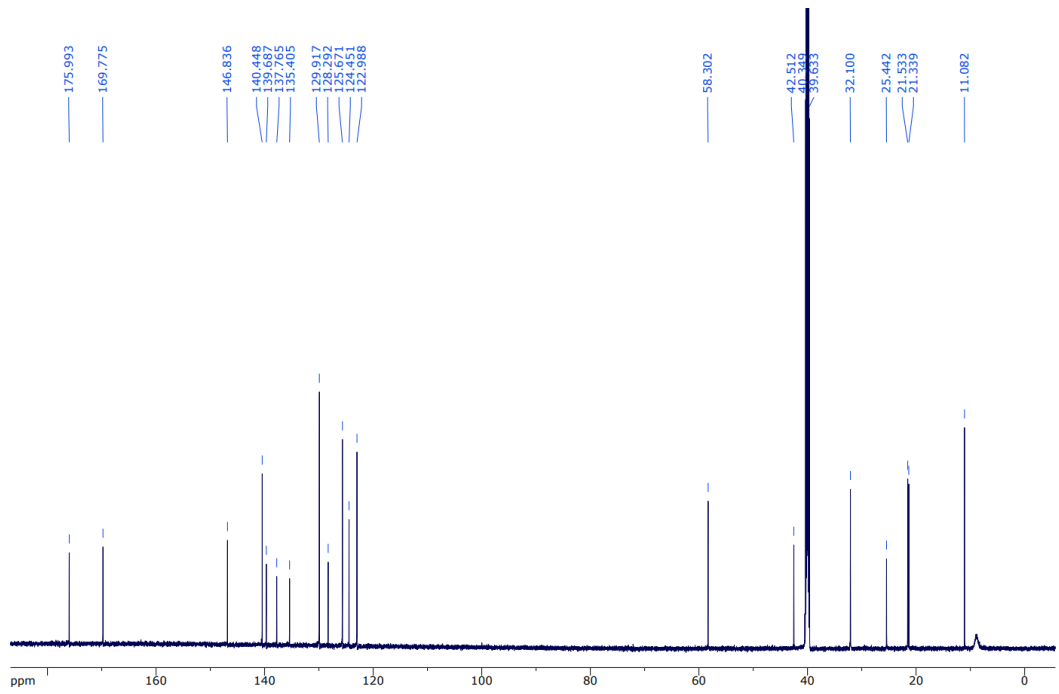

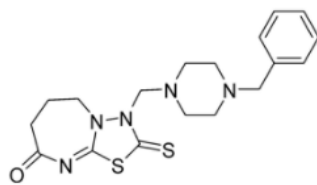

AA1

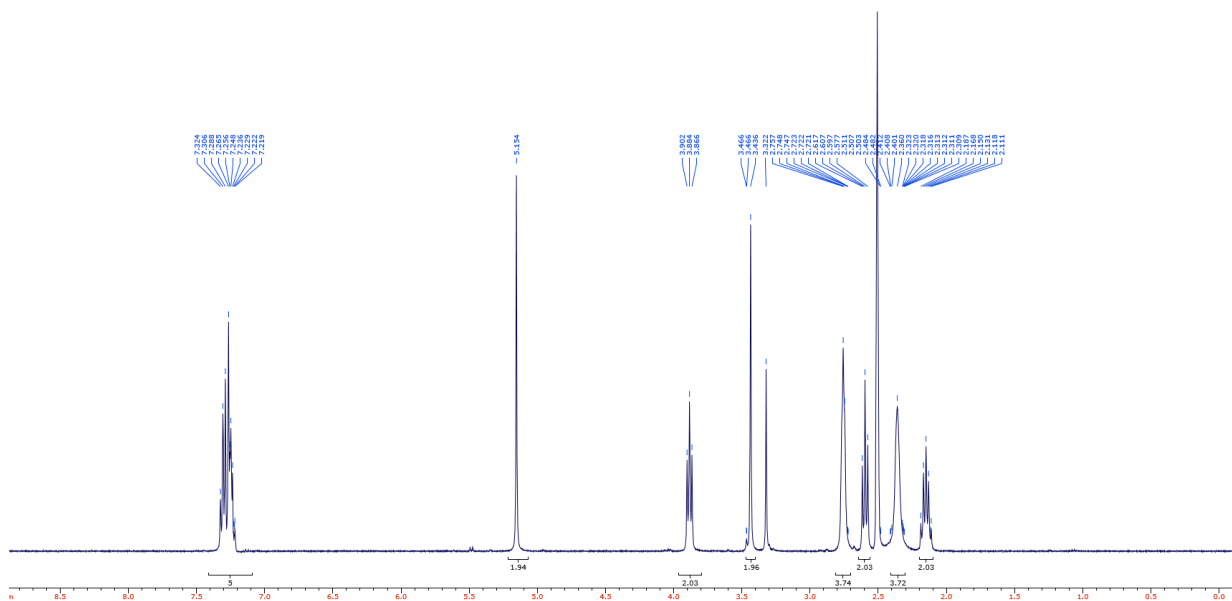

**Dataset S1 (separate file):** Table showing vendor IDs and structures (SMILES notation) of the alkynes which produced click-reaction hits that gave >90% recovery in  $\Delta$ N-HAB1 activity when tested in preliminary PYR1 mediated PP2C inhibition assay with ABA (5000 nM) and triazole hit (50000 nM). Hits were then retested at equimolar concentration with ABA (5000 nM) against representative receptors PYR1, PYL4, and PYL8 belonging to three subfamilies, column values indicating % activity of  $\Delta$ N-HAB1 with individual receptors. Conversion of OPZ was measured by LC/MS analysis of click reactions by comparing the peak area of OPZ in the “click reaction” vs peak area of unreacted OPZ. The %-greening column indicates Arabidopsis seedling growth (measured by quantifying green cotyledon area normalized to seed number 4 days after stratification) treated with chemicals (1000 nM ABA and 10000 nM hit) relative to mock-treated control.

**Dataset S2 (separate file):** Table showing vendor IDs of aryl/heteroaryl carboxylic acids purchased from Combi-Blocks and structure (SMILES notations) of propargyl amides obtained via polymer-supported chemistry. The resultant triazole library (106 members) was tested for antagonistic activity in presence of equimolar concentration with ABA (5000 nM) against representative receptors PYR1, PYL4, PYL8, column values indicating % activity of  $\Delta$ N-HAB1. Table showing structure (SMILE notations) of precursor alkynes (**3a-n**) for triazole hits/ligands **4a-n**, resynthesized, purified (detailed synthesis and analytical data are shown in supplemental section), and retested for antagonistic activity. Hits were tested for antagonist-mediated recovery of PP2C activity in the presence of saturating ABA (5000 nM), PYL/RCAR, and  $\Delta$ N-HAB1 proteins (both at 25 nM).  $EC_{50}$  values were obtained by non-linear fits of dose-response data to the 4 parameters log-logistic equation using the drc R package; assays were conducted in triplicate. Seedling growth was measured by quantifying green cotyledon area normalized to seed number 4 days after stratification;  $EC_{50}$  values indicate the concentration of the antagonist at 50% maximal green pixel area relative to mock control (1000 nM ABA); errors indicate standard deviation of experiments conducted in triplicate.

## References cited

1. A. S. Vaidya, *et al.*, A Rationally Designed Agonist Defines Subfamily IIIA Abscisic Acid Receptors As Critical Targets for Manipulating Transpiration. *ACS Chem. Biol.* **12**, 2842–2848 (2017).
2. A. S. Vaidya, *et al.*, Dynamic control of plant water use using designed ABA receptor agonists. *Science* **366** (2019).
3. M. Okamoto, *et al.*, Activation of dimeric ABA receptors elicits guard cell closure, ABA-regulated gene expression, and drought tolerance. *Proc. Natl. Acad. Sci. U. S. A.* **110**, 12132–12137 (2013).
4. S.-Y. Park, *et al.*, Abscisic acid inhibits type 2C protein phosphatases via the PYR/PYL family of START proteins. *Science* **324**, 1068–1071 (2009).
5. Z. Otwinowski, W. Minor, Processing of X-ray diffraction data collected in oscillation mode. *Methods Enzymol.* **276**, 307–326 (1997).
6. P. D. Adams, *et al.*, PHENIX: a comprehensive Python-based system for macromolecular structure solution. *Acta Crystallogr. D Biol. Crystallogr.* **66**, 213–221 (2010).
7. P. Emsley, K. Cowtan, Coot: model-building tools for molecular graphics. *Acta Crystallogr. D Biol. Crystallogr.* **60**, 2126–2132 (2004).
8. V. B. Chen, *et al.*, MolProbity: all-atom structure validation for macromolecular crystallography. *Acta Crystallogr. D Biol. Crystallogr.* **66**, 12–21 (2010).
9. C. Ritz, F. Baty, J. C. Streibig, D. Gerhard, Dose-Response Analysis Using R. *PLoS One* **10**, e0146021 (2015).
10. S. Salentin, S. Schreiber, V. J. Haupt, M. F. Adasme, M. Schroeder, PLIP: fully automated protein-ligand interaction profiler. *Nucleic Acids Res.* **43**, W443–7 (2015).
11. R. A. Laskowski, M. B. Swindells, LigPlot+: Multiple Ligand–Protein Interaction Diagrams for Drug Discovery. *J. Chem. Inf. Model.* **51**, 2778–2786 (2011).
12. I. Jarmoskaite, I. AISadhan, P. P. Vaidyanathan, D. Herschlag, How to measure and evaluate binding affinities. *Elife* **9** (2020).
13. J. Takeuchi, *et al.*, Designed abscisic acid analogs as antagonists of PYL-PP2C receptor interactions. *Nat. Chem. Biol.* **10**, 477–482 (2014).
14. R. Mega, *et al.*, Tuning water-use efficiency and drought tolerance in wheat using abscisic acid receptors. *Nat Plants* **5**, 153–159 (2019).
15. O. Pri-Tal, L. Shaar-Moshe, G. Wiseglass, Z. Peleg, A. Mosquna, Non-redundant functions of the dimeric ABA receptor Bd PYL 1 in the grass *Brachypodium*. *Plant J.* **92**, 774–786 (2017).
16. M.-J. Cao, *et al.*, ABA-mimicking ligand AMF4 in complex with ABA receptor PYL2 and PP2C HAB1 (2017) <https://doi.org/10.2210/pdb5vsr/pdb>.
17. J. Takeuchi, *et al.*, Structure-Based Chemical Design of Abscisic Acid Antagonists That Block PYL–PP2C Receptor Interactions. *ACS Chem. Biol.* **13**, 1313–1321 (2018).
